# Supplementary material for: Safety of Hormonal Replacement Therapy and Oral Contraceptives in Systemic Lupus Erythematosus: A Systematic Review and Meta-Analysis
Source: PubMed Central journal article supplement (PMC4138076; doi:10.1371/journal.pone.0104303), 2014-08-19
Supplement: pone.0104303.s003.pdf [file pone.0104303.s003.pdf]

|                                   |   |   |   |   |   |   |   |
|-----------------------------------|---|---|---|---|---|---|---|
| Sanchez Guerrero et al. 2007 [48] | + | + | + | ? | + | + | + |
| Petri et al. 2005 [44]            | + | + | + | + | + | + | + |
| Buyón et al. 2005 [50]            | + | + | + | + | + | + | + |
| Sanchez Guerrero et al. 2005 [57] | + | - | ? | - | + | + | ? |

Random sequence generation  
Allocation concealment  
Blinding of participants and personnel  
Blinding of outcome assessment  
Incomplete outcome data  
Selective reporting  
Other bias

Low Risk of Bias  
 High Risk of Bias  
 Unclear Risk of Bias
