# Supplementary material for: Safety of Hormonal Replacement Therapy and Oral Contraceptives in Systemic Lupus Erythematosus: A Systematic Review and Meta-Analysis
Source: PubMed Central journal article supplement (PMC4138076; doi:10.1371/journal.pone.0104303), 2014-08-19
Supplement: pone.0104303.s004.pdf [file pone.0104303.s004.pdf]

| Order                |                      |
|----------------------|----------------------|
| Analysis description | Title                |
| Forest Plot          | Random Model         |
| Calculations         | Heterogeneity Table  |
| One Study Removed    | Sensibility Analysis |
| Cumulative Analysis  | Cumulative Analysis  |
| Funnel Plot          | Funnel Plot of SE    |
| Calculations         | Classic              |
|                      | Begg                 |
|                      | Egger                |
|                      | Duval                |

|                       |                                                                                      |
|-----------------------|--------------------------------------------------------------------------------------|
| <b>Articles</b>       | <b>Cohort and C&amp;C<br/>HRT exposed</b>                                            |
| <b>Outcomes</b>       | <b>SLE</b>                                                                           |
| <b>Limits</b>         | <ul style="list-style-type: none"><li>• “current use”</li><li>• “past use”</li></ul> |
| <b>Effect measure</b> | <b>Rate Ratio</b>                                                                    |

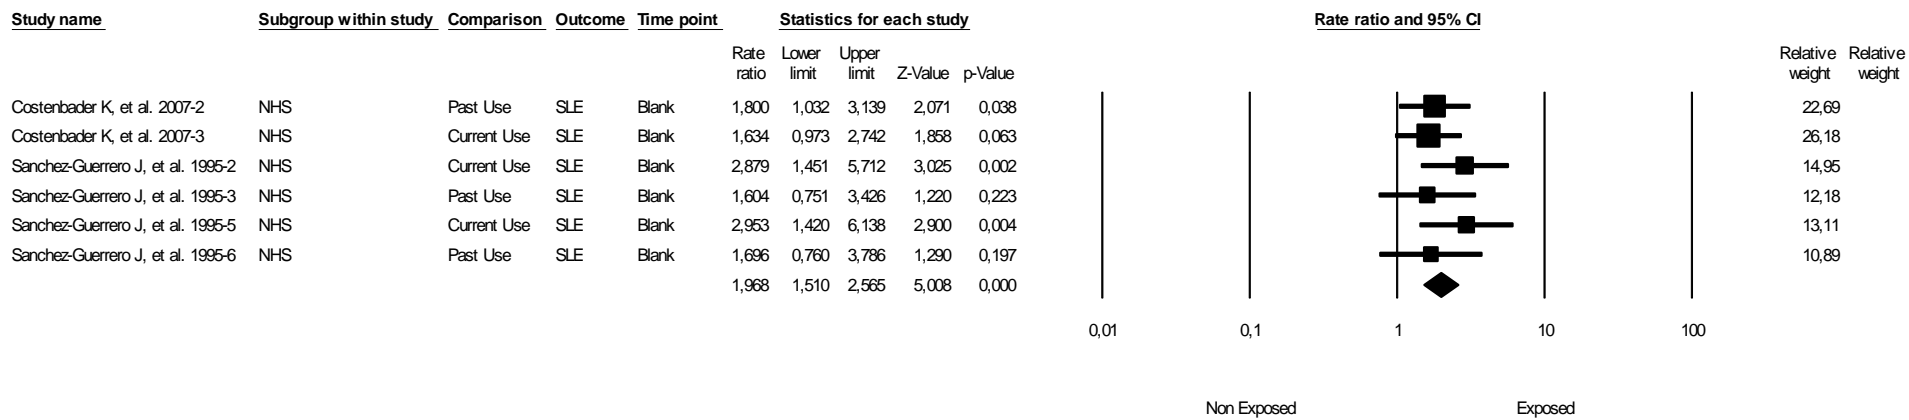



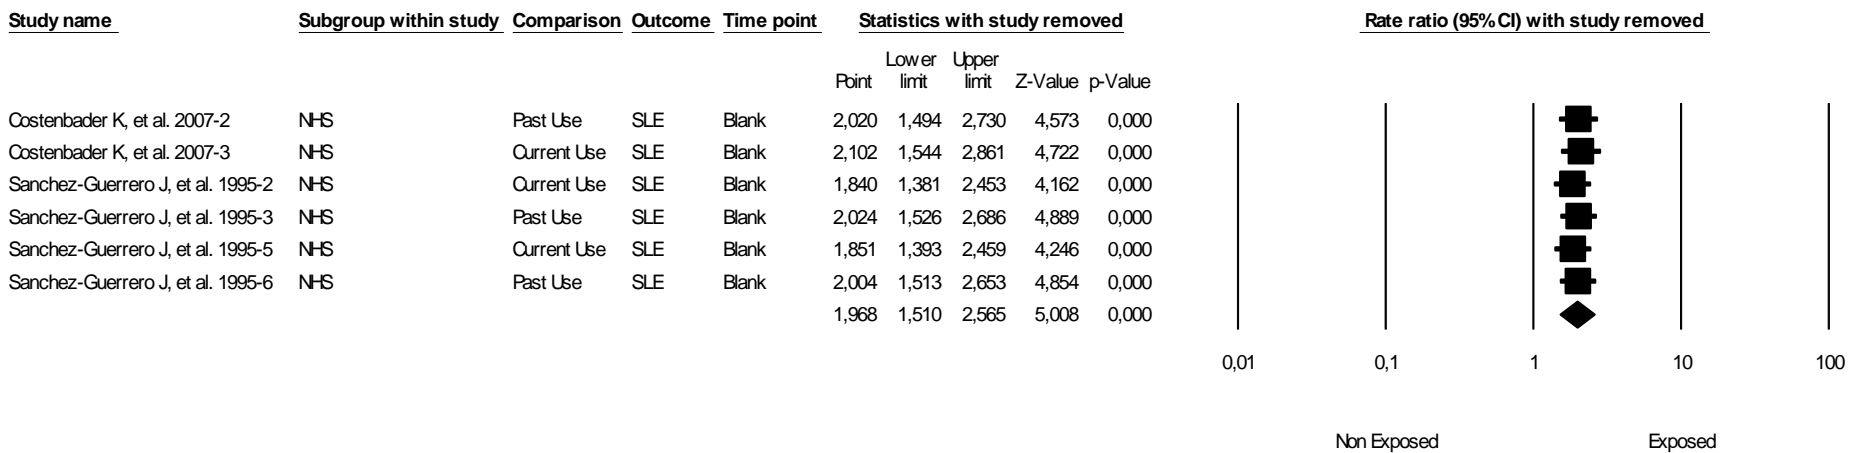

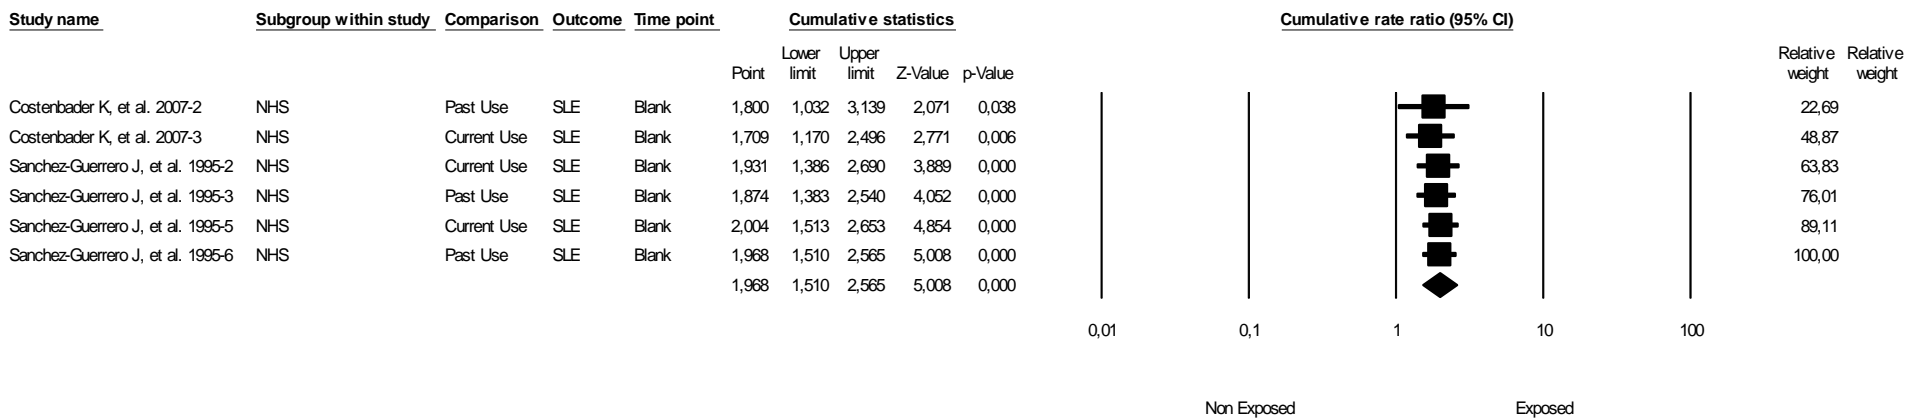

Funnel Plot of Standard Error by Log rate ratio

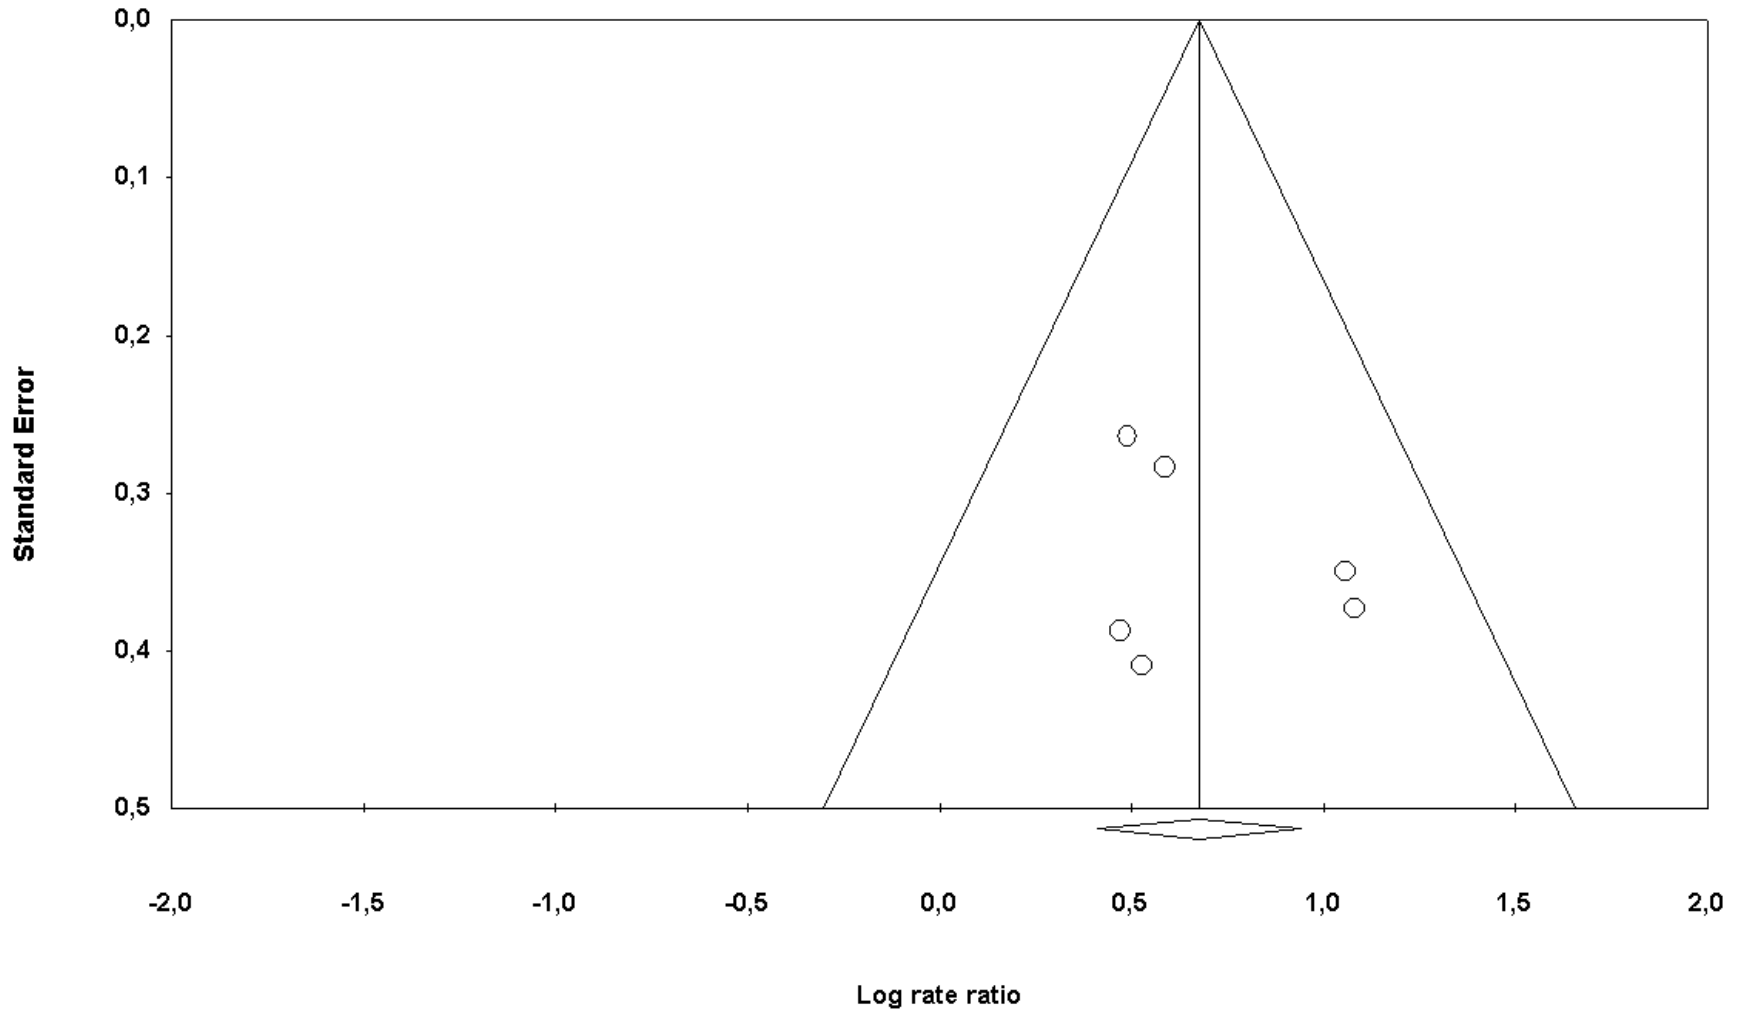

### Classic fail-safe N

|                                                               |          |
|---------------------------------------------------------------|----------|
| Z-value for observed studies                                  | 5,04691  |
| P-value for observed studies                                  | 0,00000  |
| Alpha                                                         | 0,05000  |
| Tails                                                         | 2,00000  |
| Z for alpha                                                   | 1,95996  |
| Number of observed studies                                    | 6,00000  |
| Number of missing studies that would bring p-value to > alpha | 34,00000 |

Edit

### Orwin's fail-safe N

|                                      |         |
|--------------------------------------|---------|
| Rate ratio in observed studies       | 1,96777 |
| Criterion for a 'trivial' rate ratio | 1,00000 |
| Mean rate ratio in missing studies   | 1,00000 |

Criterion must fall between other values



### **Begg and Mazumdar rank correlation**

**Kendall's S statistic (P-Q)** 1,00000

### **Kendall's tau without continuity correction**

Tau 0,06667  
z-value for tau 0,18787  
P-value (1-tailed) 0,42549  
P-value (2-tailed) 0,85098

### **Kendall's tau with continuity correction**

Tau 0,00000  
z-value for tau 0,00000  
P-value (1-tailed) 0,50000  
P-value (2-tailed) 1,00000

### **Egger's regression intercept**

|                            |          |
|----------------------------|----------|
| Intercept                  | 1,61564  |
| Standard error             | 2,11580  |
| 95% lower limit (2-tailed) | -4,25876 |
| 95% upper limit (2-tailed) | 7,49004  |
| t-value                    | 0,76361  |
| df                         | 4,00000  |
| P-value (1-tailed)         | 0,24383  |
| P-value (2-tailed)         | 0,48766  |

### Duval and Tweedie's trim and fill

|                        |                 | Fixed Effects  |             |             | Random Effects |             |             | Q Value |
|------------------------|-----------------|----------------|-------------|-------------|----------------|-------------|-------------|---------|
|                        | Studies Trimmed | Point Estimate | Lower Limit | Upper Limit | Point Estimate | Lower Limit | Upper Limit |         |
| <b>Observed values</b> |                 | 1,96777        | 1,50977     | 2,56471     | 1,96777        | 1,50977     | 2,56471     | 3,37157 |
| <b>Adjusted values</b> | 0               | 1,96777        | 1,50977     | 2,56471     | 1,96777        | 1,50977     | 2,56471     | 3,37157 |

#### Look for missing studies where?

- Not specified
- To left of mean
- To right of mean

#### Look for missing studies using which model?

- Not specified
- Fixed effect model
- Random effects model

|                 |                                                                                                                  |
|-----------------|------------------------------------------------------------------------------------------------------------------|
| <b>Articles</b> | <b>Cohort and C&amp;C<br/>HRT exposed</b>                                                                        |
| Outcomes        | SLE                                                                                                              |
| Limits          | <ul style="list-style-type: none"><li>• “current use”</li><li>• “past use”</li><li>• only ACR criteria</li></ul> |
| Effect measure  | Rate Ratio                                                                                                       |

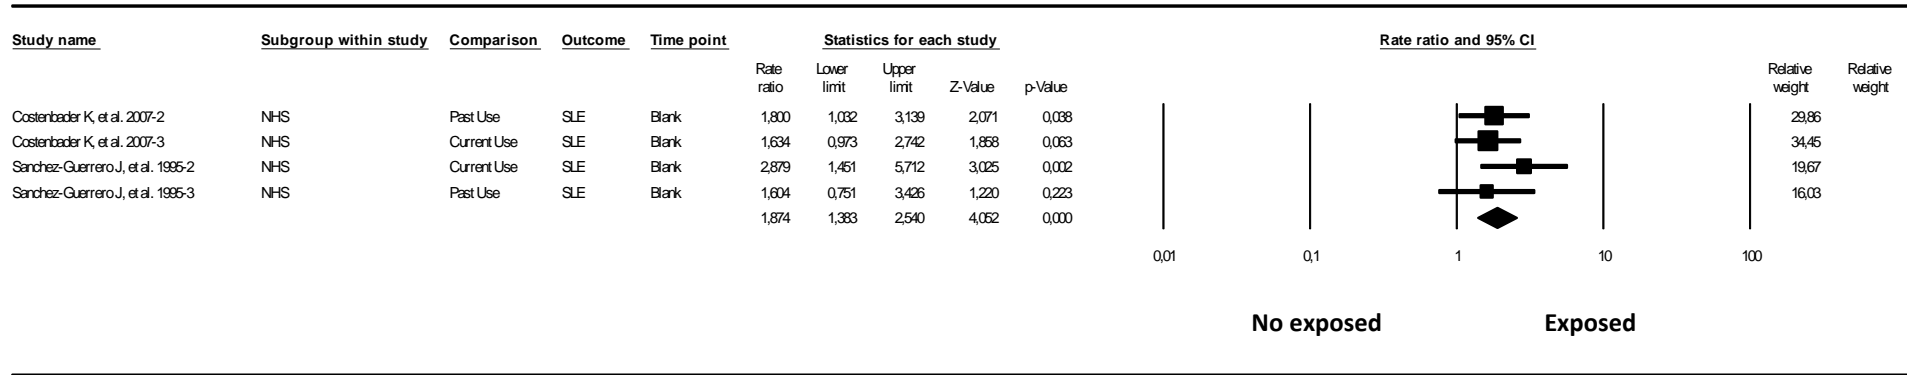



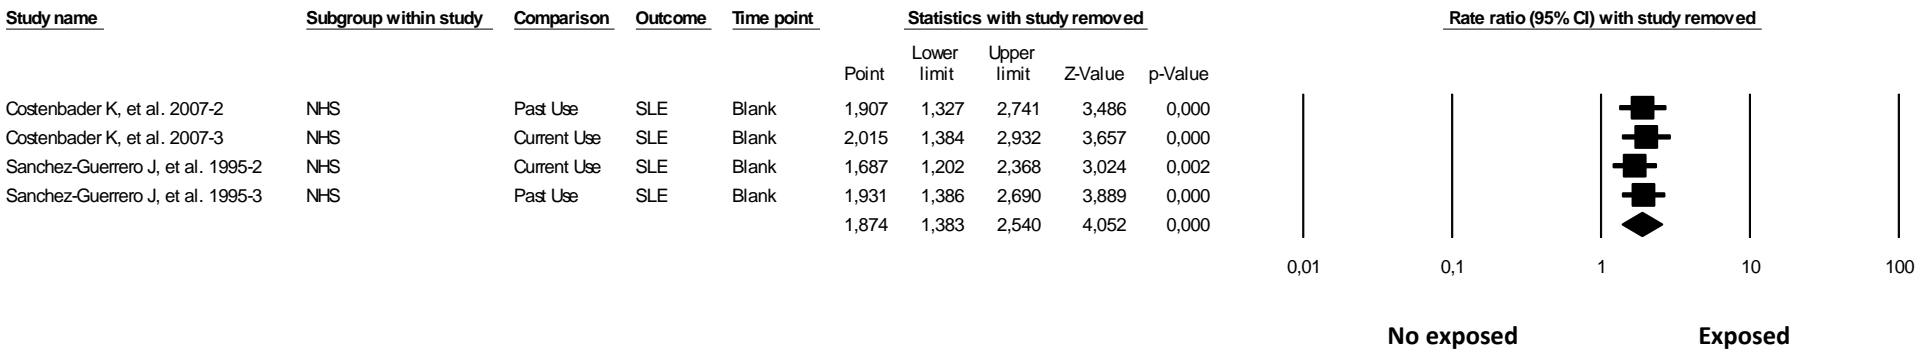

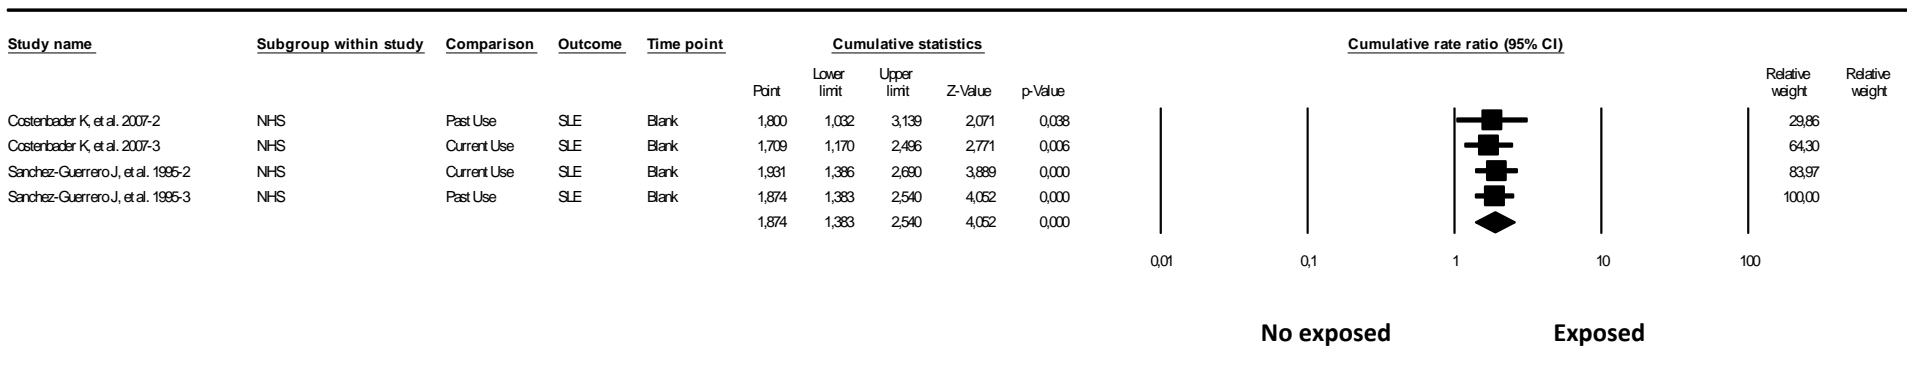



Funnel Plot of Standard Error by Log rate ratio

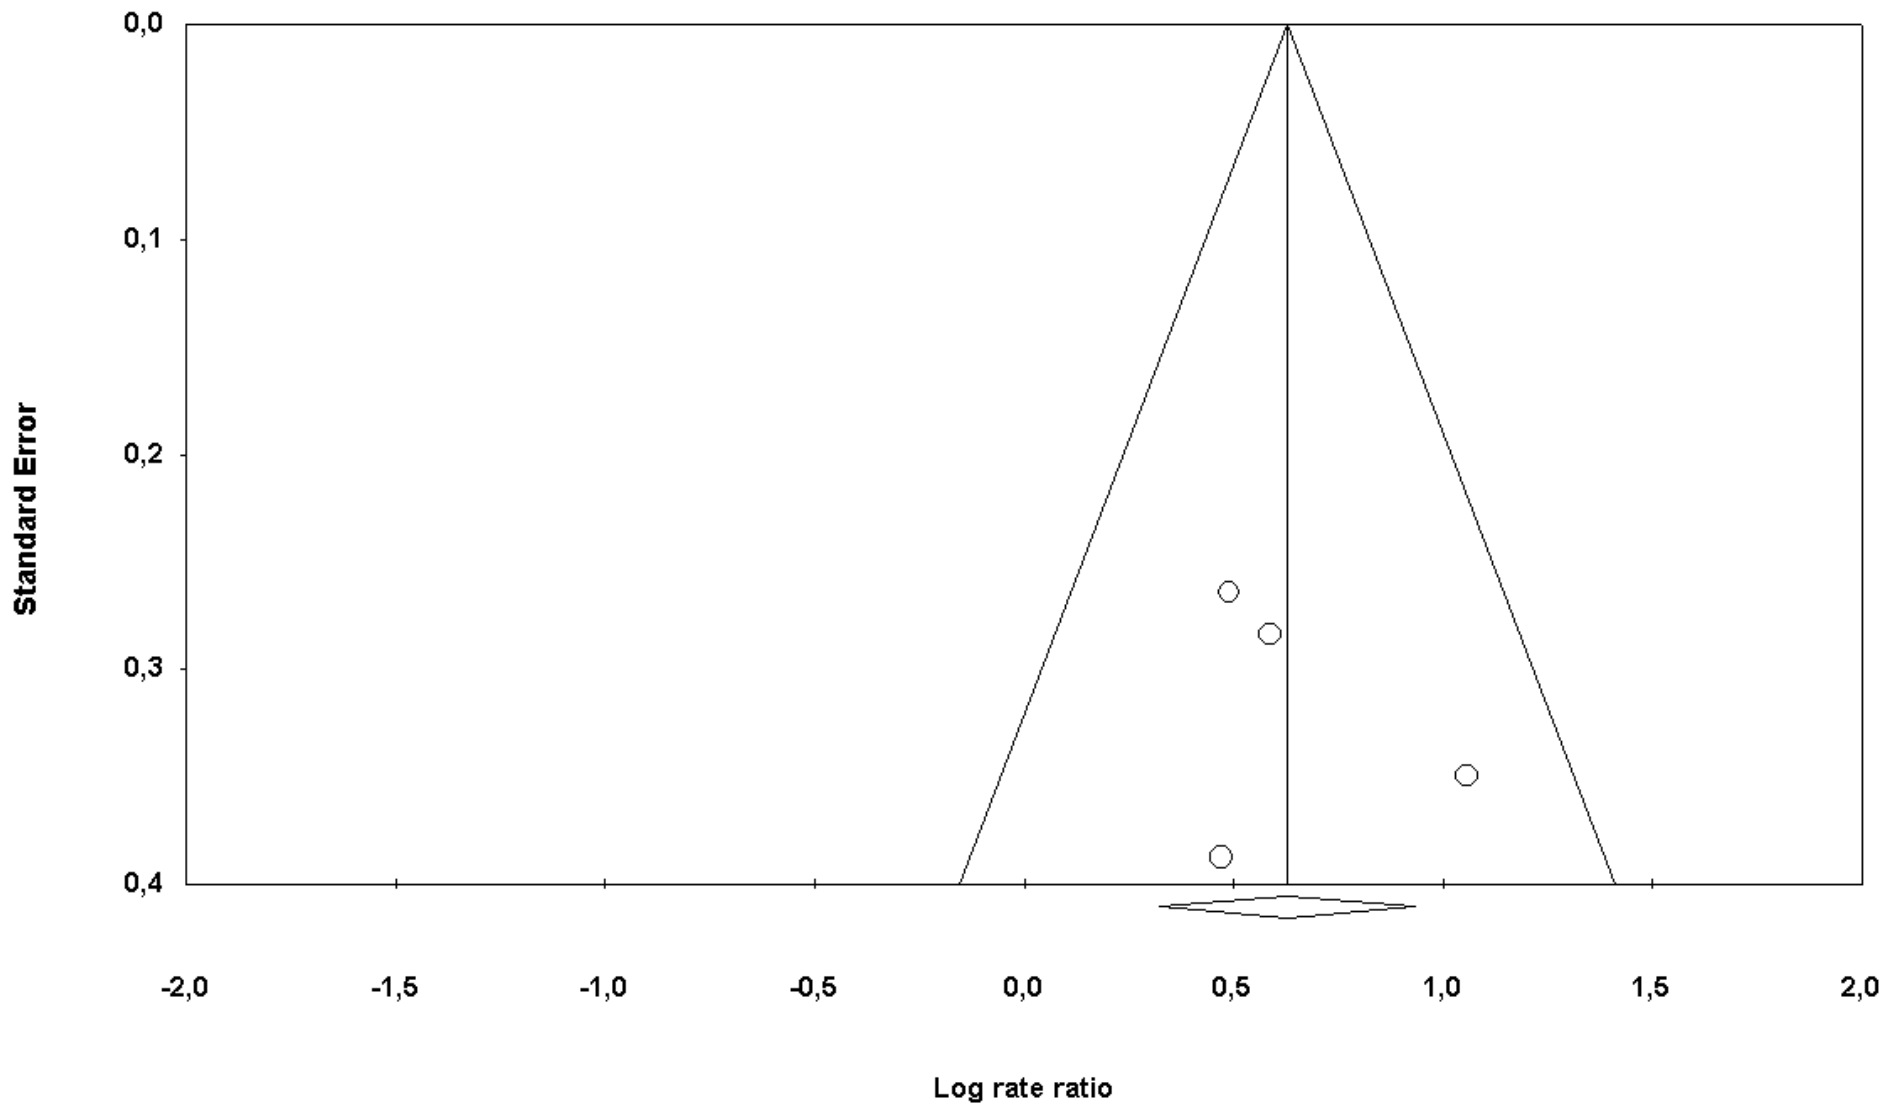

### Classic fail-safe N

|                                                               |          |
|---------------------------------------------------------------|----------|
| Z-value for observed studies                                  | 4,08640  |
| P-value for observed studies                                  | 0,00004  |
| Alpha                                                         | 0,05000  |
| Tails                                                         | 2,00000  |
| Z for alpha                                                   | 1,95996  |
| Number of observed studies                                    | 4,00000  |
| Number of missing studies that would bring p-value to > alpha | 14,00000 |

Edit

### Orwin's fail-safe N

|                                      |         |
|--------------------------------------|---------|
| Rate ratio in observed studies       | 1,87422 |
| Criterion for a 'trivial' rate ratio | 1,00000 |
| Mean rate ratio in missing studies   | 1,00000 |

Criterion must fall between other values

### **Begg and Mazumdar rank correlation**

**Kendall's S statistic (P-Q)** 2,00000

### **Kendall's tau without continuity correction**

Tau 0,33333  
z-value for tau 0,67937  
P-value (1-tailed) 0,24845  
P-value (2-tailed) 0,49691

### **Kendall's tau with continuity correction**

Tau 0,16667  
z-value for tau 0,33968  
P-value (1-tailed) 0,36705  
P-value (2-tailed) 0,73410

### **Egger's regression intercept**

|                            |           |
|----------------------------|-----------|
| Intercept                  | 1,78615   |
| Standard error             | 3,03296   |
| 95% lower limit (2-tailed) | -11,26364 |
| 95% upper limit (2-tailed) | 14,83593  |
| t-value                    | 0,58891   |
| df                         | 2,00000   |
| P-value (1-tailed)         | 0,30779   |
| P-value (2-tailed)         | 0,61558   |

### Duval and Tweedie's trim and fill

|                        |                 | Fixed Effects  |             |             | Random Effects |             |             | Q Value |
|------------------------|-----------------|----------------|-------------|-------------|----------------|-------------|-------------|---------|
|                        | Studies Trimmed | Point Estimate | Lower Limit | Upper Limit | Point Estimate | Lower Limit | Upper Limit |         |
| <b>Observed values</b> |                 | 1,87422        | 1,38306     | 2,53982     | 1,87422        | 1,38306     | 2,53982     | 1,96028 |
| <b>Adjusted values</b> | 0               | 1,87422        | 1,38306     | 2,53982     | 1,87422        | 1,38306     | 2,53982     | 1,96028 |

#### Look for missing studies where?

- Not specified
- To left of mean
- To right of mean

#### Look for missing studies using which model?

- Not specified
- Fixed effect model
- Random effects model

|                       |                                                                                                                                                |
|-----------------------|------------------------------------------------------------------------------------------------------------------------------------------------|
| <b>Articles</b>       | <b>Cohort and C&amp;C<br/>HRT exposed</b>                                                                                                      |
| <b>Outcomes</b>       | <b>SLE</b>                                                                                                                                     |
| <b>Limits</b>         | <ul style="list-style-type: none"><li>• “current use”</li><li>• “past use”</li><li>• “ever use”</li><li>• All of C&amp;C<br/>agruped</li></ul> |
| <b>Effect measure</b> | <b>OR</b>                                                                                                                                      |

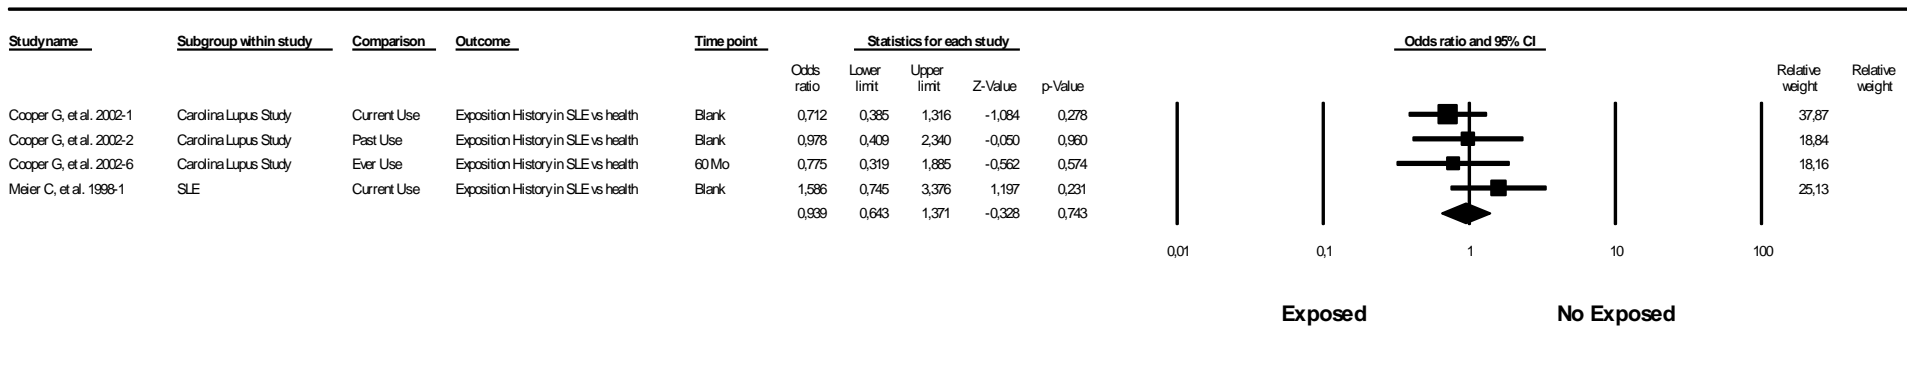





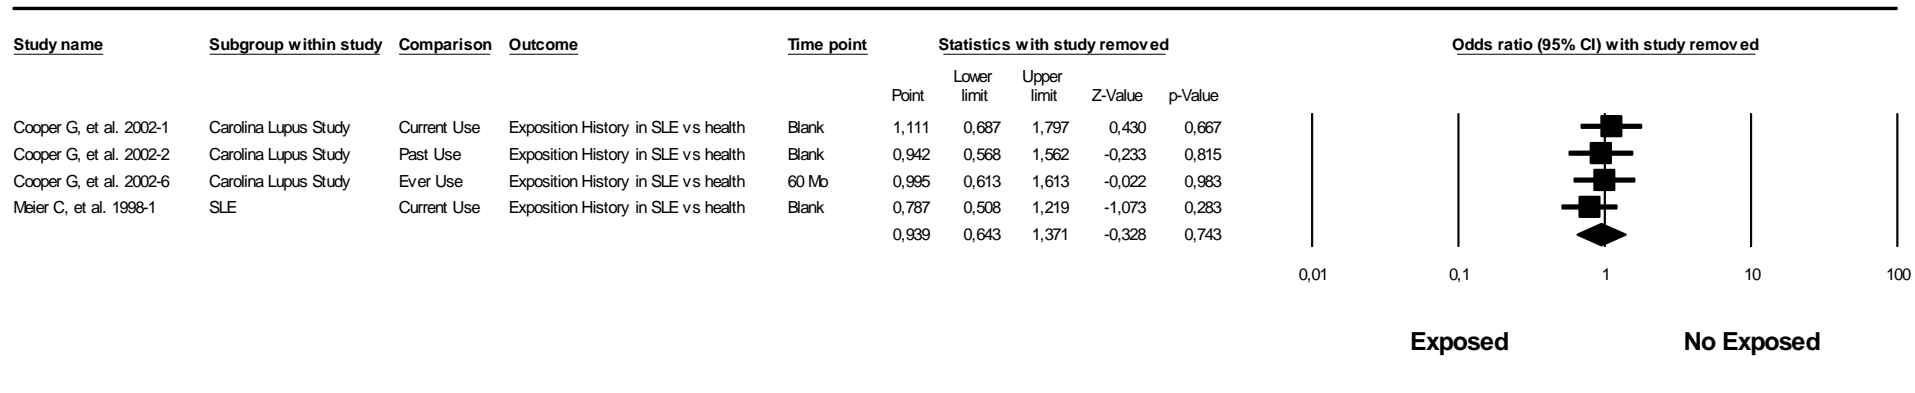

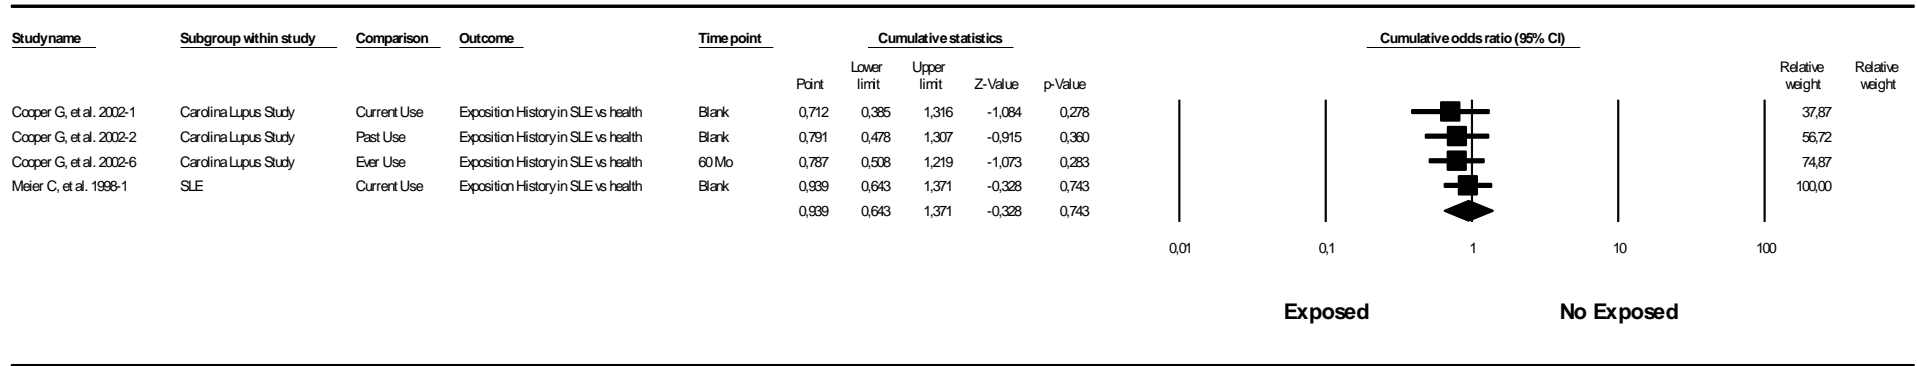

Funnel Plot of Standard Error by Log odds ratio

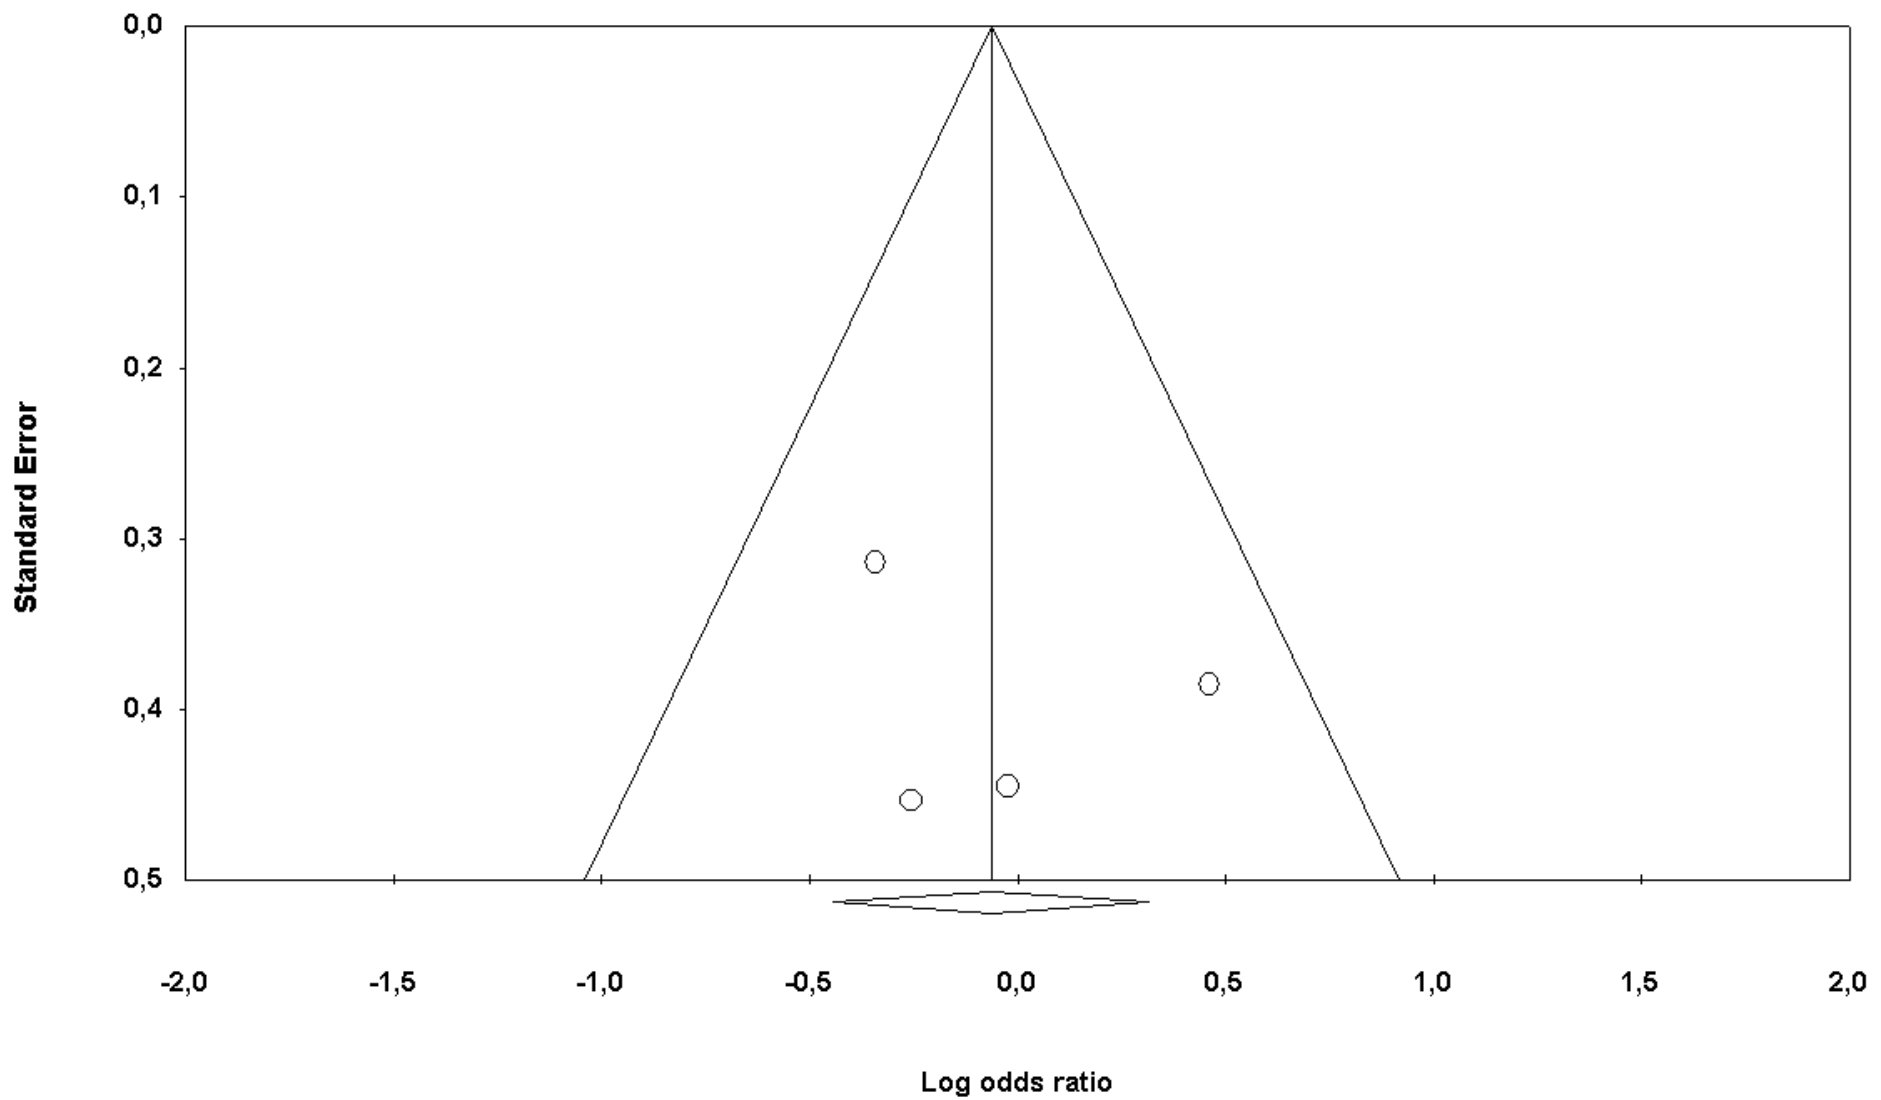

### Classic fail-safe N

|                                                                 |          |
|-----------------------------------------------------------------|----------|
| Z-value for observed studies                                    | -0,24928 |
| P-value for observed studies                                    | 0,80314  |
| Alpha                                                           | 0,05000  |
| Tails                                                           | 2,00000  |
| Z for alpha                                                     | 1,95996  |
| Number of observed studies                                      | 4,00000  |
| Number of missing studies that would bring p-value to $>$ alpha | 0,00000  |

Edit

### Orwin's fail-safe N

|                                      |         |
|--------------------------------------|---------|
| Odds ratio in observed studies       | 0,93857 |
| Criterion for a 'trivial' odds ratio | 1,00000 |
| Mean odds ratio in missing studies   | 1,00000 |

Criterion must fall between other values

### **Begg and Mazumdar rank correlation**

**Kendall's S statistic (P-Q)** 0,00000

#### **Kendall's tau without continuity correction**

Tau 0,00000  
z-value for tau 0,00000  
P-value (1-tailed) 0,50000  
P-value (2-tailed) 1,00000

#### **Kendall's tau with continuity correction**

Tau 0,00000  
z-value for tau 0,00000  
P-value (1-tailed) 0,50000  
P-value (2-tailed) 1,00000

### **Egger's regression intercept**

|                            |           |
|----------------------------|-----------|
| Intercept                  | 1,63257   |
| Standard error             | 3,74103   |
| 95% lower limit (2-tailed) | -14,46380 |
| 95% upper limit (2-tailed) | 17,72894  |
| t-value                    | 0,43640   |
| df                         | 2,00000   |
| P-value (1-tailed)         | 0,35257   |
| P-value (2-tailed)         | 0,70514   |

### Duval and Tweedie's trim and fill

|                        |                 | Fixed Effects  |             |             | Random Effects |             |             | Q Value |
|------------------------|-----------------|----------------|-------------|-------------|----------------|-------------|-------------|---------|
|                        | Studies Trimmed | Point Estimate | Lower Limit | Upper Limit | Point Estimate | Lower Limit | Upper Limit |         |
| <b>Observed values</b> |                 | 0,93857        | 0,64272     | 1,37062     | 0,93857        | 0,64272     | 1,37062     | 2,81901 |
| <b>Adjusted values</b> | 0               | 0,93857        | 0,64272     | 1,37062     | 0,93857        | 0,64272     | 1,37062     | 2,81901 |

#### Look for missing studies where?

- Not specified
- To left of mean
- To right of mean

#### Look for missing studies using which model?

- Not specified
- Fixed effect model
- Random effects model

|                 |                                                                                      |
|-----------------|--------------------------------------------------------------------------------------|
| <b>Articles</b> | <b>Cohort and C&amp;C<br/>HRT exposed</b>                                            |
| Outcomes        | SLE                                                                                  |
| Limits          | <ul style="list-style-type: none"><li>• “current use”</li><li>• “past use”</li></ul> |
| Effect measure  | OR                                                                                   |



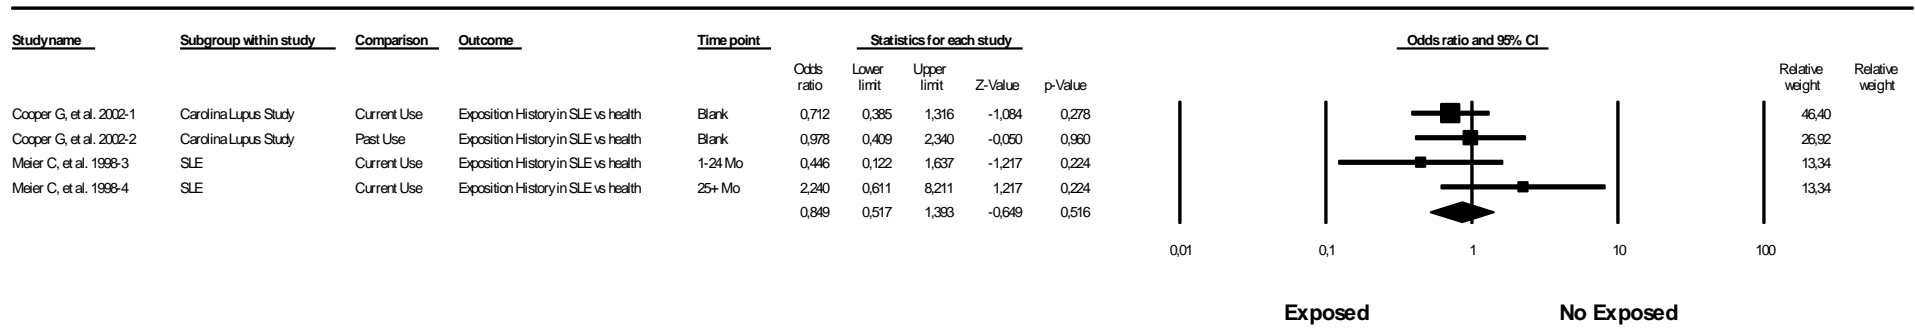



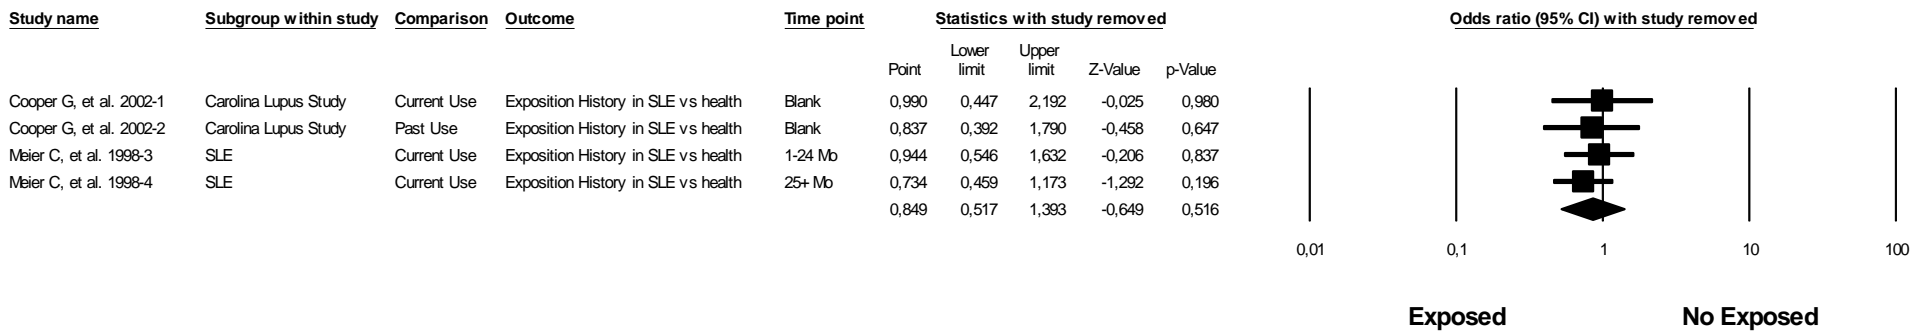

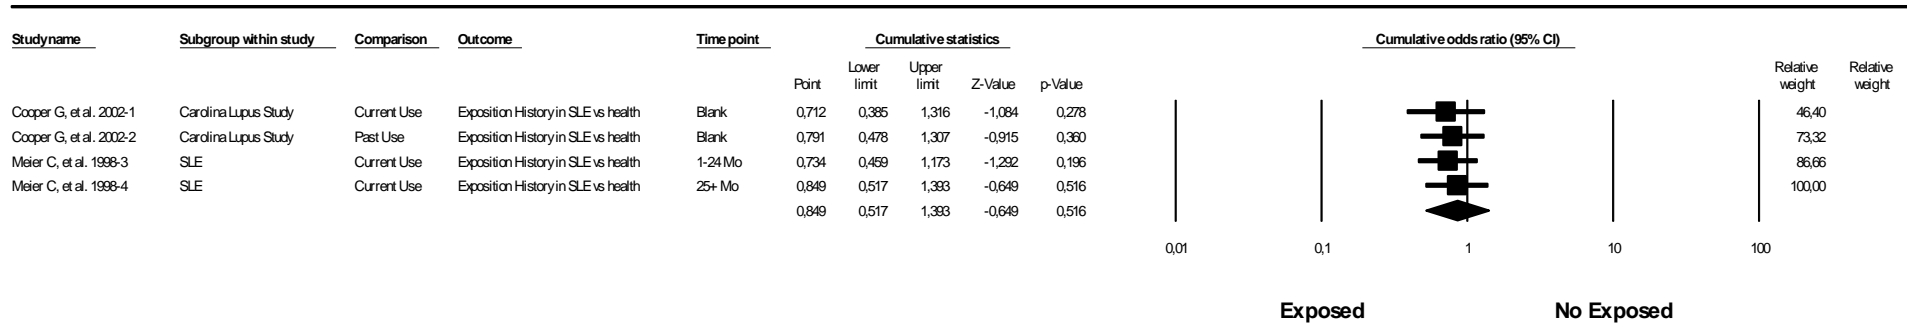

### Funnel Plot of Standard Error by Log odds ratio

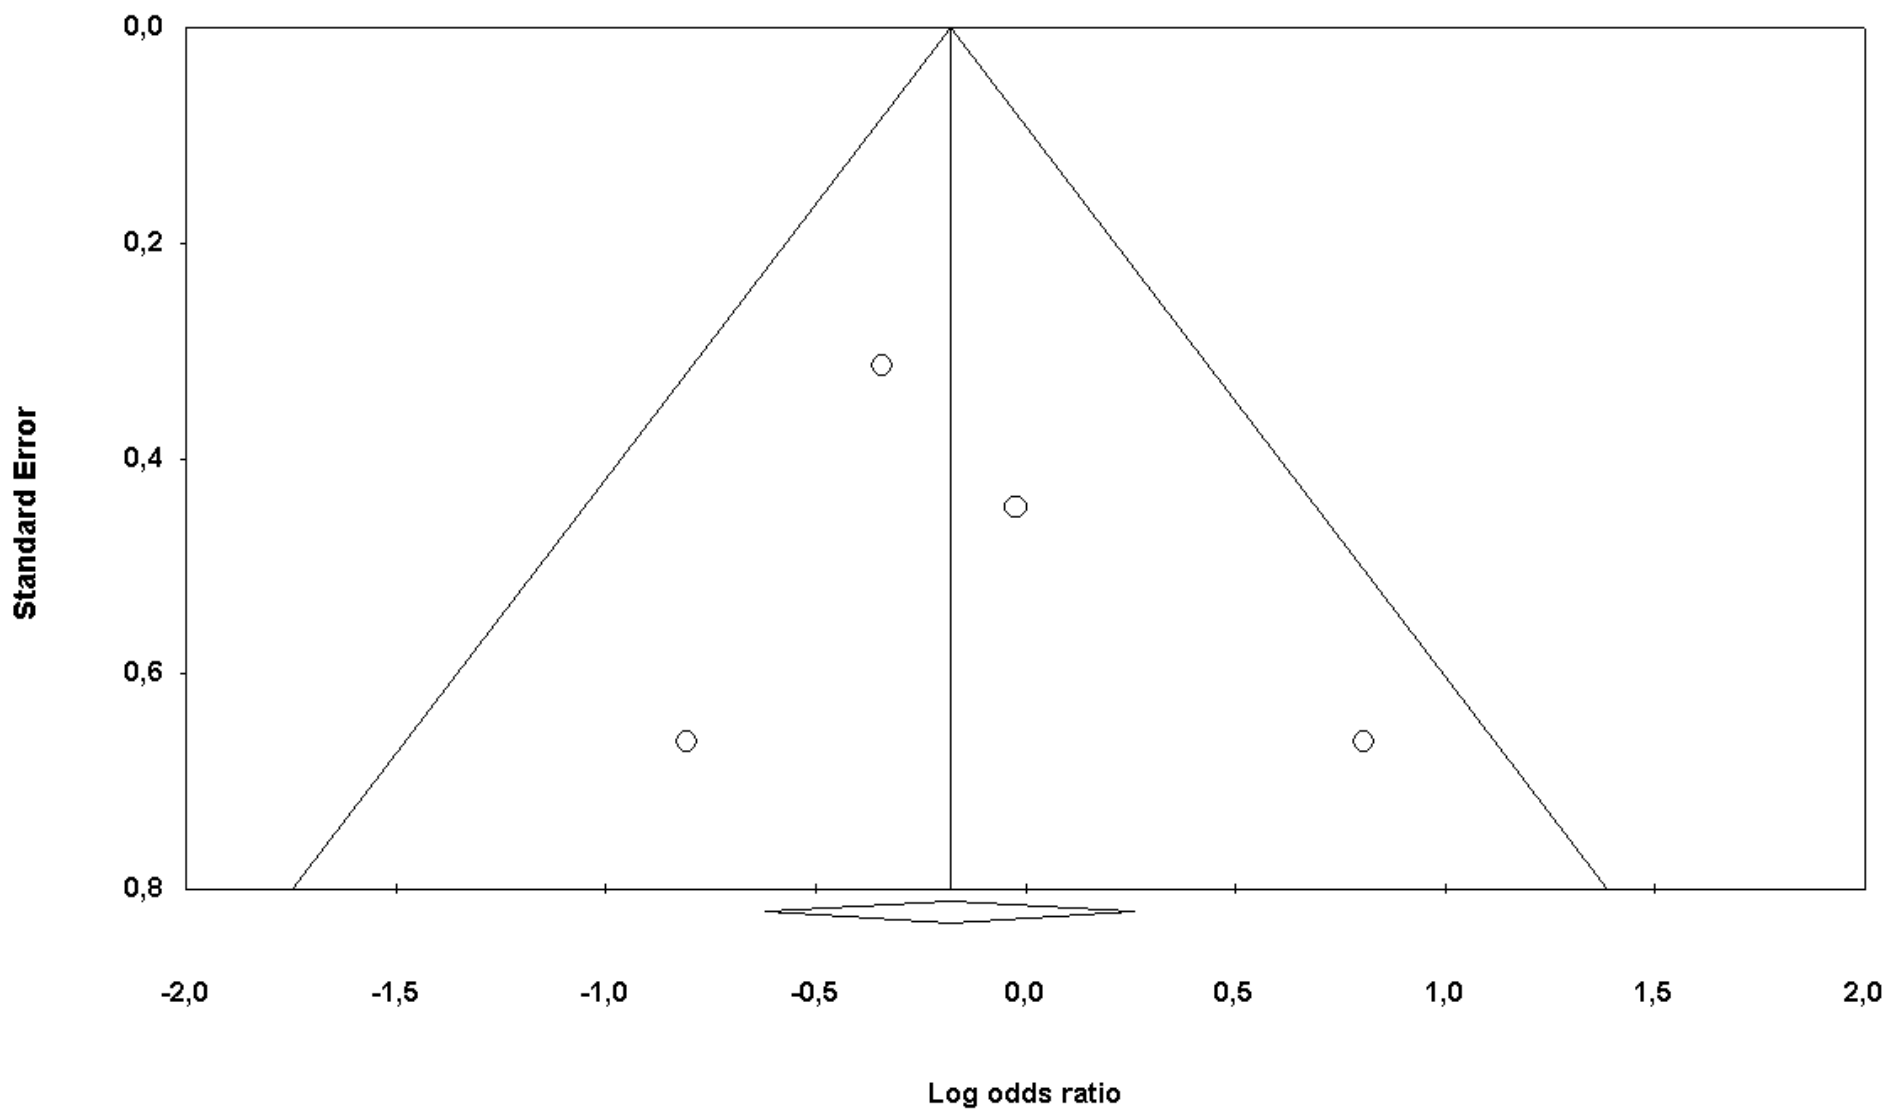

### Classic fail-safe N

|                                                               |          |
|---------------------------------------------------------------|----------|
| Z-value for observed studies                                  | -0,56711 |
| P-value for observed studies                                  | 0,57064  |
| Alpha                                                         | 0,05000  |
| Tails                                                         | 2,00000  |
| Z for alpha                                                   | 1,95996  |
| Number of observed studies                                    | 4,00000  |
| Number of missing studies that would bring p-value to > alpha | 0,00000  |

Edit

### Orwin's fail-safe N

|                                      |         |
|--------------------------------------|---------|
| Odds ratio in observed studies       | 0,83479 |
| Criterion for a 'trivial' odds ratio | 1,00000 |
| Mean odds ratio in missing studies   | 1,00000 |

Criterion must fall between other values

### **Begg and Mazumdar rank correlation**

**Kendall's S statistic (P-Q)** 1,00000

### **Kendall's tau without continuity correction**

Tau 0,16667  
z-value for tau 0,33968  
P-value (1-tailed) 0,36705  
P-value (2-tailed) 0,73410

### **Kendall's tau with continuity correction**

Tau 0,00000  
z-value for tau 0,00000  
P-value (1-tailed) 0,50000  
P-value (2-tailed) 1,00000

### **Egger's regression intercept**

|                            |          |
|----------------------------|----------|
| Intercept                  | 1,01854  |
| Standard error             | 2,00666  |
| 95% lower limit (2-tailed) | -7,61540 |
| 95% upper limit (2-tailed) | 9,65248  |
| t-value                    | 0,50758  |
| df                         | 2,00000  |
| P-value (1-tailed)         | 0,33109  |
| P-value (2-tailed)         | 0,66218  |



### Duval and Tweedie's trim and fill

|                        |                 | Fixed Effects  |             |             | Random Effects |             |             | Q Value |
|------------------------|-----------------|----------------|-------------|-------------|----------------|-------------|-------------|---------|
|                        | Studies Trimmed | Point Estimate | Lower Limit | Upper Limit | Point Estimate | Lower Limit | Upper Limit |         |
| <b>Observed values</b> |                 | 0,83479        | 0,53708     | 1,29754     | 0,84881        | 0,51738     | 1,39255     | 3,49538 |
| <b>Adjusted values</b> | 0               | 0,83479        | 0,53708     | 1,29754     | 0,84881        | 0,51738     | 1,39255     | 3,49538 |

#### Look for missing studies where?

- Not specified
- To left of mean
- To right of mean

#### Look for missing studies using which model?

- Not specified
- Fixed effect model
- Random effects model

|                 |                               |
|-----------------|-------------------------------|
| <b>Articles</b> | <b>SLE RCT exposed to HRT</b> |
| Outcomes        | Multiple flares               |
| Limits          | 12 and 24 months              |
| Effect measure  | Std Difference means          |

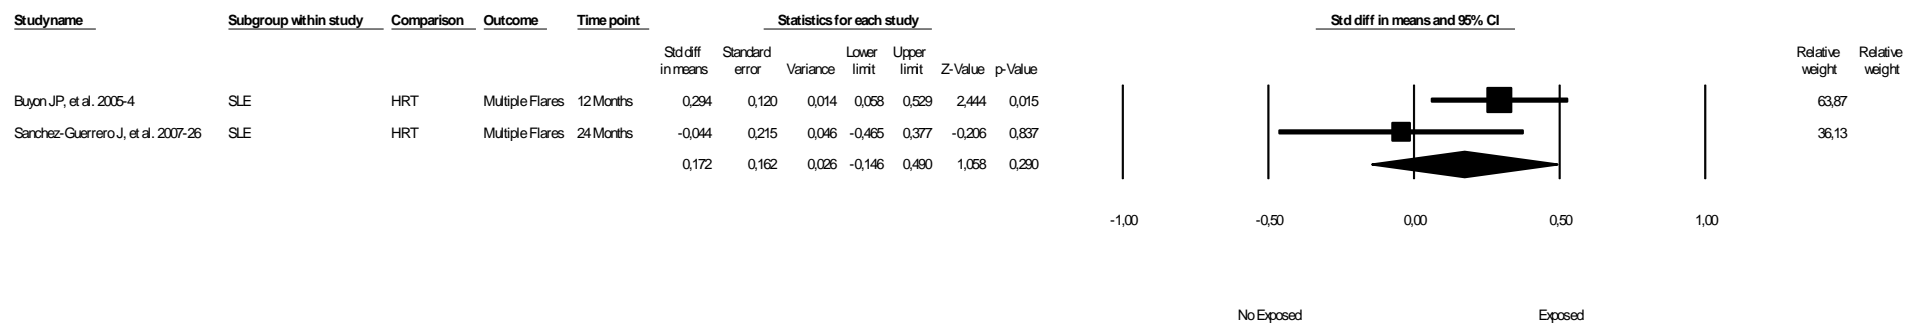



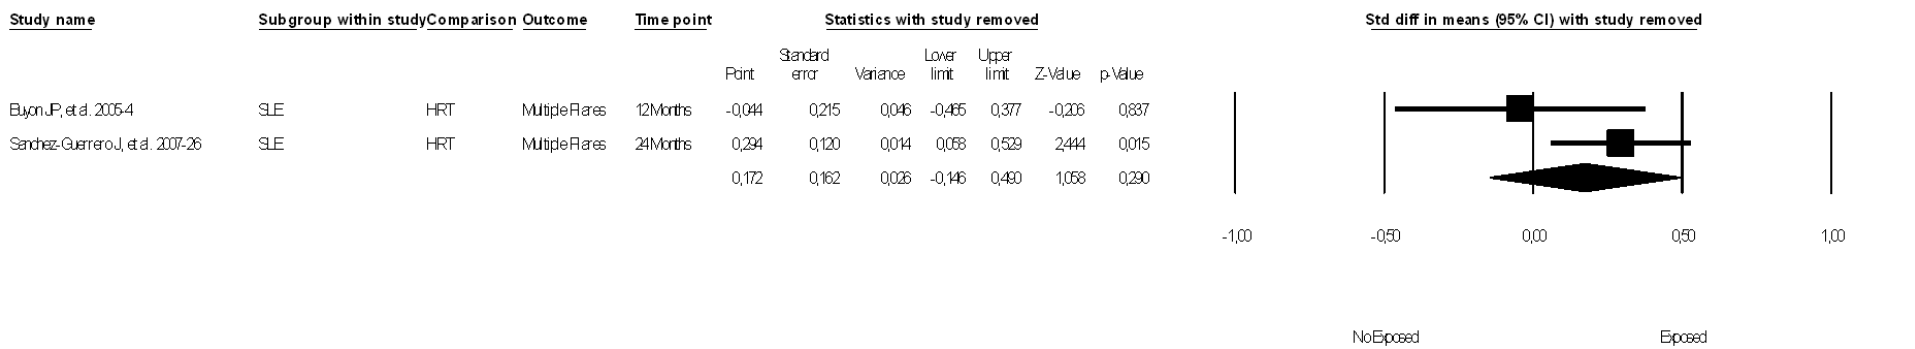

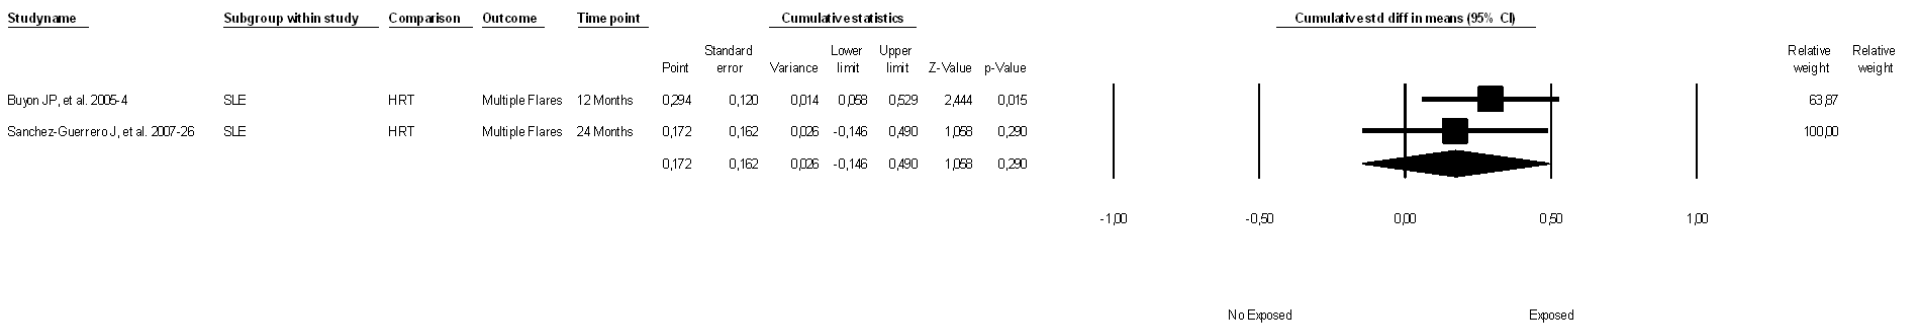

There are not enough data to realice Funnel Plot and the others estimates

|                 |                               |
|-----------------|-------------------------------|
| <b>Articles</b> | <b>SLE RCT exposed to HRT</b> |
| Outcomes        | Major Flares                  |
| Limits          | SLE                           |
| Effect measure  | RR                            |



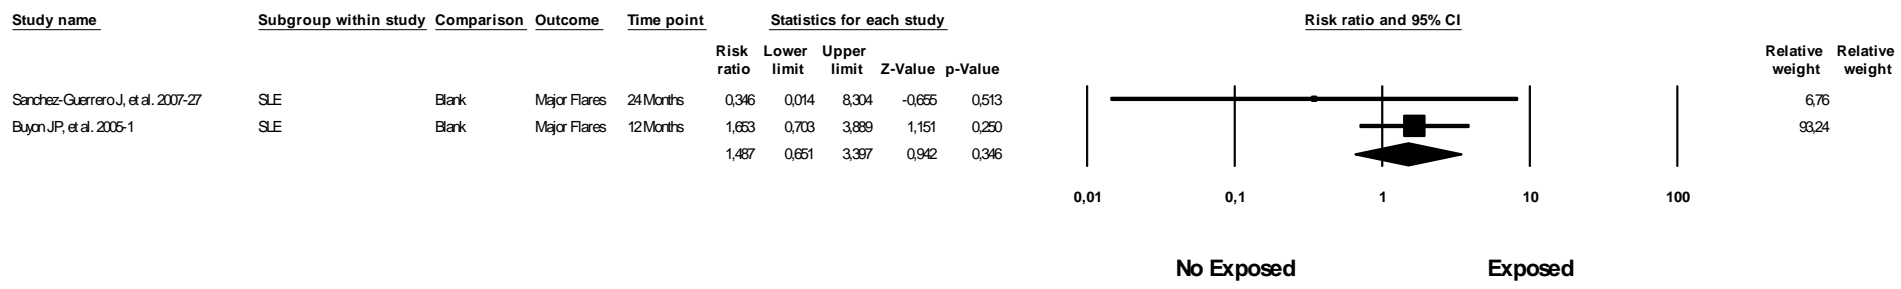



| Study name                         | Subgroup within study | Comparison | Outcome      | Time point | Statistics with study removed |             |             |         |         |
|------------------------------------|-----------------------|------------|--------------|------------|-------------------------------|-------------|-------------|---------|---------|
|                                    |                       |            |              |            | Point                         | Lower limit | Upper limit | Z-Value | p-Value |
| Sanchez-Guerrero J, et al. 2007-27 | SLE                   | Blank      | Major Flares | 24 Months  | 1,653                         | 0,703       | 3,889       | 1,151   | 0,250   |
| Buyon JP, et al. 2005-1            | SLE                   | Blank      | Major Flares | 12 Months  | 0,346                         | 0,014       | 8,304       | -0,655  | 0,513   |
|                                    |                       |            |              |            | 1,487                         | 0,651       | 3,397       | 0,942   | 0,346   |

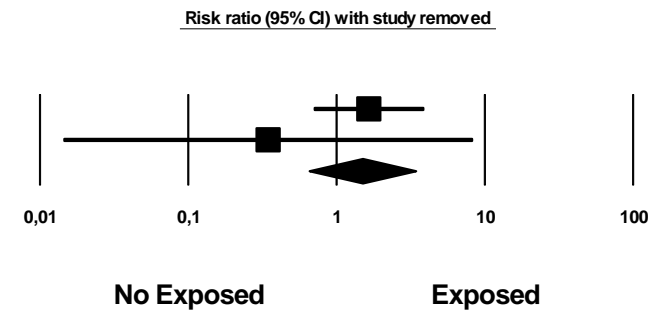

| Study name                         | Subgroup within study | Comparison | Outcome      | Time point | Cumulative statistics |             |             |         |         |
|------------------------------------|-----------------------|------------|--------------|------------|-----------------------|-------------|-------------|---------|---------|
|                                    |                       |            |              |            | Point                 | Lower limit | Upper limit | Z-Value | p-Value |
| Sanchez-Guerrero J, et al. 2007-27 | SLE                   | Blank      | Major Flares | 24 Months  | 0,346                 | 0,014       | 8,304       | -0,655  | 0,513   |
| Buyon JP, et al. 2005-1            | SLE                   | Blank      | Major Flares | 12 Months  | 1,487                 | 0,651       | 3,397       | 0,942   | 0,346   |
|                                    |                       |            |              |            | 1,487                 | 0,651       | 3,397       | 0,942   | 0,346   |

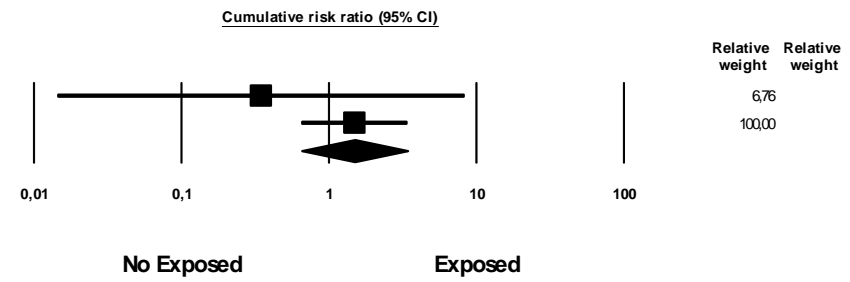

There are not enough data to realize Funnel Plot and the others estimates

|                 |                                               |
|-----------------|-----------------------------------------------|
| <b>Articles</b> | <b>SLE C&amp;C and RCT<br/>exposed to HRT</b> |
| Outcomes        | Flares                                        |
| Limits          | SLE                                           |
| Effect measure  | OR                                            |

| Study name                         | Subgroup within study | Comparison | Outcome    | Time point | Statistics for each study |             |             |         |         |
|------------------------------------|-----------------------|------------|------------|------------|---------------------------|-------------|-------------|---------|---------|
|                                    |                       |            |            |            | Odds ratio                | Lower limit | Upper limit | Z-Value | p-Value |
| Arden NK, et al. 1994-1            | SLE                   | HRT        | All Flares | 12 Months  | 0,286                     | 0,053       | 1,549       | -1,452  | 0,146   |
| Kreidstein S, et al. 1997-4        | SLE                   | HRT        | All Flares | 12+ Mo     | 1,000                     | 0,290       | 3,454       | 0,000   | 1,000   |
| Sanchez-Guerrero J, et al. 2007-25 | SLE                   | HRT        | All Flares | 24 Months  | 2,115                     | 0,810       | 5,526       | 1,529   | 0,126   |
|                                    |                       |            |            |            | 1,010                     | 0,352       | 2,901       | 0,019   | 0,985   |

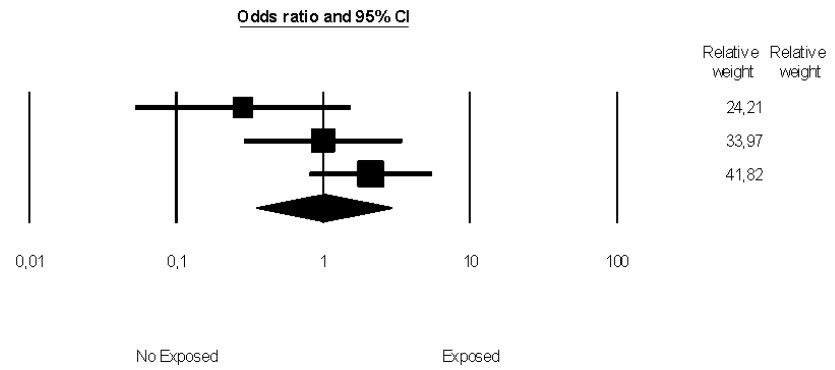





| Study name                         | Subgroup within study | Comparison | Outcome    | Time point | Statistics with study removed |             |             |         |         |
|------------------------------------|-----------------------|------------|------------|------------|-------------------------------|-------------|-------------|---------|---------|
|                                    |                       |            |            |            | Point                         | Lower limit | Upper limit | Z-Value | p-Value |
| Arden NK, et al. 1994-1            | SLE                   | HRT        | All Flares | 12 Months  | 1,597                         | 0,748       | 3,412       | 1,209   | 0,227   |
| Kreidstein S, et al. 1997-4        | SLE                   | HRT        | All Flares | 12+ Mb     | 0,882                         | 0,126       | 6,175       | -0,127  | 0,899   |
| Sanchez-Guerrero J, et al. 2007-25 | SLE                   | HRT        | All Flares | 24 Mbnths  | 0,613                         | 0,185       | 2,031       | -0,800  | 0,424   |
|                                    |                       |            |            |            | 1,010                         | 0,352       | 2,901       | 0,019   | 0,985   |

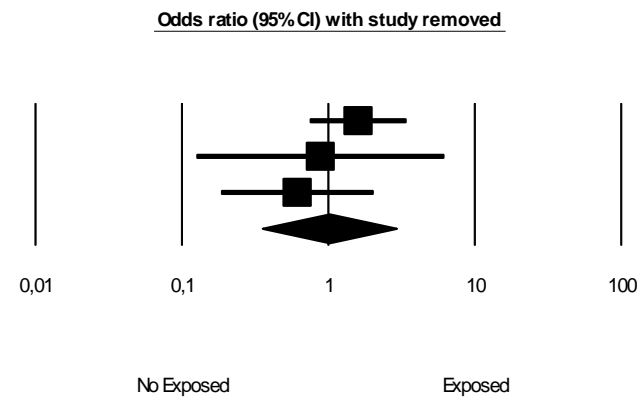

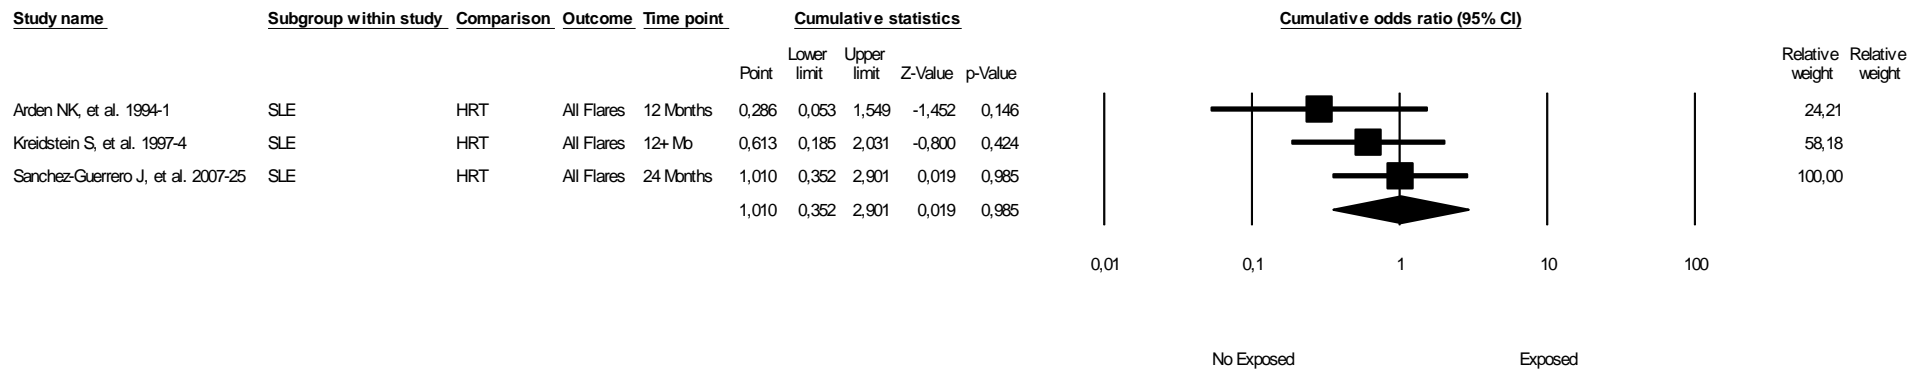

Funnel Plot of Standard Error by Log odds ratio

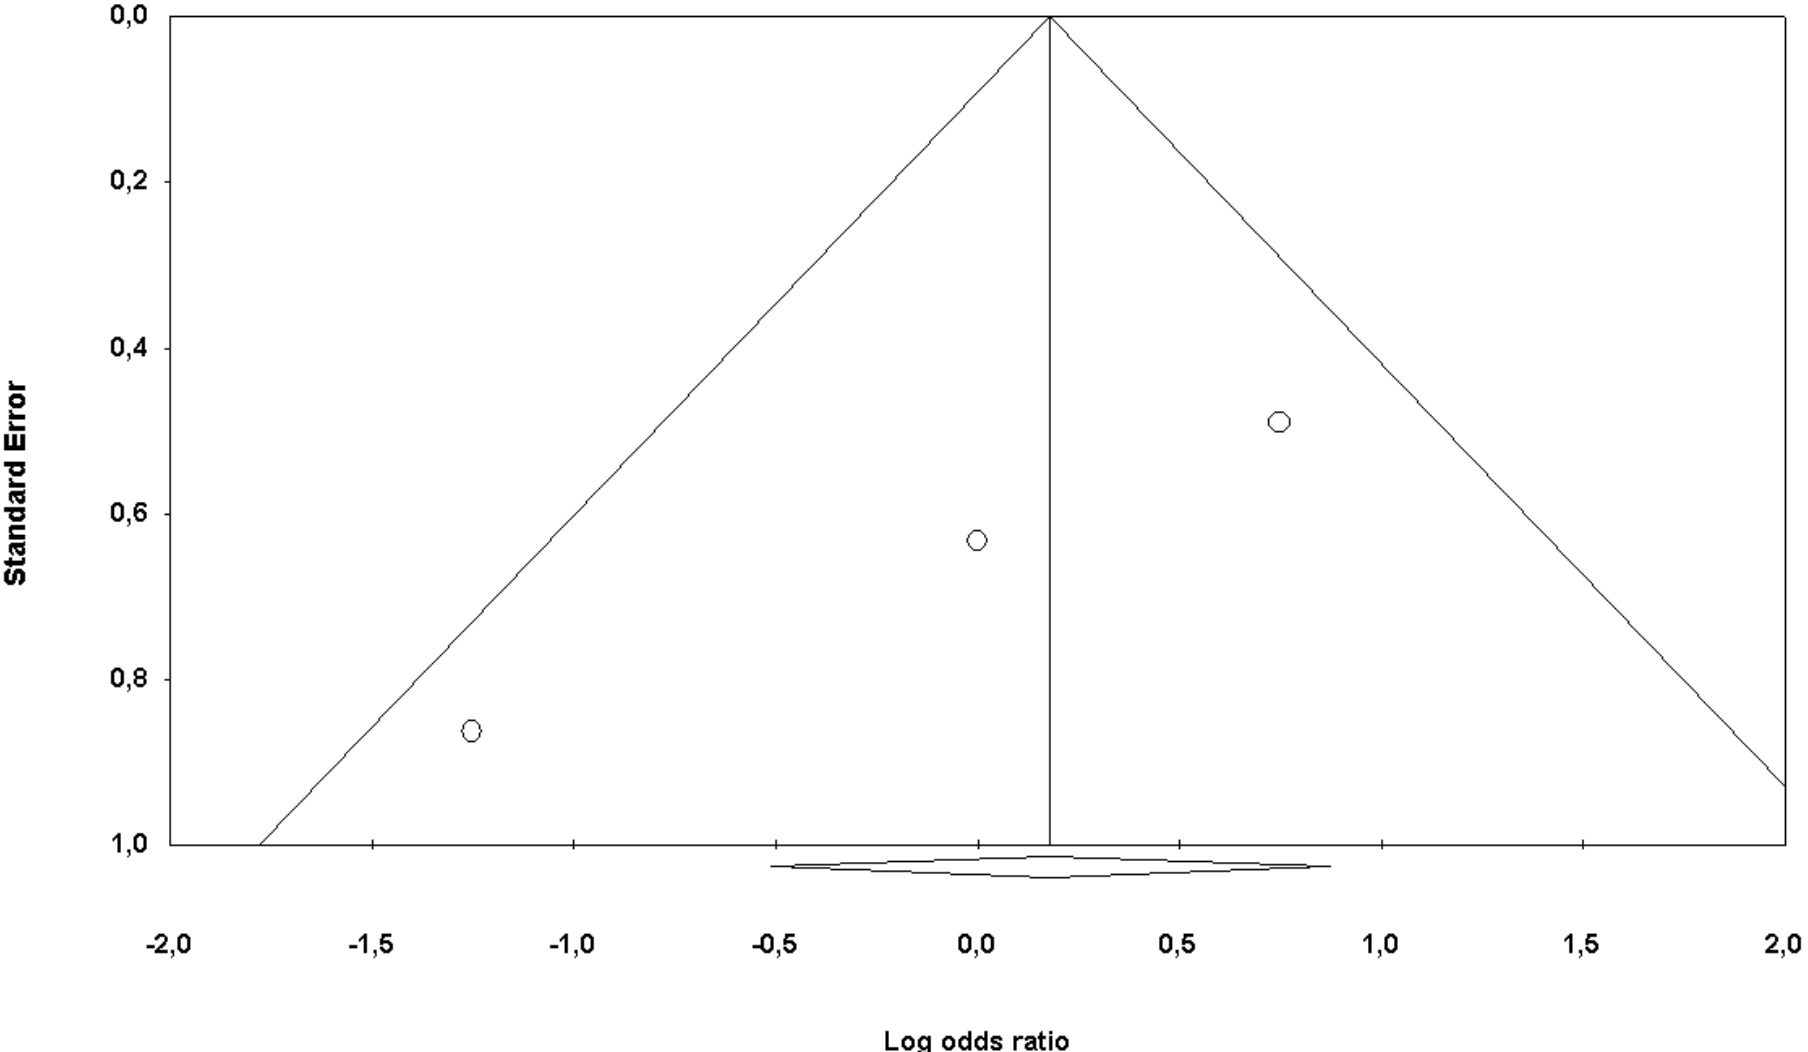

### Classic fail-safe N

|                                                               |         |
|---------------------------------------------------------------|---------|
| Z-value for observed studies                                  | 0,04441 |
| P-value for observed studies                                  | 0,96458 |
| Alpha                                                         | 0,05000 |
| Tails                                                         | 2,00000 |
| Z for alpha                                                   | 1,95996 |
| Number of observed studies                                    | 3,00000 |
| Number of missing studies that would bring p-value to > alpha | 0,00000 |

Edit

### Orwin's fail-safe N

|                                      |         |
|--------------------------------------|---------|
| Odds ratio in observed studies       | 1,19660 |
| Criterion for a 'trivial' odds ratio | 1,00000 |
| Mean odds ratio in missing studies   | 1,00000 |

Criterion must fall between other values

Edit

### **Begg and Mazumdar rank correlation**

**Kendall's S statistic (P-Q)** -3,00000

### **Kendall's tau without continuity correction**

Tau -1,00000  
z-value for tau 1,56670  
P-value (1-tailed) 0,05859  
P-value (2-tailed) 0,11719

### **Kendall's tau with continuity correction**

Tau -0,66667  
z-value for tau 1,04447  
P-value (1-tailed) 0,14813  
P-value (2-tailed) 0,29627

### **Egger's regression intercept**

|                            |          |
|----------------------------|----------|
| Intercept                  | -5,36234 |
| Standard error             | 0,05559  |
| 95% lower limit (2-tailed) | -6,06870 |
| 95% upper limit (2-tailed) | -4,65597 |
| t-value                    | 96,45840 |
| df                         | 1,00000  |
| P-value (1-tailed)         | 0,00330  |
| P-value (2-tailed)         | 0,00660  |

### Duval and Tweedie's trim and fill

|                        |                 | Fixed Effects  |             |             | Random Effects |             |             | Q Value |
|------------------------|-----------------|----------------|-------------|-------------|----------------|-------------|-------------|---------|
|                        | Studies Trimmed | Point Estimate | Lower Limit | Upper Limit | Point Estimate | Lower Limit | Upper Limit |         |
| <b>Observed values</b> |                 | 1,19660        | 0,59867     | 2,39171     | 1,01012        | 0,35174     | 2,90085     | 4,18990 |
| <b>Adjusted values</b> | 0               | 1,19660        | 0,59867     | 2,39171     | 1,01012        | 0,35174     | 2,90085     | 4,18990 |

#### Look for missing studies where?

- Not specified
- To left of mean
- To right of mean

#### Look for missing studies using which model?

- Not specified
- Fixed effect model
- Random effects model

|                 |                                               |
|-----------------|-----------------------------------------------|
| <b>Articles</b> | <b>SLE C&amp;C and RCT<br/>exposed to HRT</b> |
| Outcomes        | Thrombosis                                    |
| Limits          | SLE                                           |
| Effect measure  | OR                                            |



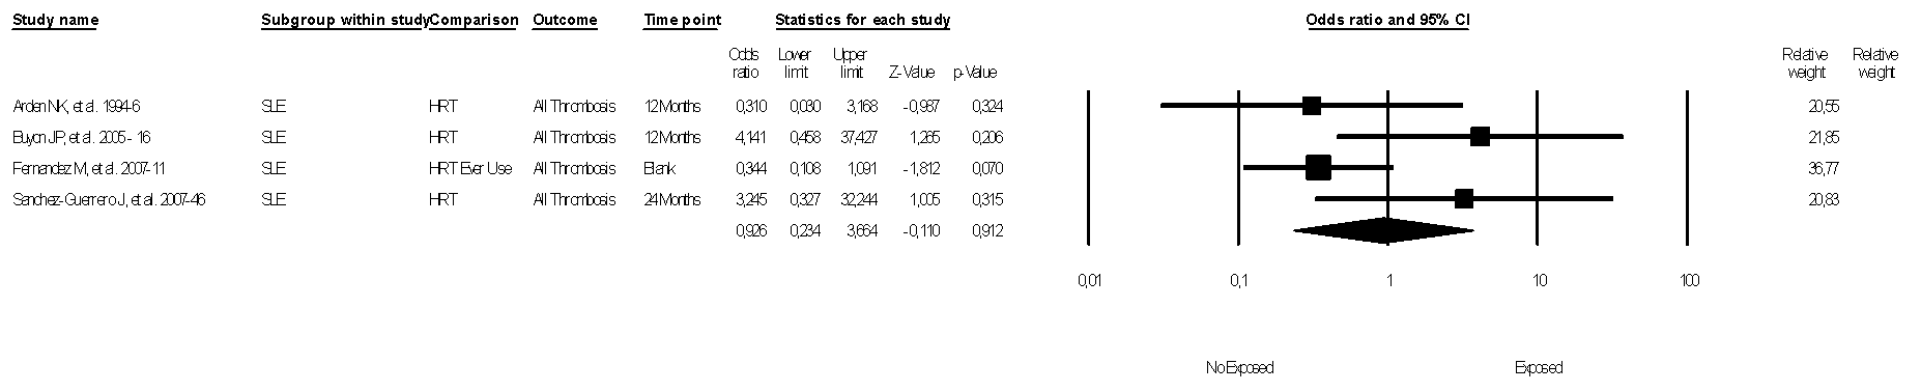



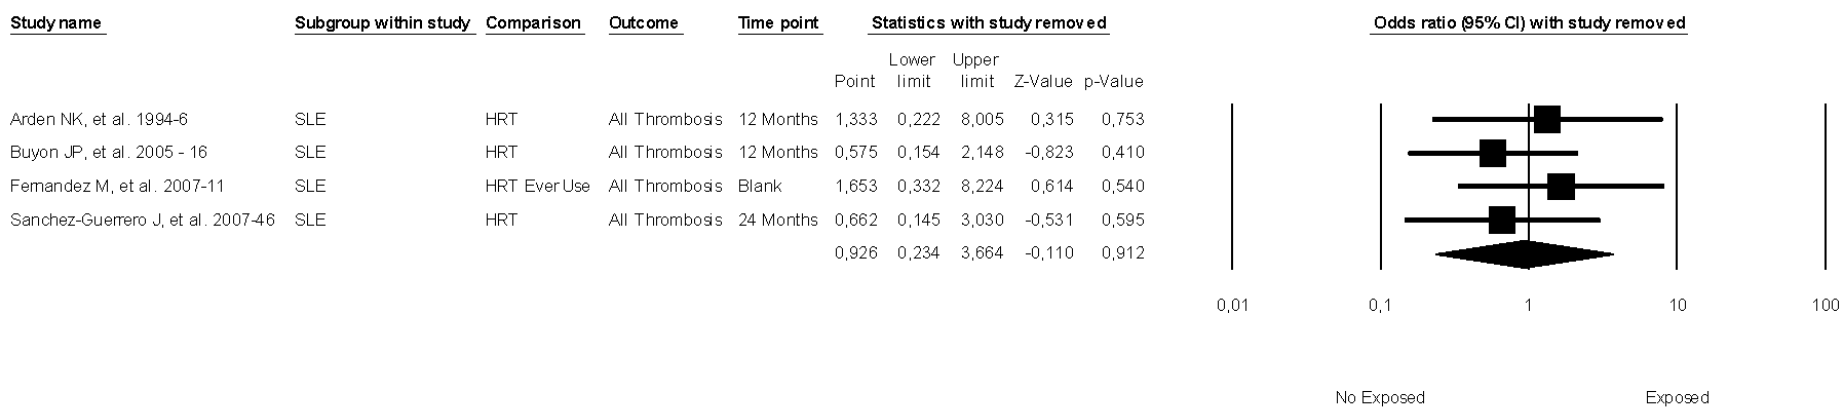

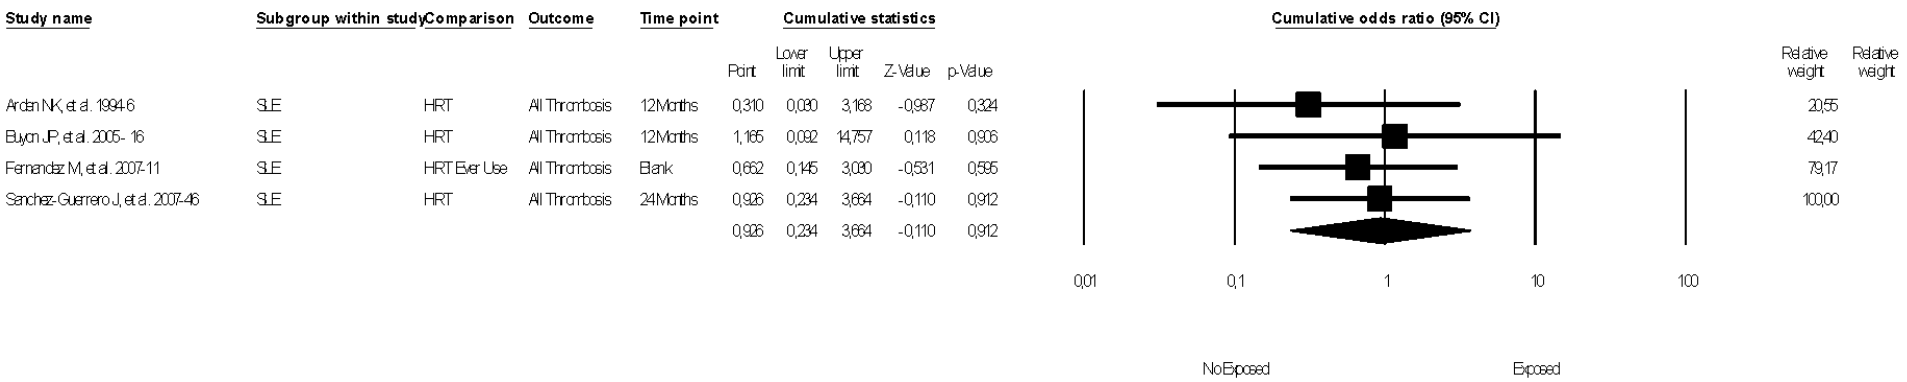

### Funnel Plot of Standard Error by Log odds ratio

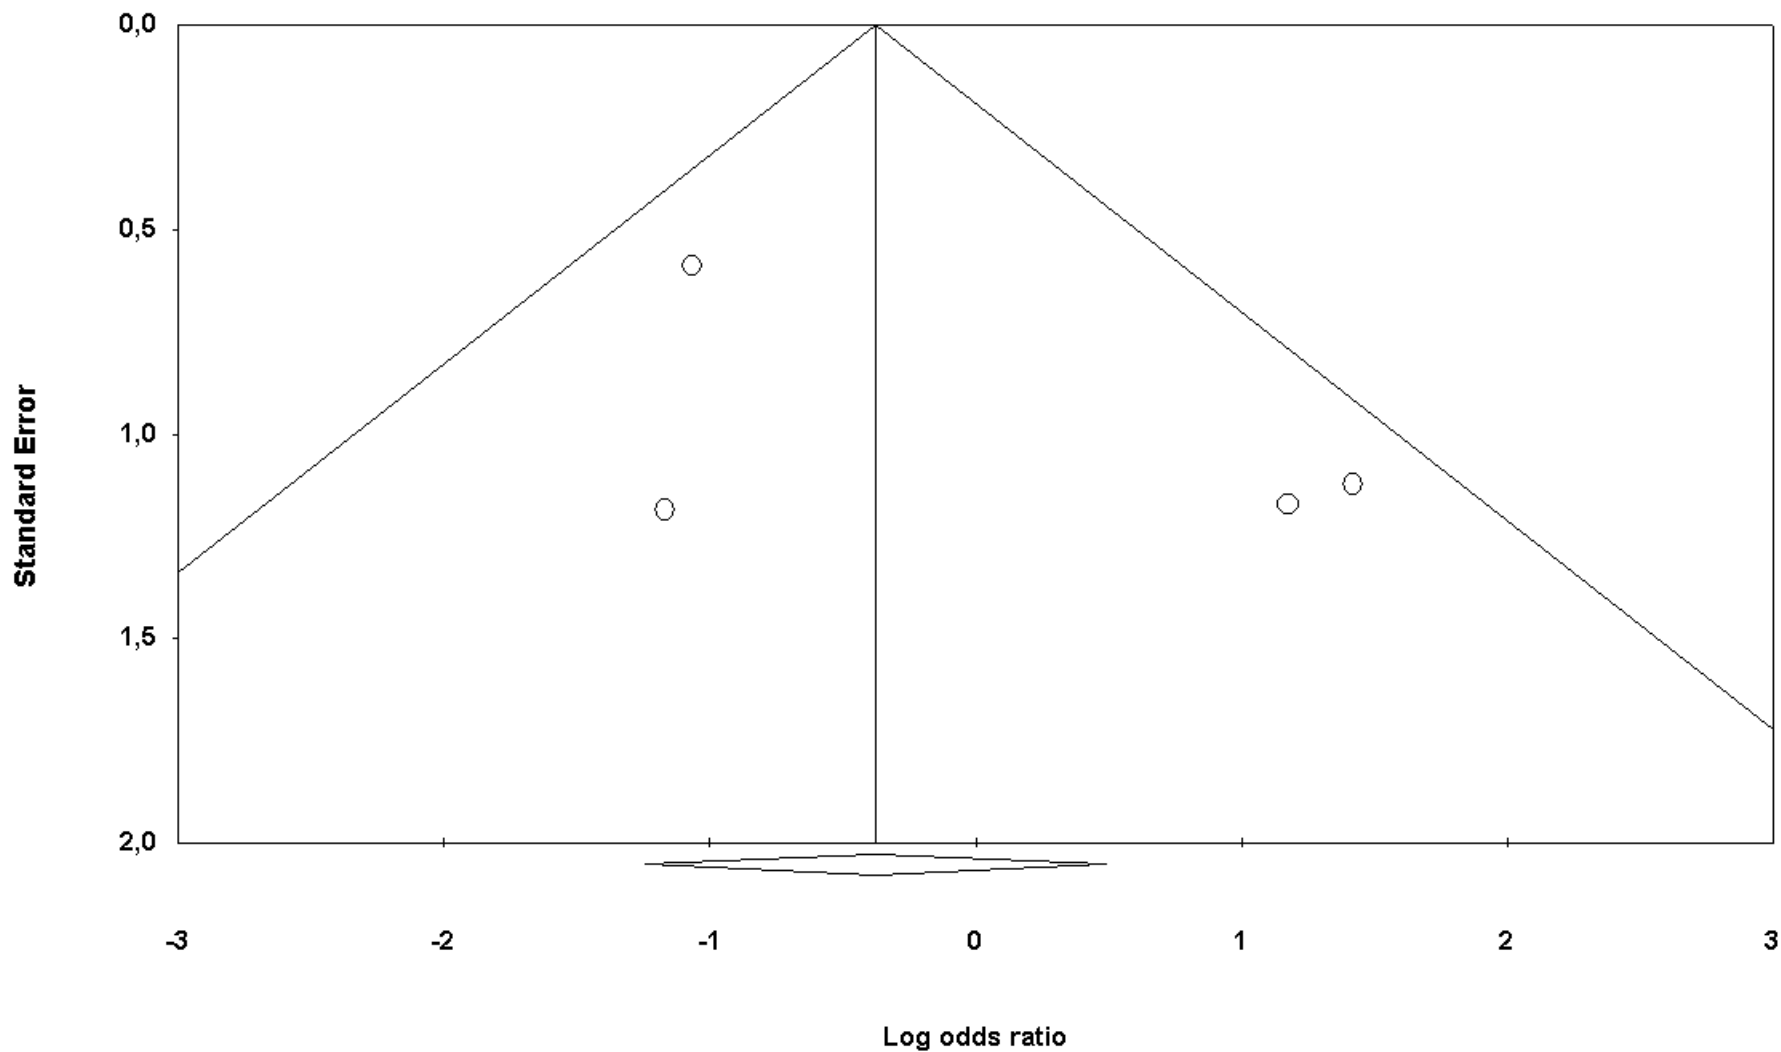

### Classic fail-safe N

|                                                               |          |
|---------------------------------------------------------------|----------|
| Z-value for observed studies                                  | -0,26475 |
| P-value for observed studies                                  | 0,79120  |
| Alpha                                                         | 0,05000  |
| Tails                                                         | 2,00000  |
| Z for alpha                                                   | 1,95996  |
| Number of observed studies                                    | 4,00000  |
| Number of missing studies that would bring p-value to > alpha | 0,00000  |

Edit

### Orwin's fail-safe N

|                                      |         |
|--------------------------------------|---------|
| Odds ratio in observed studies       | 0,68631 |
| Criterion for a 'trivial' odds ratio | 1,00000 |
| Mean odds ratio in missing studies   | 1,00000 |

Criterion must fall between other values

Edit

### **Begg and Mazumdar rank correlation**

**Kendall's S statistic (P-Q)** 0,00000

### **Kendall's tau without continuity correction**

Tau 0,00000  
z-value for tau 0,00000  
P-value (1-tailed) 0,50000  
P-value (2-tailed) 1,00000

### **Kendall's tau with continuity correction**

Tau 0,00000  
z-value for tau 0,00000  
P-value (1-tailed) 0,50000  
P-value (2-tailed) 1,00000

### **Egger's regression intercept**

|                            |          |
|----------------------------|----------|
| Intercept                  | 2,64232  |
| Standard error             | 1,99988  |
| 95% lower limit (2-tailed) | -5,96245 |
| 95% upper limit (2-tailed) | 11,24709 |
| t-value                    | 1,32124  |
| df                         | 2,00000  |
| P-value (1-tailed)         | 0,15866  |
| P-value (2-tailed)         | 0,31732  |



### Duval and Tweedie's trim and fill

|                        |                 | Fixed Effects  |             |             | Random Effects |             |             | Q Value  |
|------------------------|-----------------|----------------|-------------|-------------|----------------|-------------|-------------|----------|
|                        | Studies Trimmed | Point Estimate | Lower Limit | Upper Limit | Point Estimate | Lower Limit | Upper Limit |          |
| <b>Observed values</b> |                 | 0,68631        | 0,28851     | 1,63259     | 0,92570        | 0,23387     | 3,66408     | 6,14350  |
| <b>Adjusted values</b> | 1               | 0,49361        | 0,22039     | 1,10556     | 0,57582        | 0,14078     | 2,35529     | 10,28527 |

#### Look for missing studies where?

- Not specified
- To left of mean
- To right of mean

#### Look for missing studies using which model?

- Not specified
- Fixed effect model
- Random effects model

|                 |                                               |
|-----------------|-----------------------------------------------|
| <b>Articles</b> | <b>SLE C&amp;C and RCT<br/>exposed to HRT</b> |
| Outcomes        | Coronary Disease                              |
| Limits          | SLE and HRT ever<br>use                       |
| Effect measure  | OR                                            |

Were taking into account coronary artery disease and noncalcified coronary plaques in  
Ever use of HRT

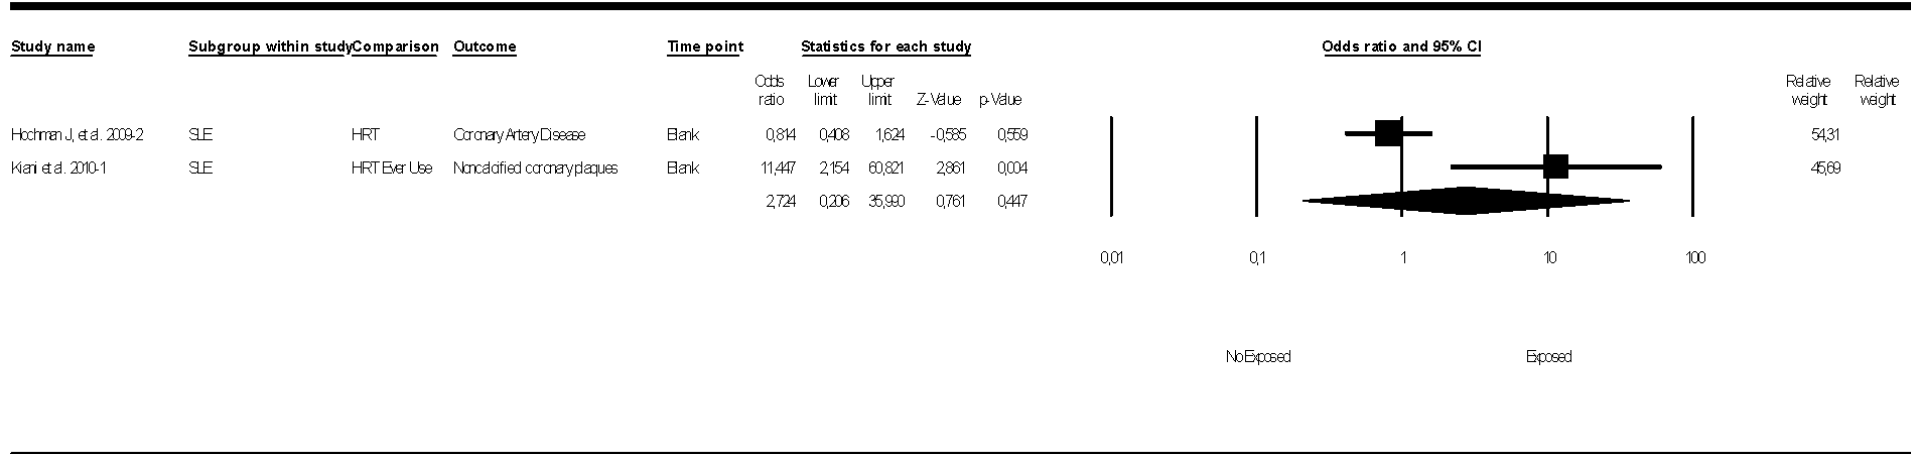



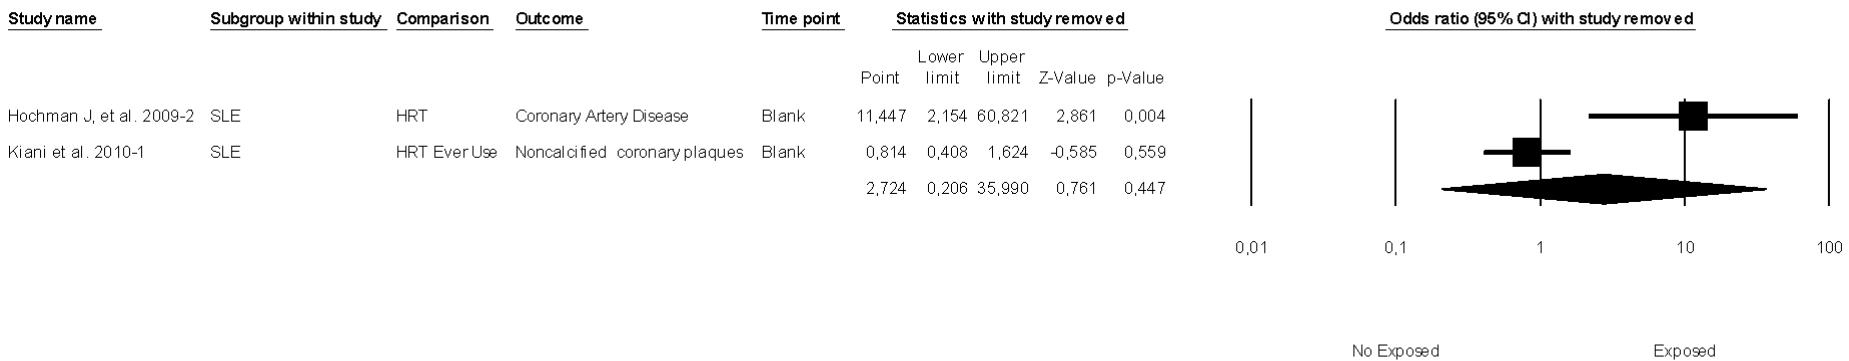

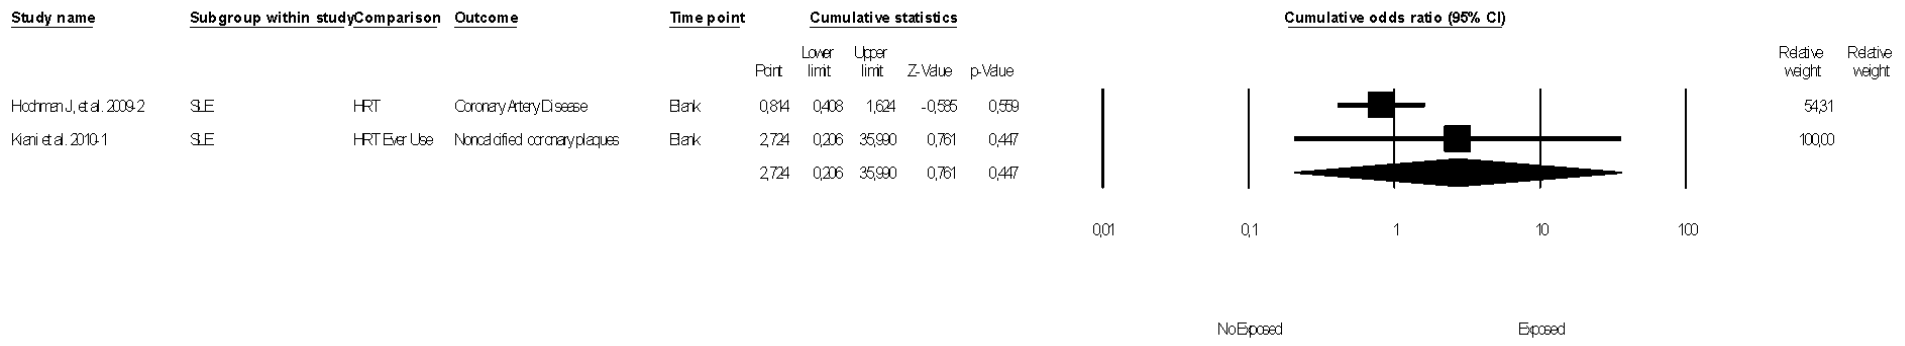

There are not enough data to realice Funnel Plot and the others estimates

|                 |                               |
|-----------------|-------------------------------|
| <b>Articles</b> | <b>SLE RCT exposed to HRT</b> |
| Outcomes        | SLEDAI Mean Change            |
| Limits          | 12 Months                     |
| Effect measure  | g Hedges                      |



| Study name                         | Subgroup within study | Comparison | Outcome                     | Time point | Statistics for each study |                |          |             |             |         |         |
|------------------------------------|-----------------------|------------|-----------------------------|------------|---------------------------|----------------|----------|-------------|-------------|---------|---------|
|                                    |                       |            |                             |            | Hedges's g                | Standard error | Variance | Lower limit | Upper limit | Z-Value | p-Value |
| Buyon JP, et al. 2005-14           | SLE                   | HRT        | Mean Change SLEDAI          | 12 Months  | 0,081                     | 0,117          | 0,014    | -0,148      | 0,309       | 0,692   | 0,489   |
| Mok CC, et al. 1998-5              | SLE                   | HRT        | Total SLEDAI flares/patient | 35 Months  | -2,527                    | 0,471          | 0,222    | -3,451      | -1,604      | -5,363  | 0,000   |
| Sanchez-Guerrero J, et al. 2007-12 | SLE                   | HRT        | Max Change SLEDAI           | 24 Months  | 0,000                     | 0,193          | 0,037    | -0,378      | 0,378       | 0,000   | 1,000   |
|                                    |                       |            |                             |            | -0,663                    | 0,469          | 0,220    | -1,583      | 0,257       | -1,412  | 0,158   |

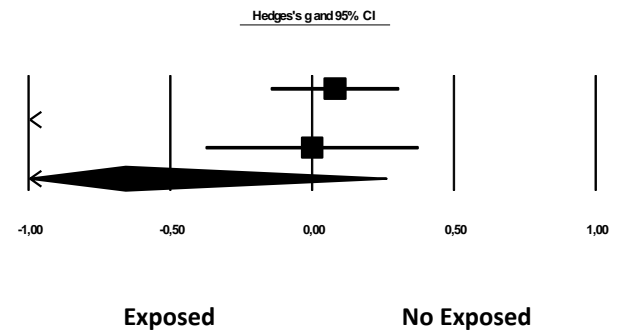





| Study name                        | Subgroup within study | Comparison | Outcome                     | Time point | Cumulative statistics |                |          |             |             |         |         |
|-----------------------------------|-----------------------|------------|-----------------------------|------------|-----------------------|----------------|----------|-------------|-------------|---------|---------|
|                                   |                       |            |                             |            | Point                 | Standard error | Variance | Lower limit | Upper limit | Z-Value | p-Value |
| Sanchez-Guenero J, et al. 2007-12 | SLE                   | Blank      | Max Change SLEDAI           | 24 Months  | 0,000                 | 0,193          | 0,037    | -0,378      | 0,378       | 0,000   | 1,000   |
| Buyon JP, et al. 2005-14          | SLE                   | Blank      | Mean Change SLEDAI          | 12 Months  | 0,059                 | 0,100          | 0,010    | -0,136      | 0,255       | 0,592   | 0,554   |
| Mok CC, et al. 1998-5             | SLE                   | Blank      | Total SLEDAI flares/patient | 35 Months  | -0,663                | 0,469          | 0,220    | -1,583      | 0,257       | -1,412  | 0,158   |
|                                   |                       |            |                             |            | -0,663                | 0,469          | 0,220    | -1,583      | 0,257       | -1,412  | 0,158   |

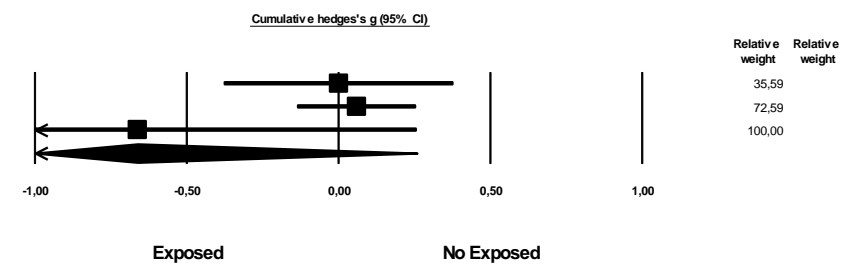

Funnel Plot of Standard Error by Hedges's g

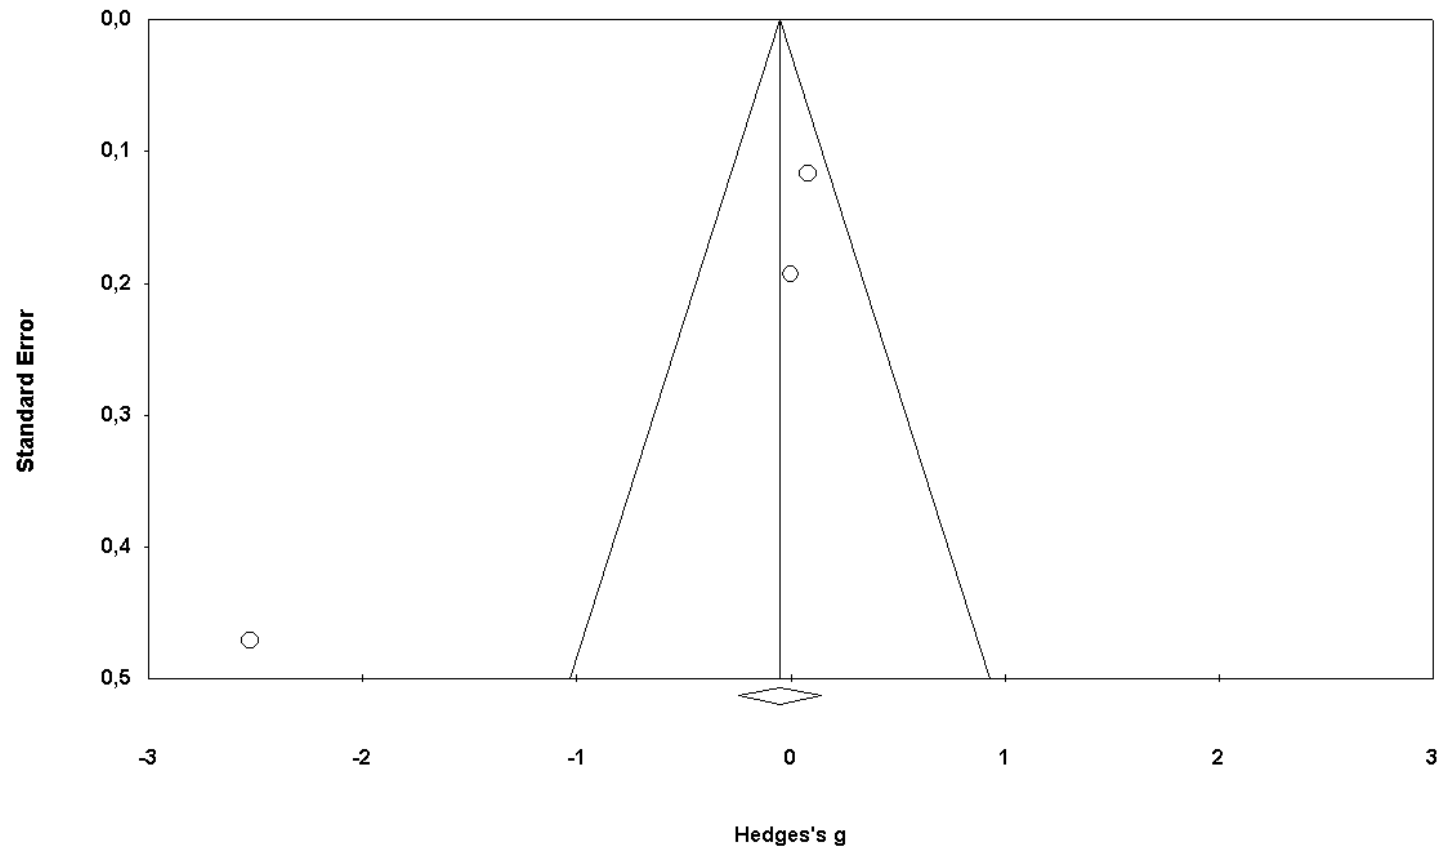

### Classic fail-safe N

|                                                               |          |
|---------------------------------------------------------------|----------|
| Z-value for observed studies                                  | -2,69714 |
| P-value for observed studies                                  | 0,00699  |
| Alpha                                                         | 0,05000  |
| Tails                                                         | 2,00000  |
| Z for alpha                                                   | 1,95996  |
| Number of observed studies                                    | 3,00000  |
| Number of missing studies that would bring p-value to > alpha | 3,00000  |

Edit

### Orwin's fail-safe N

|                                      |          |
|--------------------------------------|----------|
| Hedges's g in observed studies       | -0,05186 |
| Criterion for a 'trivial' hedges's g | 0,00000  |
| Mean hedges's g in missing studies   | 0,00000  |

Criterion must fall between other values

### **Begg and Mazumdar rank correlation**

**Kendall's S statistic (P-Q)** -3,00000

### **Kendall's tau without continuity correction**

Tau -1,00000  
z-value for tau 1,56670  
P-value (1-tailed) 0,05859  
P-value (2-tailed) 0,11719

### **Kendall's tau with continuity correction**

Tau -0,66667  
z-value for tau 1,04447  
P-value (1-tailed) 0,14813  
P-value (2-tailed) 0,29627

### **Egger's regression intercept**

|                            |           |
|----------------------------|-----------|
| Intercept                  | -6,45060  |
| Standard error             | 2,63445   |
| 95% lower limit (2-tailed) | -39,92452 |
| 95% upper limit (2-tailed) | 27,02331  |
| t-value                    | 2,44855   |
| df                         | 1,00000   |
| P-value (1-tailed)         | 0,12342   |
| P-value (2-tailed)         | 0,24684   |



### Duval and Tweedie's trim and fill

|                        |                 | Fixed Effects  |             |             | Random Effects |             |             | Q Value  |
|------------------------|-----------------|----------------|-------------|-------------|----------------|-------------|-------------|----------|
|                        | Studies Trimmed | Point Estimate | Lower Limit | Upper Limit | Point Estimate | Lower Limit | Upper Limit |          |
| <b>Observed values</b> |                 | -0,05186       | -0,24310    | 0,13939     | -0,66285       | -1,58301    | 0,25731     | 28,95955 |
| <b>Adjusted values</b> | 0               | -0,05186       | -0,24310    | 0,13939     | -0,66285       | -1,58301    | 0,25731     | 28,95955 |

#### Look for missing studies where?

- Not specified
- To left of mean
- To right of mean

#### Look for missing studies using which model?

- Not specified
- Fixed effect model
- Random effects model

|                 |                               |
|-----------------|-------------------------------|
| <b>Articles</b> | <b>SLE RCT exposed to HRT</b> |
| Outcomes        | SLEDAI Mean Change            |
| Limits          | 12 Months                     |
| Effect measure  | Std Difference means          |

Monitoring that could be analyzable homogeneously

| Studyname                         | Subgroup within study | Comparison | Outcome            | Time point | Statistics for each study |                |          |             |             |         |         |  |
|-----------------------------------|-----------------------|------------|--------------------|------------|---------------------------|----------------|----------|-------------|-------------|---------|---------|--|
|                                   |                       |            |                    |            | Difference in means       | Standard error | Variance | Lower limit | Upper limit | Z-Value | p-Value |  |
| Buyon JP, et al. 2005-14          | SLE                   | HRT        | Mean Change SLEDAI | 12 Months  | 0,230                     | 0,332          | 0,111    | -0,422      | 0,882       | 0,682   | 0,489   |  |
| Sanchez-Guerrero J, et al. 2007-7 | SLE                   | HRT        | Mean Change SLEDAI | 12 Months  | -3,400                    | 4,551          | 20,708   | -12,319     | 5,519       | -0,747  | 0,455   |  |
|                                   |                       |            |                    |            | 0,211                     | 0,332          | 0,110    | -0,439      | 0,861       | 0,636   | 0,525   |  |

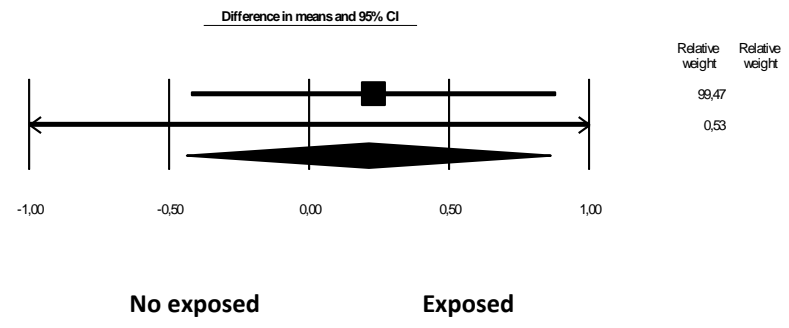



| Study name                        | Subgroup within study | Comparison | Outcome            | Time point | Statistics with study removed |                |          |             |             |         |         |
|-----------------------------------|-----------------------|------------|--------------------|------------|-------------------------------|----------------|----------|-------------|-------------|---------|---------|
|                                   |                       |            |                    |            | Point                         | Standard error | Variance | Lower limit | Upper limit | Z-Value | p-Value |
| Byzn JP, et al. 2006-14           | SLE                   | HRT        | Mean Change SLEDAI | 12Months   | -3,400                        | 4,551          | 20,708   | -12,319     | 5,519       | -0,747  | 0,455   |
| Sanchez-Guerrero J, et al. 2007-7 | SLE                   | HRT        | Mean Change SLEDAI | 12Months   | 0,230                         | 0,332          | 0,111    | -0,422      | 0,882       | 0,692   | 0,489   |
|                                   |                       |            |                    |            | 0,211                         | 0,332          | 0,110    | -0,439      | 0,861       | 0,635   | 0,525   |

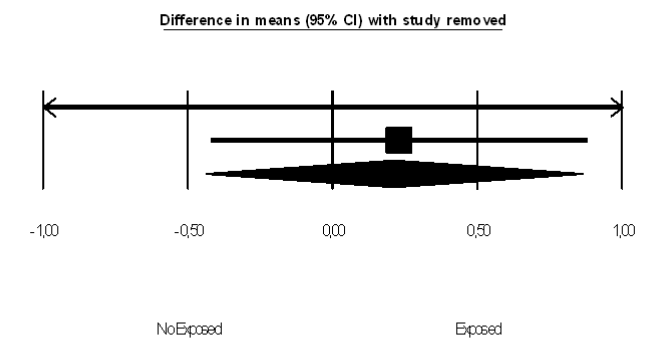

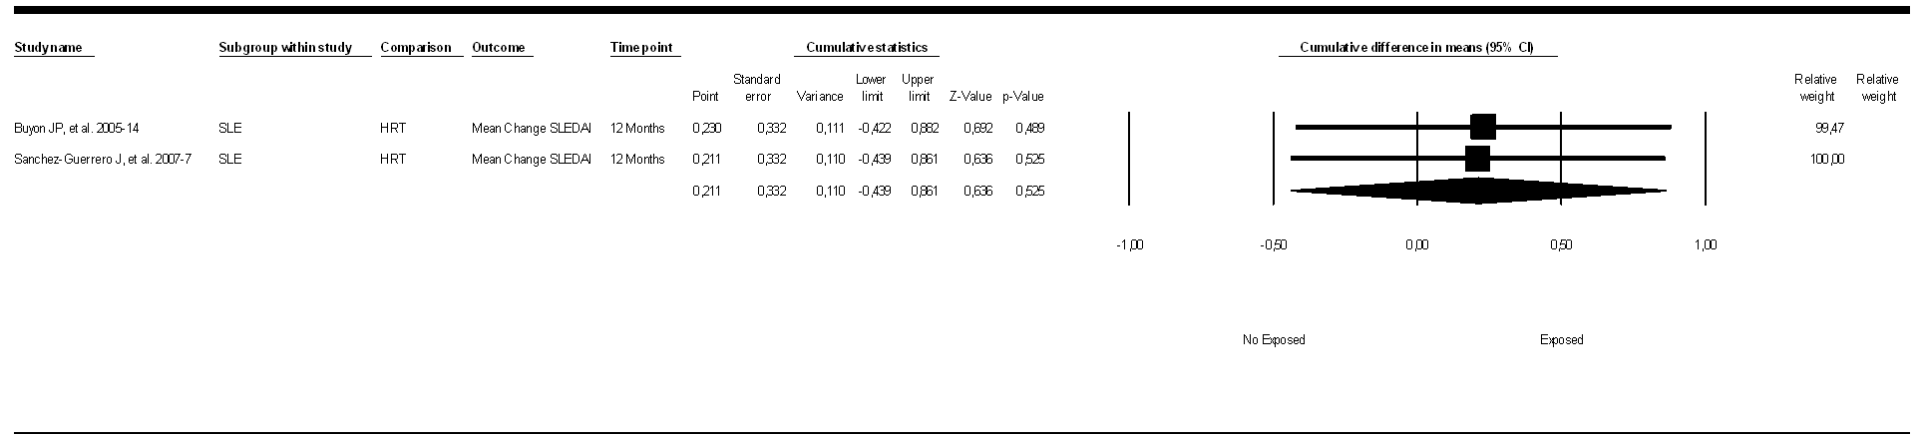

|                       |                                           |
|-----------------------|-------------------------------------------|
| <b>Articles</b>       | <b>SLE RCT exposed to HRT</b>             |
| <b>Outcomes</b>       | <b>SLEDAI Mean Change</b>                 |
| <b>Limits</b>         | <b>Max follow time (12 and 24 months)</b> |
| <b>Effect measure</b> | <b>Std Difference means</b>               |

The following analysis is the same as above but changing Sanchez-Guerrero by n11

| Studyname                          | Subgroup within study | Comparison | Outcome            | Time point | Statistics for each study |                |          |             |             |         |         |  |
|------------------------------------|-----------------------|------------|--------------------|------------|---------------------------|----------------|----------|-------------|-------------|---------|---------|--|
|                                    |                       |            |                    |            | Difference in means       | Standard error | Variance | Lower limit | Upper limit | Z-Value | p-Value |  |
| Buyon JP, et al. 2005-14           | SLE                   | HRT        | Mean Change SLEDAI | 12 Months  | 0,230                     | 0,332          | 0,111    | -0,422      | 0,882       | 0,692   | 0,489   |  |
| Sanchez-Guerrero J, et al. 2007-11 | SLE                   | HRT        | Mean Change SLEDAI | 24 Months  | -3,900                    | 8,408          | 70,689   | -20,379     | 12,579      | -0,464  | 0,643   |  |
|                                    |                       |            |                    |            | 0,224                     | 0,332          | 0,110    | -0,427      | 0,875       | 0,673   | 0,501   |  |

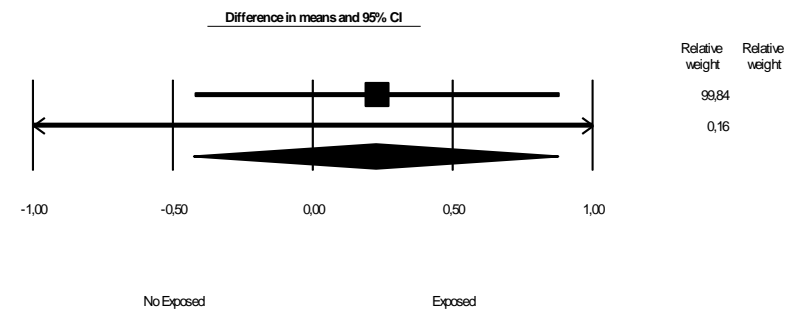







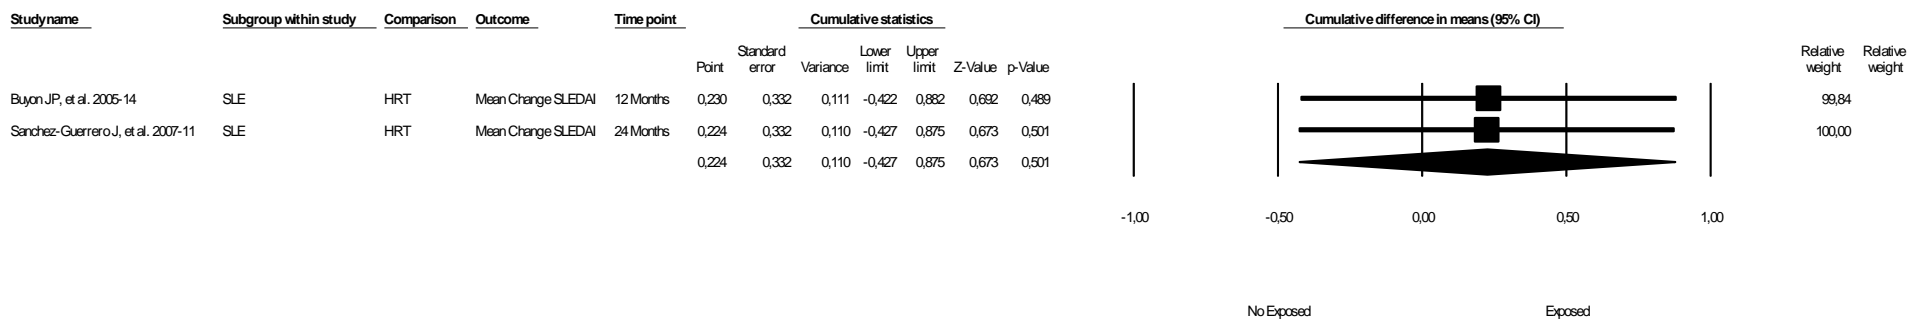

There are not enough data to realize Funnel Plot and the others estimates

|                 |                                               |
|-----------------|-----------------------------------------------|
| <b>Articles</b> | <b>SLE C&amp;C and RCT<br/>exposed to HRT</b> |
| Outcomes        | Death                                         |
| Limits          | SLE                                           |
| Effect measure  | OR                                            |

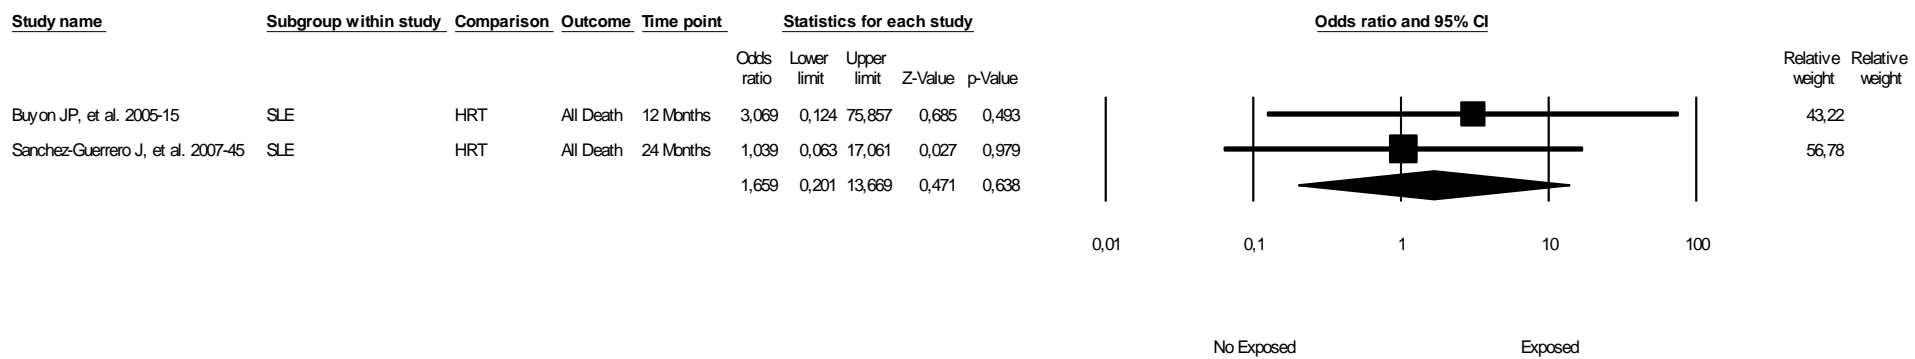



| Study name                         | Subgroup within study | Comparison | Outcome   | Time point | Statistics with study removed |             |             |         |         |
|------------------------------------|-----------------------|------------|-----------|------------|-------------------------------|-------------|-------------|---------|---------|
|                                    |                       |            |           |            | Point                         | Lower limit | Upper limit | Z-Value | p-Value |
| Buyon JP, et al. 2005-15           | SLE                   | HRT        | All Death | 12 Months  | 1,039                         | 0,063       | 17,061      | 0,027   | 0,979   |
| Sanchez-Guerrero J, et al. 2007-45 | SLE                   | HRT        | All Death | 24 Months  | 3,069                         | 0,124       | 75,857      | 0,685   | 0,493   |
|                                    |                       |            |           |            | 1,659                         | 0,201       | 13,669      | 0,471   | 0,638   |

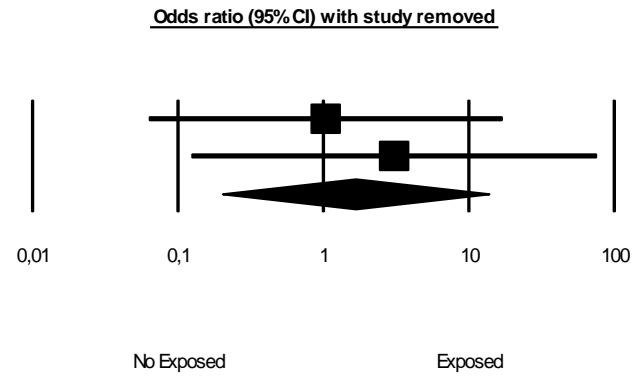



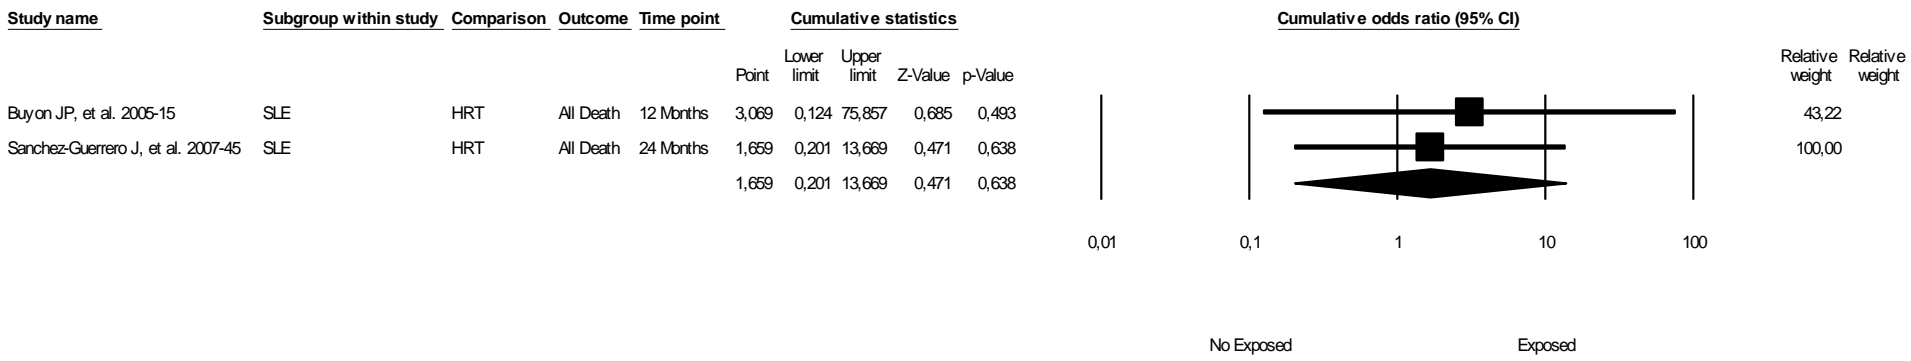

There are not enough data to realice Funnel Plot and the others estimates
