# Supplementary material for: Safety of Hormonal Replacement Therapy and Oral Contraceptives in Systemic Lupus Erythematosus: A Systematic Review and Meta-Analysis
Source: PubMed Central journal article supplement (PMC4138076; doi:10.1371/journal.pone.0104303), 2014-08-19
Supplement: pone.0104303.s005.pdf [file pone.0104303.s005.pdf]

| Order                |                      |
|----------------------|----------------------|
| Analysis description | Title                |
| Forest Plot          | Random Model         |
| Calculations         | Heterogeneity Table  |
| One Study Removed    | Sensibility Analysis |
| Cumulative Analysis  | Cumulative Analysis  |
| Funnel Plot          | Funnel Plot of SE    |
| Calculations         | Classic              |
|                      | Begg                 |
|                      | Egger                |
|                      | Duval                |

|                 |                                                            |
|-----------------|------------------------------------------------------------|
| <b>Articles</b> | <b>C&amp;C SLE vs<br/>Healthy and<br/>Cohorte using OC</b> |
| Outcomes        | SLE                                                        |
| Limits          | Current use                                                |
| Effect measure  | OR                                                         |

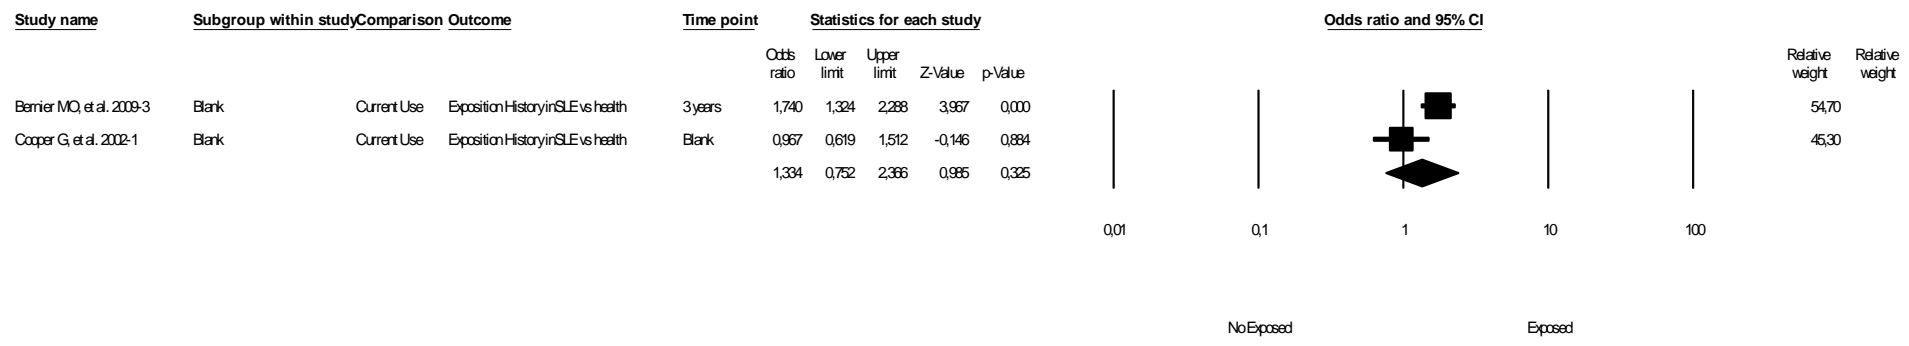



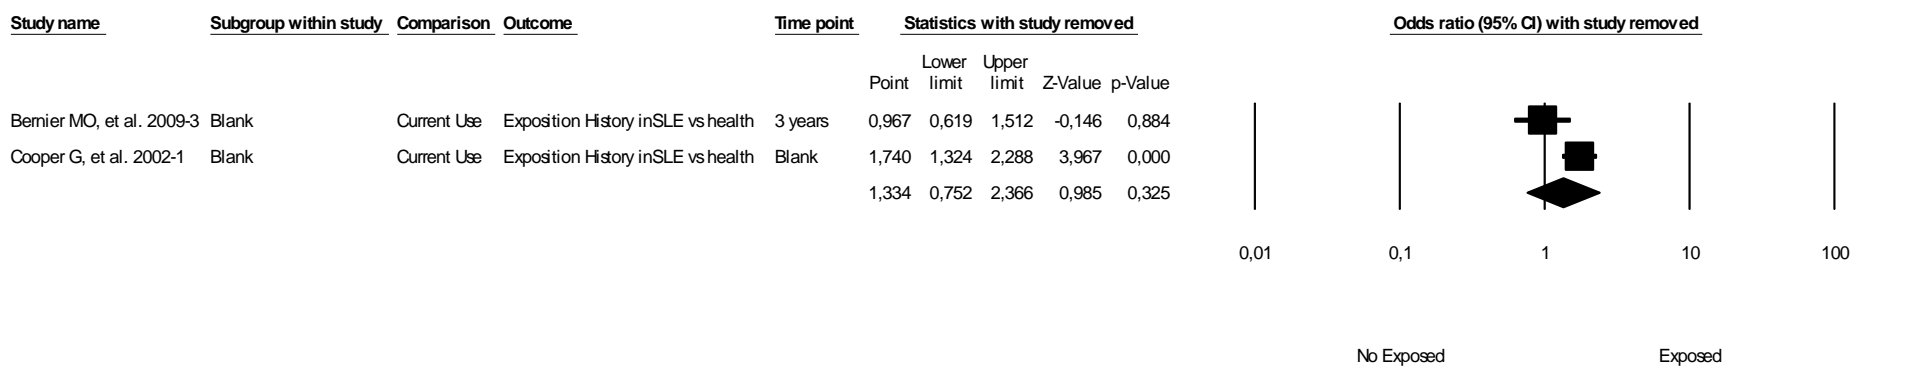

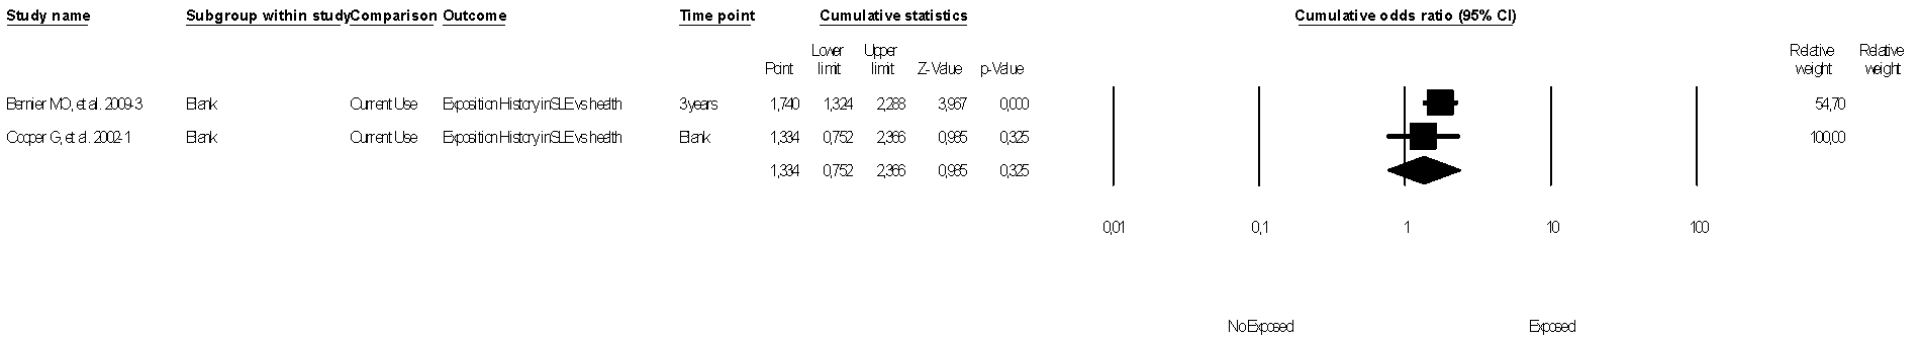

There are not enough data to realice Funnel Plot and the others estimates

|                       |                                             |
|-----------------------|---------------------------------------------|
| <b>Articles</b>       | <b>SLE C&amp;C and Cohort exposed to OC</b> |
| <b>Outcomes</b>       | <b>SLE</b>                                  |
| <b>Limits</b>         | <b>Ever Use and Ever Use according age</b>  |
| <b>Effect measure</b> | <b>OR</b>                                   |

There were taking into account data from all studies that show classification of “ever use” without count time of exposition



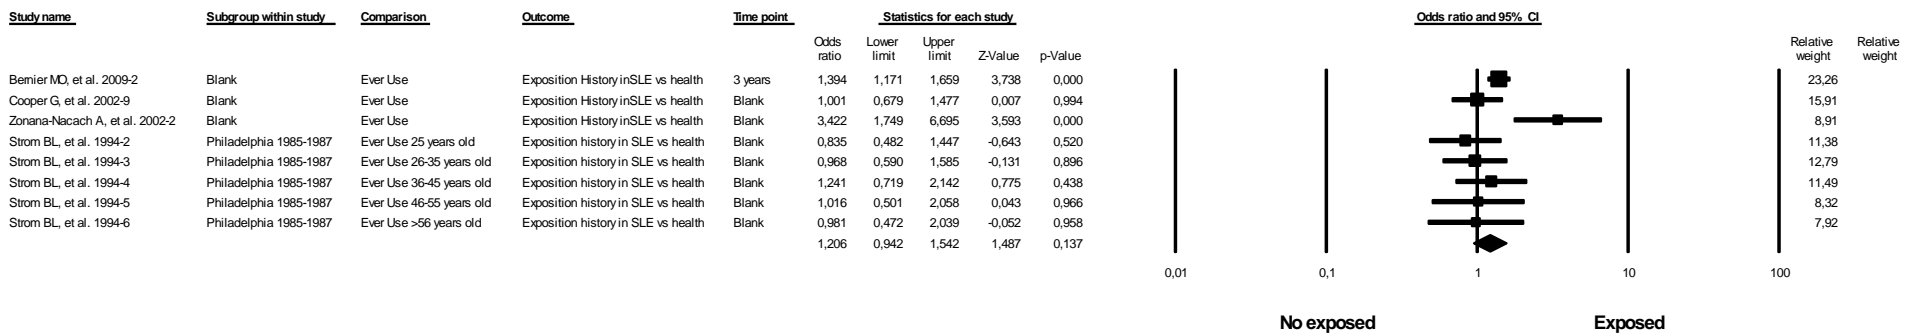



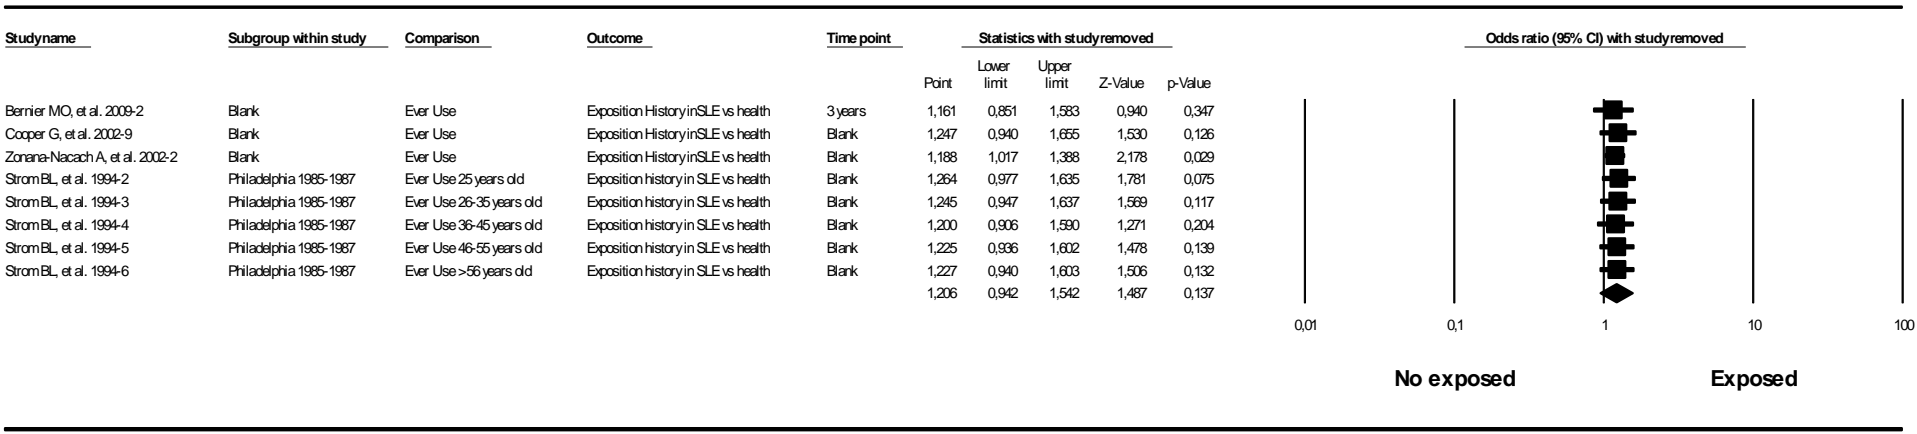

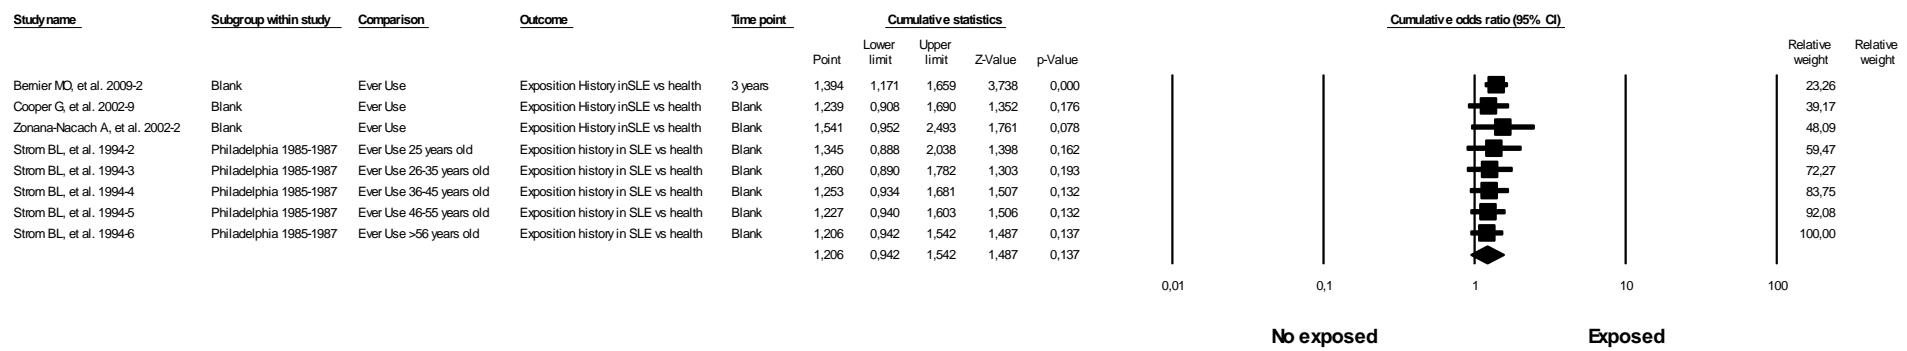

**Funnel Plot of Standard Error by Log odds ratio**

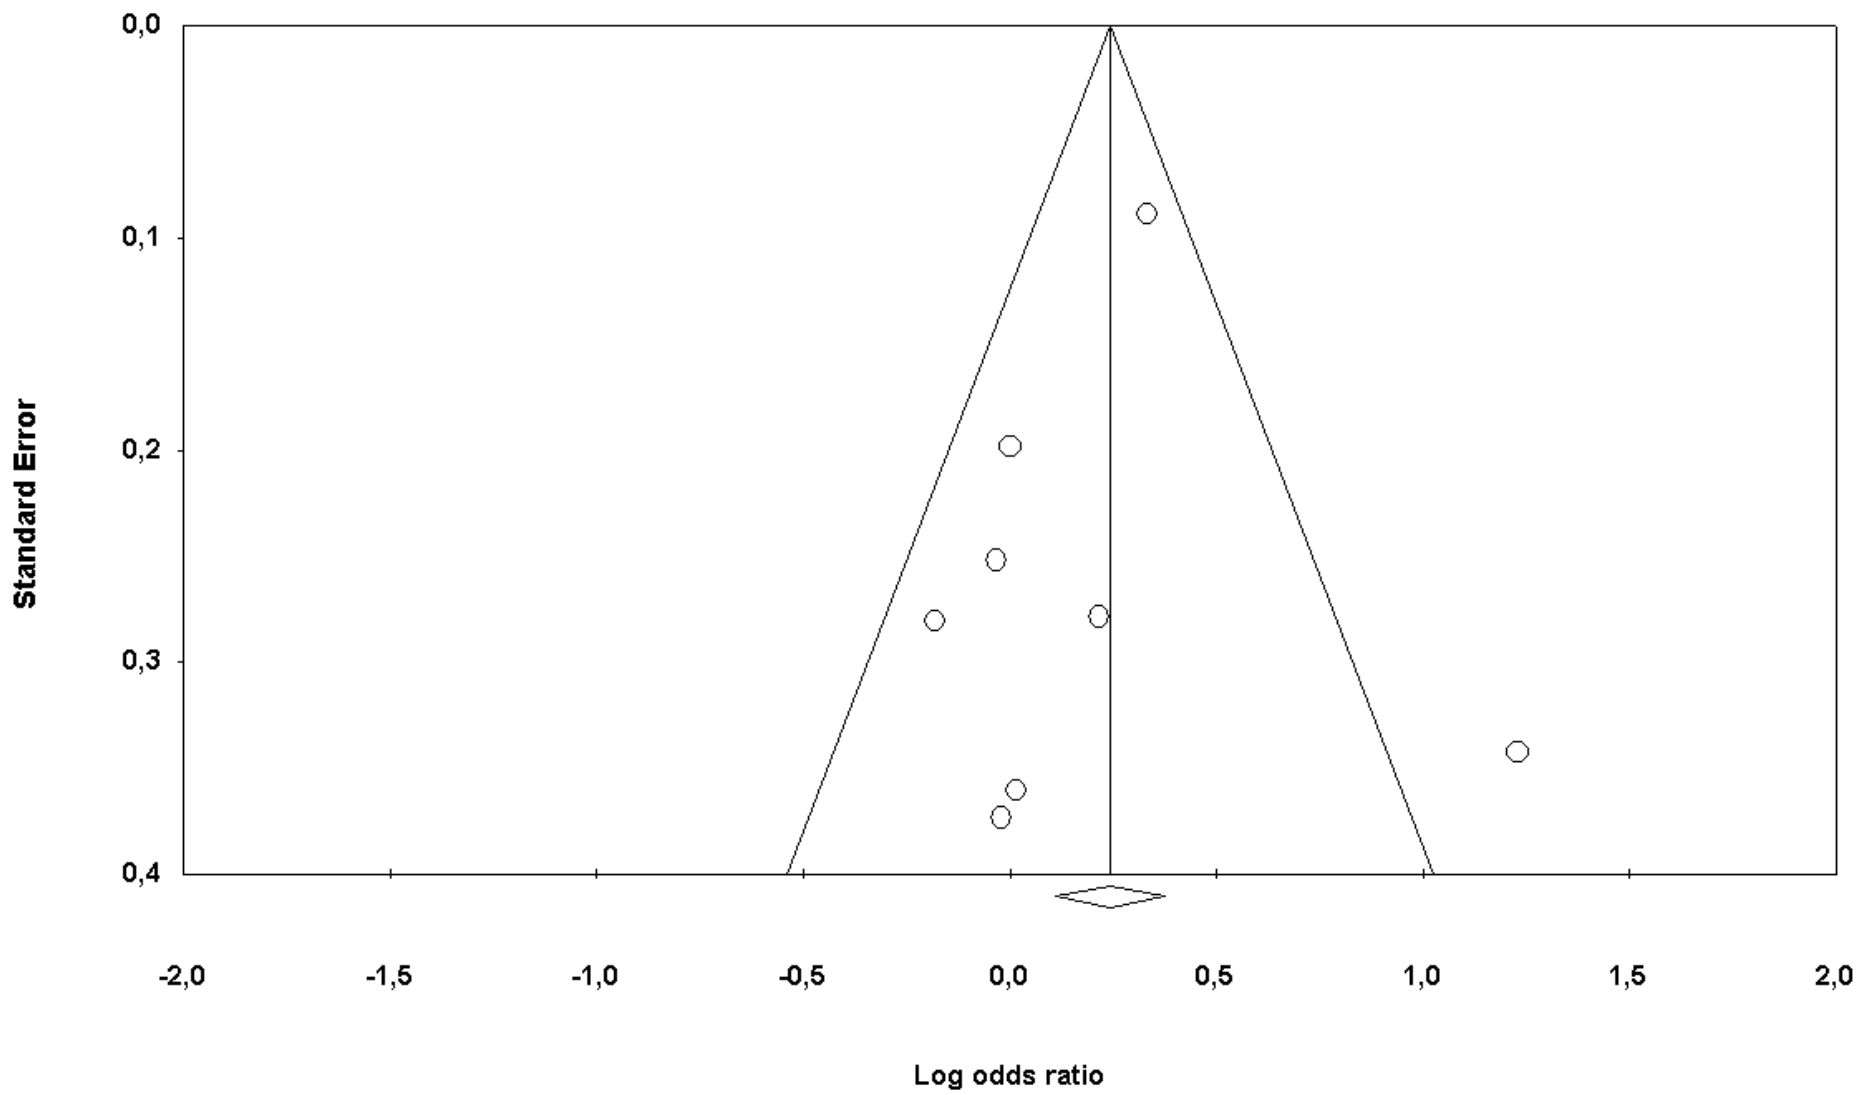

### Classic fail-safe N

|                                                                  |         |
|------------------------------------------------------------------|---------|
| Z-value for observed studies                                     | 2,59159 |
| P-value for observed studies                                     | 0,00955 |
| Alpha                                                            | 0,05000 |
| Tails                                                            | 2,00000 |
| Z for alpha                                                      | 1,95996 |
| Number of observed studies                                       | 8,00000 |
| Number of missing studies that would bring p-value to $> \alpha$ | 6,00000 |

Edit

### Orwin's fail-safe N

|                                      |         |
|--------------------------------------|---------|
| Odds ratio in observed studies       | 1,27423 |
| Criterion for a 'trivial' odds ratio | 1,00000 |
| Mean odds ratio in missing studies   | 1,00000 |

Criterion must fall between other values

Edit

## **Begg and Mazumdar rank correlation**

**Kendall's S statistic (P-Q)** 0,00000

### **Kendall's tau without continuity correction**

Tau 0,00000  
z-value for tau 0,00000  
P-value (1-tailed) 0,50000  
P-value (2-tailed) 1,00000

### **Kendall's tau with continuity correction**

Tau 0,00000  
z-value for tau 0,00000  
P-value (1-tailed) 0,50000  
P-value (2-tailed) 1,00000

### **Egger's regression intercept**

|                            |          |
|----------------------------|----------|
| Intercept                  | -0,64309 |
| Standard error             | 1,06889  |
| 95% lower limit (2-tailed) | -3,25858 |
| 95% upper limit (2-tailed) | 1,97240  |
| t-value                    | 0,60164  |
| df                         | 6,00000  |
| P-value (1-tailed)         | 0,28472  |
| P-value (2-tailed)         | 0,56943  |



### Duval and Tweedie's trim and fill

|                        |                 | Fixed Effects  |             |             | Random Effects |             |             | Q Value  |
|------------------------|-----------------|----------------|-------------|-------------|----------------|-------------|-------------|----------|
|                        | Studies Trimmed | Point Estimate | Lower Limit | Upper Limit | Point Estimate | Lower Limit | Upper Limit |          |
| <b>Observed values</b> |                 | 1,27423        | 1,11540     | 1,45568     | 1,20558        | 0,94229     | 1,54244     | 15,18941 |
| <b>Adjusted values</b> | 0               | 1,27423        | 1,11540     | 1,45568     | 1,20558        | 0,94229     | 1,54244     | 15,18941 |

#### Look for missing studies where?

- Not specified
- To left of mean
- To right of mean

#### Look for missing studies using which model?

- Not specified
- Fixed effect model
- Random effects model

|                 |                                             |
|-----------------|---------------------------------------------|
| <b>Articles</b> | <b>SLE C&amp;C and Cohort exposed to OC</b> |
| Outcomes        | SLE                                         |
| Limits          | Ever Use and Ever Use according age         |
| Effect measure  | OR                                          |

Here we take every Strom's data according to age of exposed

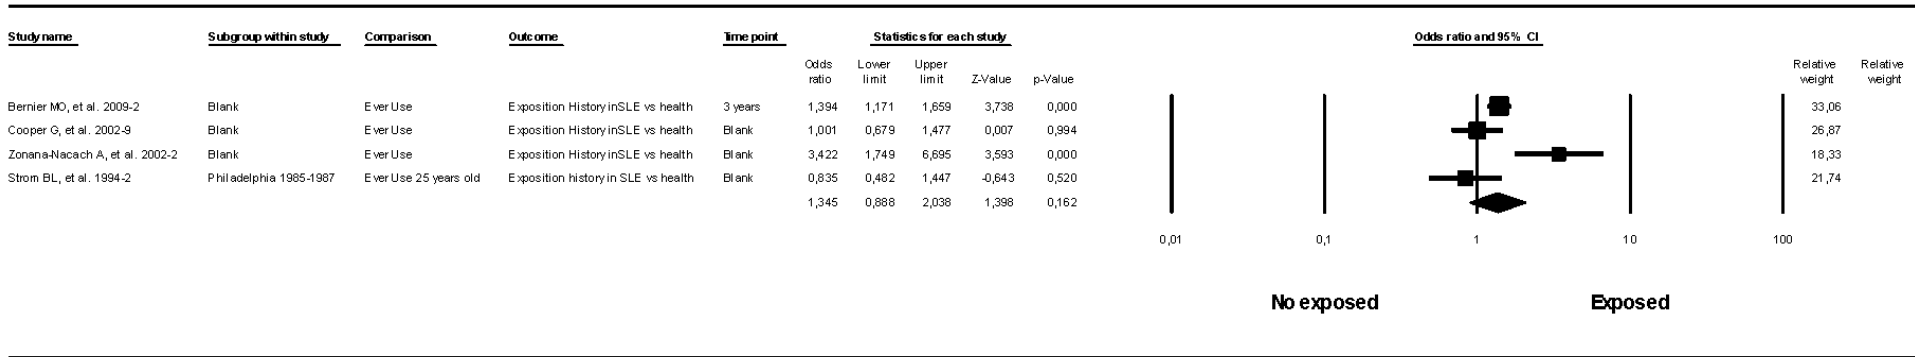



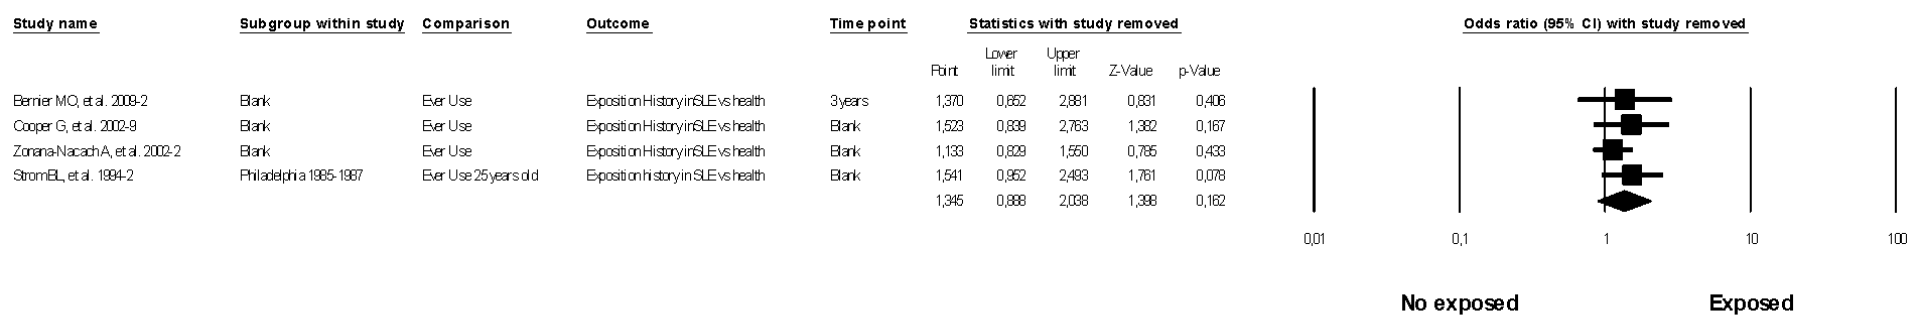

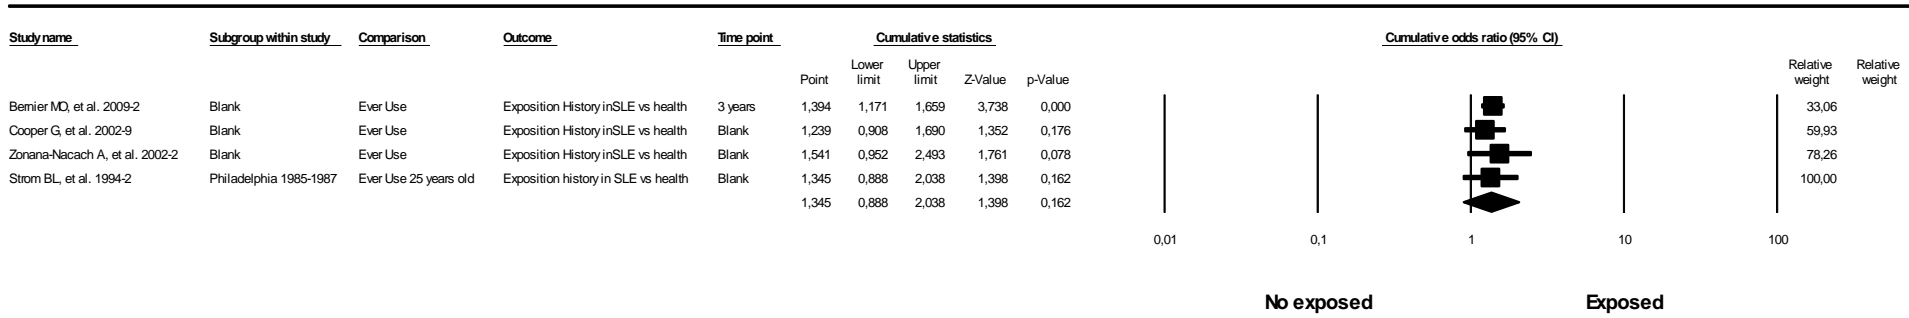

Funnel Plot of Standard Error by Log odds ratio

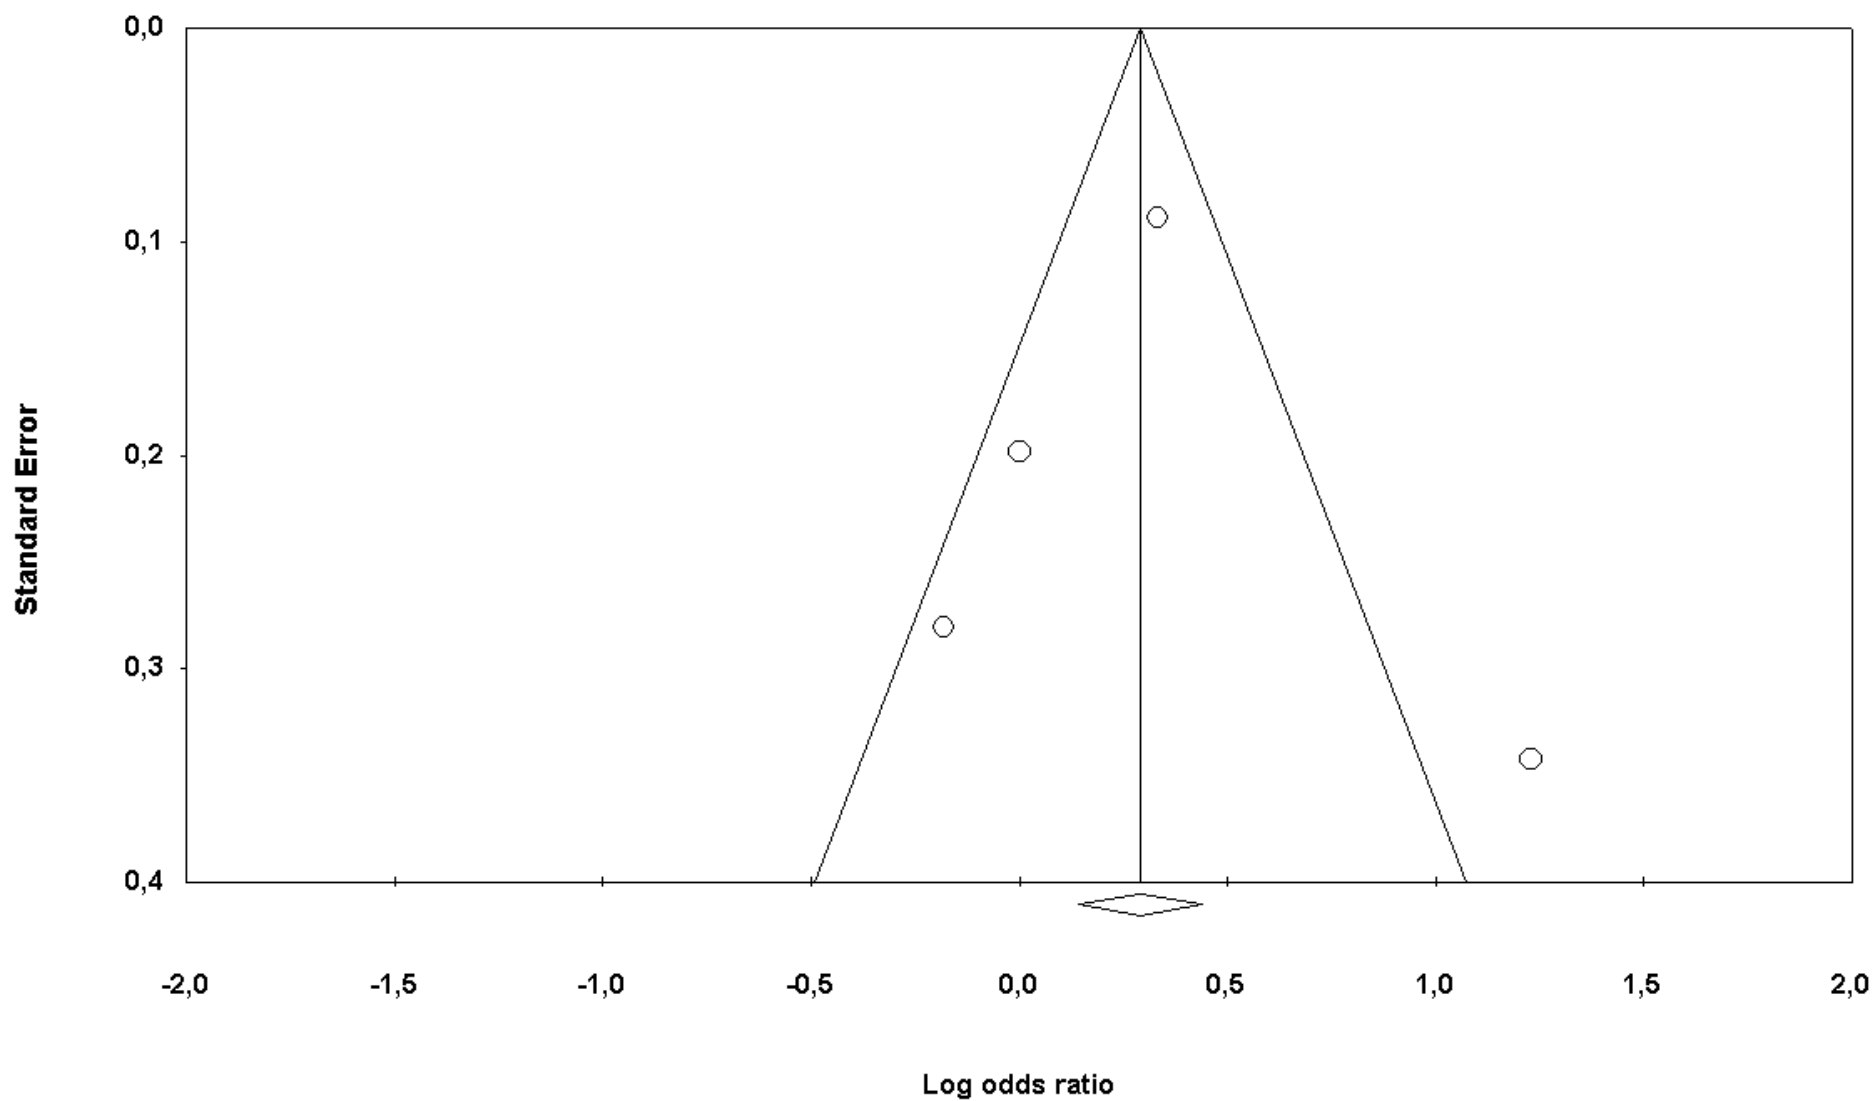

### Classic fail-safe N

|                                                               |         |
|---------------------------------------------------------------|---------|
| Z-value for observed studies                                  | 3,34751 |
| P-value for observed studies                                  | 0,00082 |
| Alpha                                                         | 0,05000 |
| Tails                                                         | 2,00000 |
| Z for alpha                                                   | 1,95996 |
| Number of observed studies                                    | 4,00000 |
| Number of missing studies that would bring p-value to > alpha | 8,00000 |

Edit

### Orwin's fail-safe N

|                                      |         |
|--------------------------------------|---------|
| Odds ratio in observed studies       | 1,33679 |
| Criterion for a 'trivial' odds ratio | 1,00000 |
| Mean odds ratio in missing studies   | 1,00000 |

Criterion must fall between other values



### **Begg and Mazumdar rank correlation**

**Kendall's S statistic (P-Q)** 0,00000

### **Kendall's tau without continuity correction**

Tau 0,00000  
z-value for tau 0,00000  
P-value (1-tailed) 0,50000  
P-value (2-tailed) 1,00000

### **Kendall's tau with continuity correction**

Tau 0,00000  
z-value for tau 0,00000  
P-value (1-tailed) 0,50000  
P-value (2-tailed) 1,00000

### **Egger's regression intercept**

|                            |           |
|----------------------------|-----------|
| Intercept                  | 0,08243   |
| Standard error             | 2,51336   |
| 95% lower limit (2-tailed) | -10,73171 |
| 95% upper limit (2-tailed) | 10,89656  |
| t-value                    | 0,03280   |
| df                         | 2,00000   |
| P-value (1-tailed)         | 0,48841   |
| P-value (2-tailed)         | 0,97682   |

## Duval and Tweedie's trim and fill

|                        |                 | Fixed Effects  |             |             | Random Effects |             |             | Q Value  |
|------------------------|-----------------|----------------|-------------|-------------|----------------|-------------|-------------|----------|
|                        | Studies Trimmed | Point Estimate | Lower Limit | Upper Limit | Point Estimate | Lower Limit | Upper Limit |          |
| <b>Observed values</b> |                 | 1,33679        | 1,15184     | 1,55145     | 1,34517        | 0,88768     | 2,03845     | 12,69982 |
| <b>Adjusted values</b> | 0               | 1,33679        | 1,15184     | 1,55145     | 1,34517        | 0,88768     | 2,03845     | 12,69982 |

### Look for missing studies where?

- Not specified
- To left of mean
- To right of mean

### Look for missing studies using which model?

- Not specified
- Fixed effect model
- Random effects model

|                       |                                             |
|-----------------------|---------------------------------------------|
| <b>Articles</b>       | <b>SLE C&amp;C and Cohort exposed to OC</b> |
| <b>Outcomes</b>       | <b>SLE</b>                                  |
| <b>Limits</b>         | <b>Ever Use and Ever Use according age</b>  |
| <b>Effect measure</b> | <b>OR</b>                                   |

Here we take every Strom's data according to age of exposed

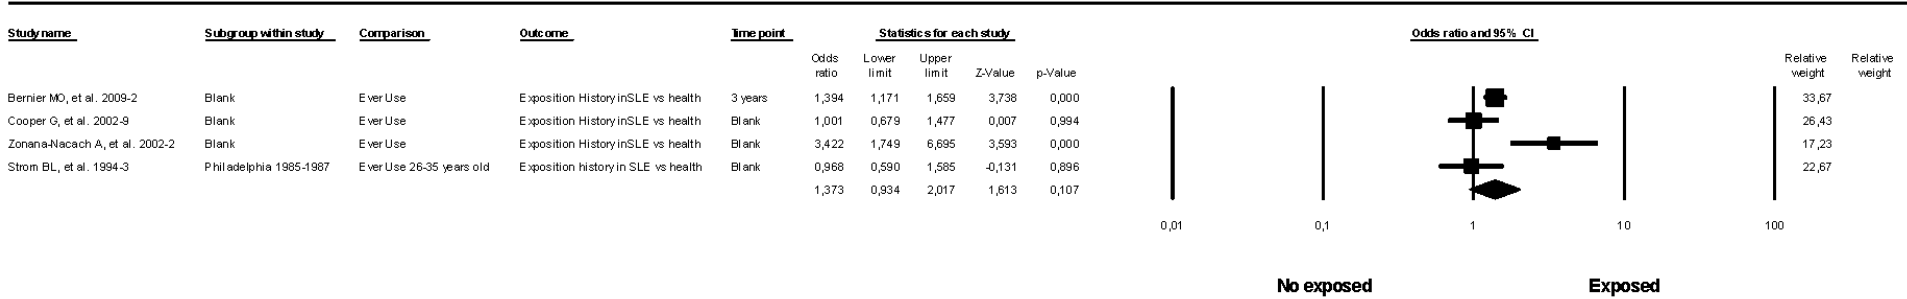



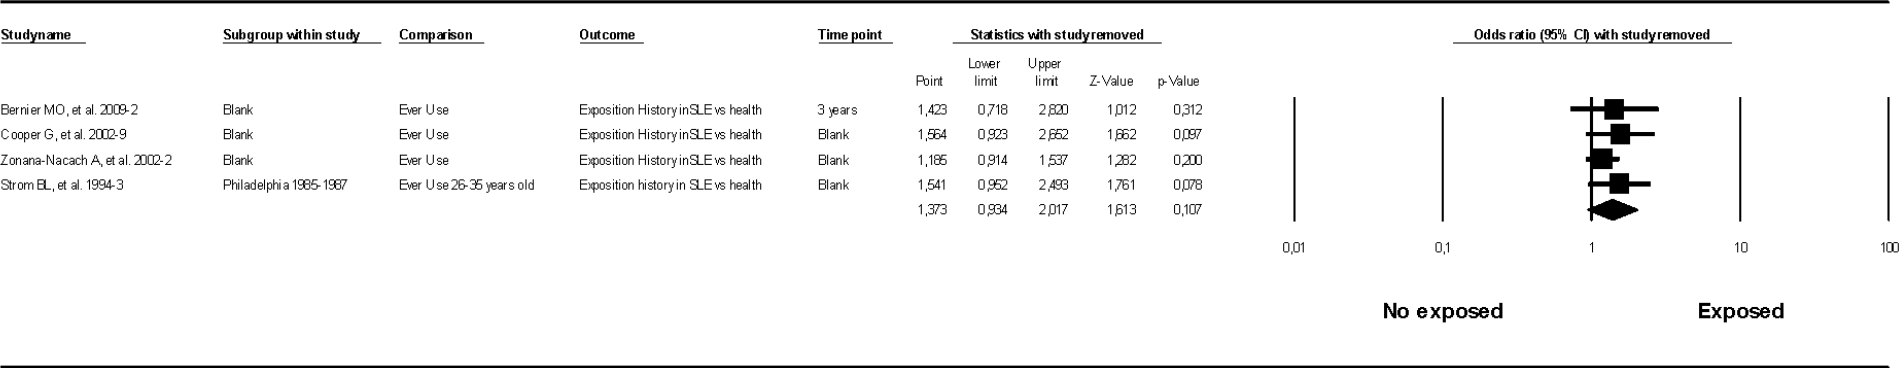

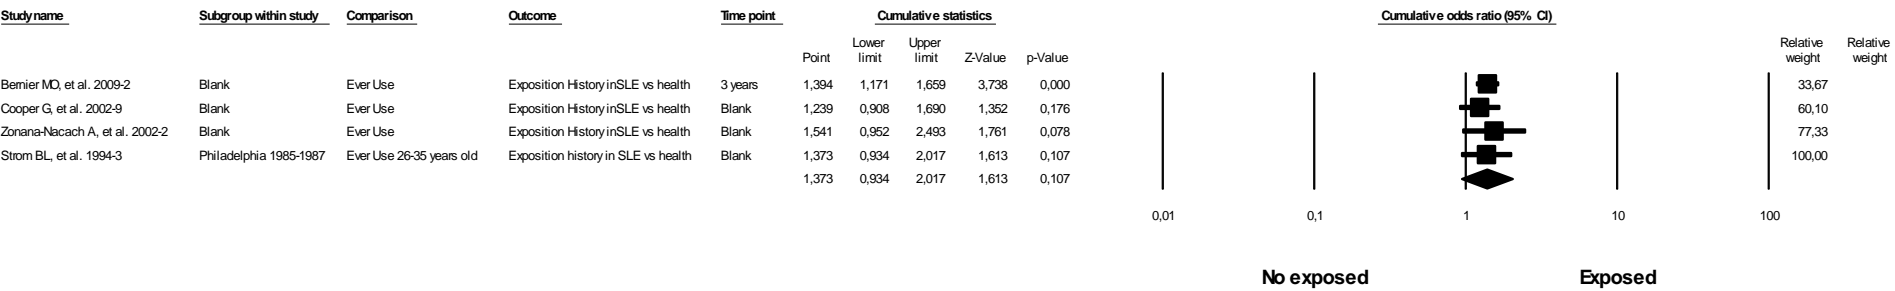



Funnel Plot of Standard Error by Log odds ratio

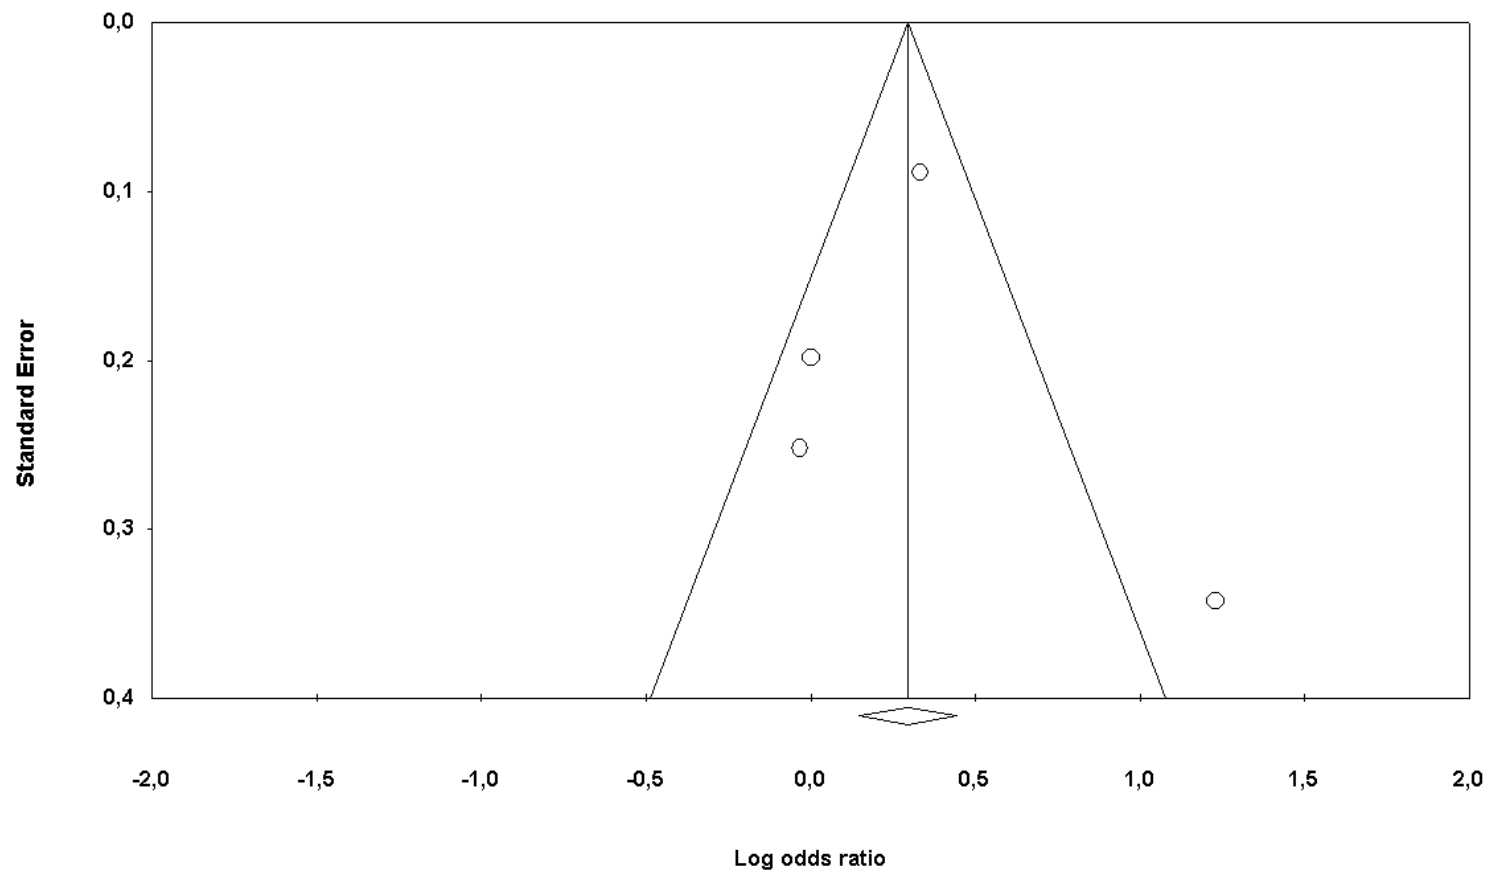

### Classic fail-safe N

|                                                               |          |
|---------------------------------------------------------------|----------|
| Z-value for observed studies                                  | 3,60364  |
| P-value for observed studies                                  | 0,00031  |
| Alpha                                                         | 0,05000  |
| Tails                                                         | 2,00000  |
| Z for alpha                                                   | 1,95996  |
| Number of observed studies                                    | 4,00000  |
| Number of missing studies that would bring p-value to > alpha | 10,00000 |

Edit

### Orwin's fail-safe N

|                                      |         |
|--------------------------------------|---------|
| Odds ratio in observed studies       | 1,34351 |
| Criterion for a 'trivial' odds ratio | 1,00000 |
| Mean odds ratio in missing studies   | 1,00000 |

Criterion must fall between other values

### **Begg and Mazumdar rank correlation**

**Kendall's S statistic (P-Q)** 2,00000

### **Kendall's tau without continuity correction**

Tau 0,33333  
z-value for tau 0,67937  
P-value (1-tailed) 0,24845  
P-value (2-tailed) 0,49691

### **Kendall's tau with continuity correction**

Tau 0,16667  
z-value for tau 0,33968  
P-value (1-tailed) 0,36705  
P-value (2-tailed) 0,73410

### **Egger's regression intercept**

|                            |           |
|----------------------------|-----------|
| Intercept                  | 0,37963   |
| Standard error             | 2,44750   |
| 95% lower limit (2-tailed) | -10,15111 |
| 95% upper limit (2-tailed) | 10,91037  |
| t-value                    | 0,15511   |
| df                         | 2,00000   |
| P-value (1-tailed)         | 0,44549   |
| P-value (2-tailed)         | 0,89098   |

### Duval and Tweedie's trim and fill

|                        |                 | Fixed Effects  |             |             | Random Effects |             |             | Q Value  |
|------------------------|-----------------|----------------|-------------|-------------|----------------|-------------|-------------|----------|
|                        | Studies Trimmed | Point Estimate | Lower Limit | Upper Limit | Point Estimate | Lower Limit | Upper Limit |          |
| <b>Observed values</b> |                 | 1,34351        | 1,15913     | 1,55723     | 1,37262        | 0,93408     | 2,01706     | 11,52761 |
| <b>Adjusted values</b> | 0               | 1,34351        | 1,15913     | 1,55723     | 1,37262        | 0,93408     | 2,01706     | 11,52761 |

#### Look for missing studies where?

- Not specified
- To left of mean
- To right of mean

#### Look for missing studies using which model?

- Not specified
- Fixed effect model
- Random effects model

|                       |                                             |
|-----------------------|---------------------------------------------|
| <b>Articles</b>       | <b>SLE C&amp;C and Cohort exposed to OC</b> |
| <b>Outcomes</b>       | <b>SLE</b>                                  |
| <b>Limits</b>         | <b>Ever Use and Ever Use according age</b>  |
| <b>Effect measure</b> | <b>OR</b>                                   |

Here we take every Strom's data according to age of exposed

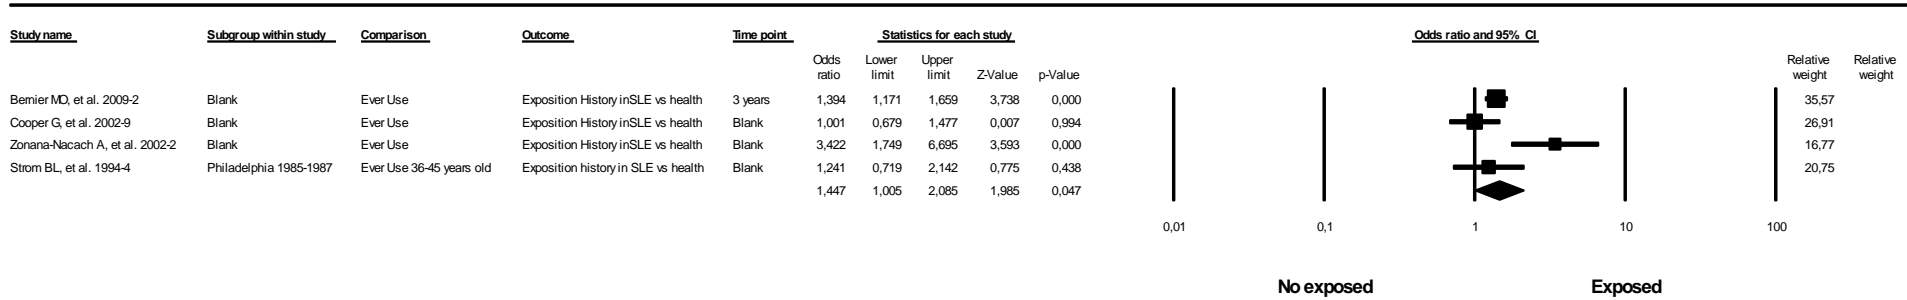









Funnel Plot of Standard Error by Log odds ratio

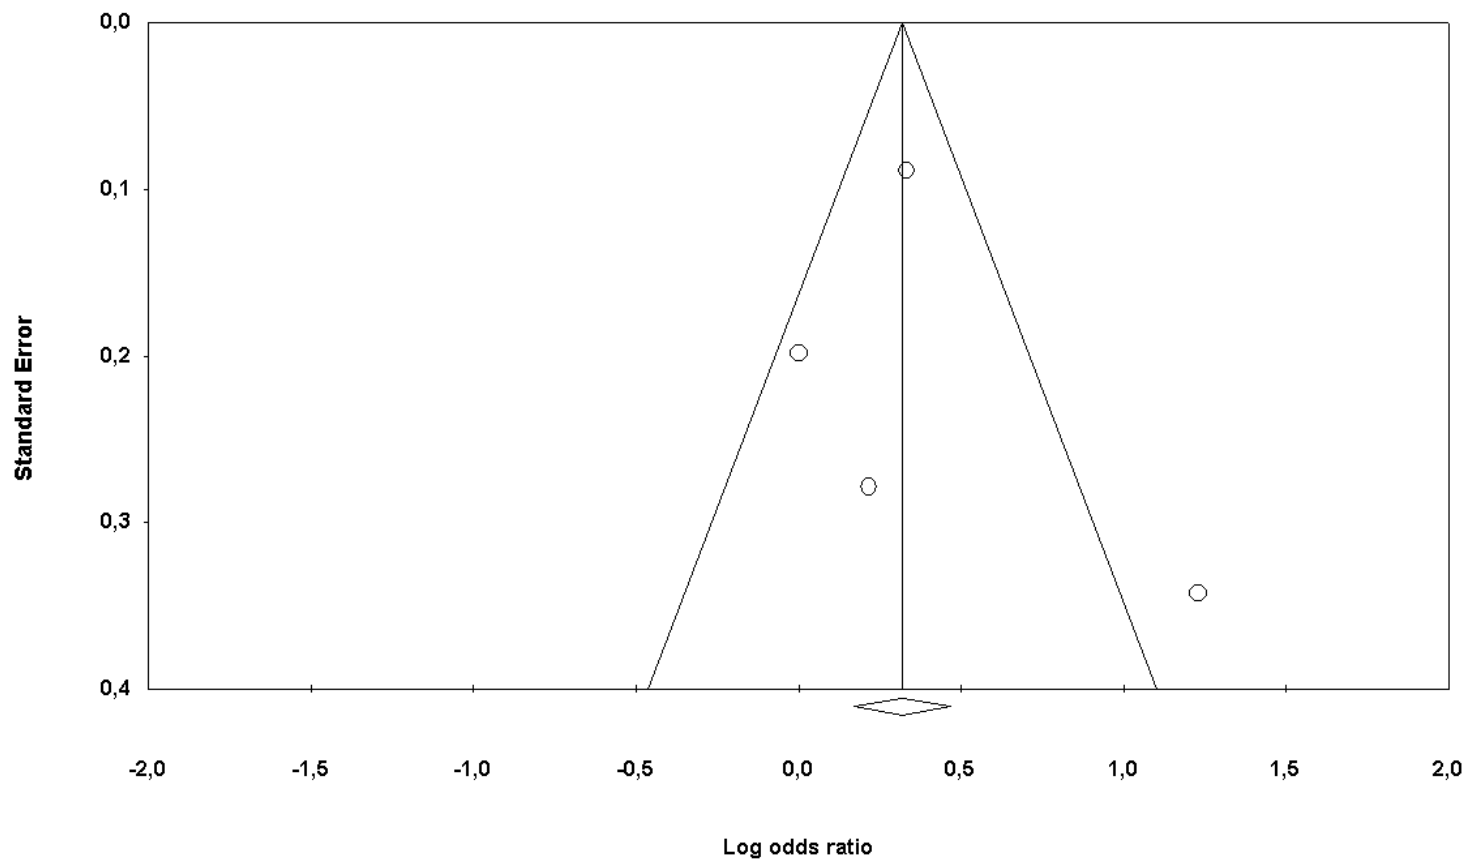

### Classic fail-safe N

|                                                               |          |
|---------------------------------------------------------------|----------|
| Z-value for observed studies                                  | 4,05690  |
| P-value for observed studies                                  | 0,00005  |
| Alpha                                                         | 0,05000  |
| Tails                                                         | 2,00000  |
| Z for alpha                                                   | 1,95996  |
| Number of observed studies                                    | 4,00000  |
| Number of missing studies that would bring p-value to > alpha | 14,00000 |

Edit

### Orwin's fail-safe N

|                                      |         |
|--------------------------------------|---------|
| Odds ratio in observed studies       | 1,37604 |
| Criterion for a 'trivial' odds ratio | 1,00000 |
| Mean odds ratio in missing studies   | 1,00000 |

Criterion must fall between other values

### **Begg and Mazumdar rank correlation**

**Kendall's S statistic (P-Q)** 2,00000

### **Kendall's tau without continuity correction**

Tau 0,33333  
z-value for tau 0,67937  
P-value (1-tailed) 0,24845  
P-value (2-tailed) 0,49691

### **Kendall's tau with continuity correction**

Tau 0,16667  
z-value for tau 0,33968  
P-value (1-tailed) 0,36705  
P-value (2-tailed) 0,73410

### **Egger's regression intercept**

|                            |          |
|----------------------------|----------|
| Intercept                  | 0,83287  |
| Standard error             | 2,13424  |
| 95% lower limit (2-tailed) | -8,35001 |
| 95% upper limit (2-tailed) | 10,01575 |
| t-value                    | 0,39024  |
| df                         | 2,00000  |
| P-value (1-tailed)         | 0,36700  |
| P-value (2-tailed)         | 0,73400  |

### Duval and Tweedie's trim and fill

|                        |                 | Fixed Effects  |             |             | Random Effects |             |             | Q Value |
|------------------------|-----------------|----------------|-------------|-------------|----------------|-------------|-------------|---------|
|                        | Studies Trimmed | Point Estimate | Lower Limit | Upper Limit | Point Estimate | Lower Limit | Upper Limit |         |
| <b>Observed values</b> |                 | 1,37604        | 1,18576     | 1,59687     | 1,44731        | 1,00465     | 2,08501     | 9,81136 |
| <b>Adjusted values</b> | 0               | 1,37604        | 1,18576     | 1,59687     | 1,44731        | 1,00465     | 2,08501     | 9,81136 |

#### Look for missing studies where?

- Not specified
- To left of mean
- To right of mean

#### Look for missing studies using which model?

- Not specified
- Fixed effect model
- Random effects model

|                       |                                             |
|-----------------------|---------------------------------------------|
| <b>Articles</b>       | <b>SLE C&amp;C and Cohort exposed to OC</b> |
| <b>Outcomes</b>       | <b>SLE</b>                                  |
| <b>Limits</b>         | <b>Ever Use and Ever Use according age</b>  |
| <b>Effect measure</b> | <b>OR</b>                                   |

Here we take every Strom's data according to age of exposed



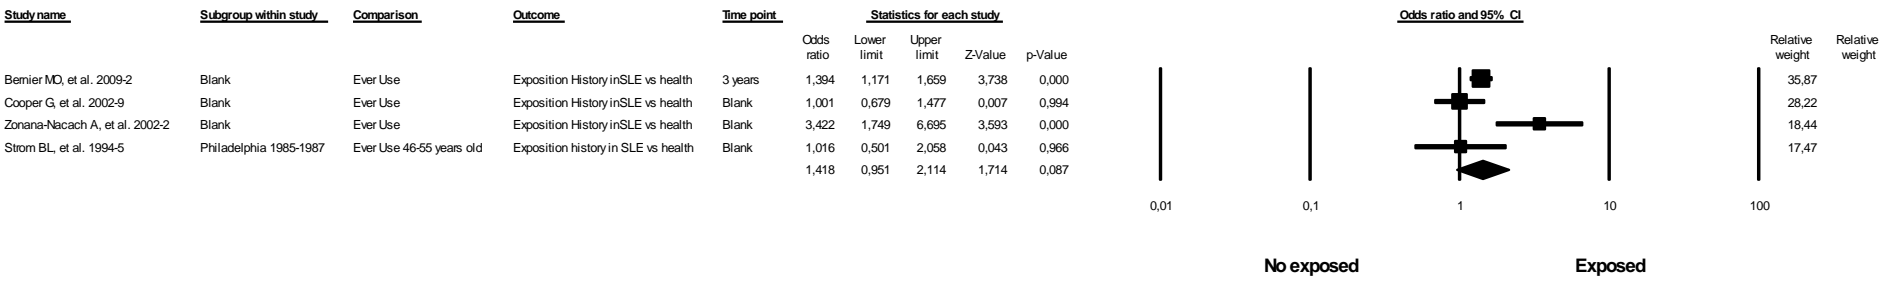





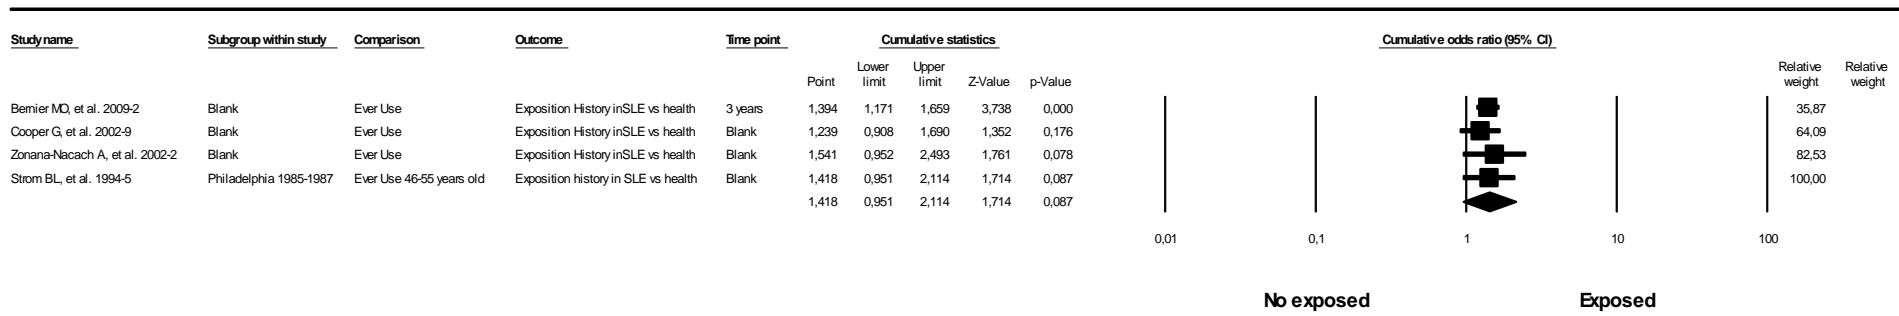

Funnel Plot of Standard Error by Log odds ratio

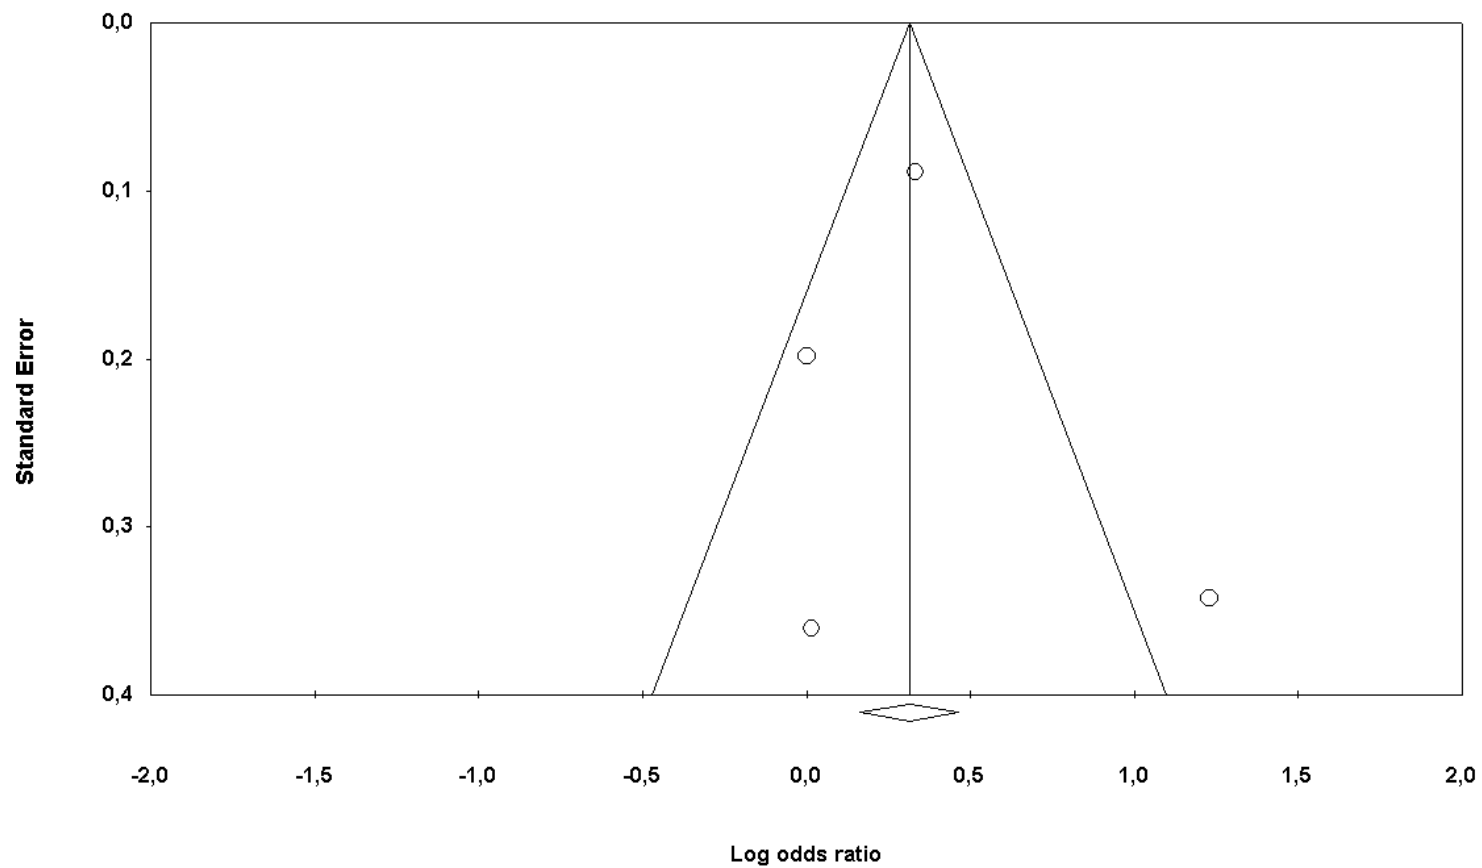

### Classic fail-safe N

|                                                               |          |
|---------------------------------------------------------------|----------|
| Z-value for observed studies                                  | 3,69081  |
| P-value for observed studies                                  | 0,00022  |
| Alpha                                                         | 0,05000  |
| Tails                                                         | 2,00000  |
| Z for alpha                                                   | 1,95996  |
| Number of observed studies                                    | 4,00000  |
| Number of missing studies that would bring p-value to > alpha | 11,00000 |

Edit

### Orwin's fail-safe N

|                                      |         |
|--------------------------------------|---------|
| Odds ratio in observed studies       | 1,36783 |
| Criterion for a 'trivial' odds ratio | 1,00000 |
| Mean odds ratio in missing studies   | 1,00000 |

Criterion must fall between other values

### **Begg and Mazumdar rank correlation**

**Kendall's S statistic (P-Q)** 0,00000

### **Kendall's tau without continuity correction**

Tau 0,00000  
z-value for tau 0,00000  
P-value (1-tailed) 0,50000  
P-value (2-tailed) 1,00000

### **Kendall's tau with continuity correction**

Tau 0,00000  
z-value for tau 0,00000  
P-value (1-tailed) 0,50000  
P-value (2-tailed) 1,00000

### **Egger's regression intercept**

|                            |          |
|----------------------------|----------|
| Intercept                  | 0,43834  |
| Standard error             | 2,12480  |
| 95% lower limit (2-tailed) | -8,70395 |
| 95% upper limit (2-tailed) | 9,58063  |
| t-value                    | 0,20630  |
| df                         | 2,00000  |
| P-value (1-tailed)         | 0,42783  |
| P-value (2-tailed)         | 0,85565  |



### Duval and Tweedie's trim and fill

|                        |                 | Fixed Effects  |             |             | Random Effects |             |             | Q Value  |
|------------------------|-----------------|----------------|-------------|-------------|----------------|-------------|-------------|----------|
|                        | Studies Trimmed | Point Estimate | Lower Limit | Upper Limit | Point Estimate | Lower Limit | Upper Limit |          |
| <b>Observed values</b> |                 | 1,36783        | 1,17600     | 1,59096     | 1,41798        | 0,95114     | 2,11397     | 10,37799 |
| <b>Adjusted values</b> | 0               | 1,36783        | 1,17600     | 1,59096     | 1,41798        | 0,95114     | 2,11397     | 10,37799 |

#### Look for missing studies where?

- Not specified
- To left of mean
- To right of mean

#### Look for missing studies using which model?

- Not specified
- Fixed effect model
- Random effects model

|                       |                                             |
|-----------------------|---------------------------------------------|
| <b>Articles</b>       | <b>SLE C&amp;C and Cohort exposed to OC</b> |
| <b>Outcomes</b>       | <b>SLE</b>                                  |
| <b>Limits</b>         | <b>Ever Use and Ever Use according age</b>  |
| <b>Effect measure</b> | <b>OR</b>                                   |

Here we take every Strom's data according to age of exposed

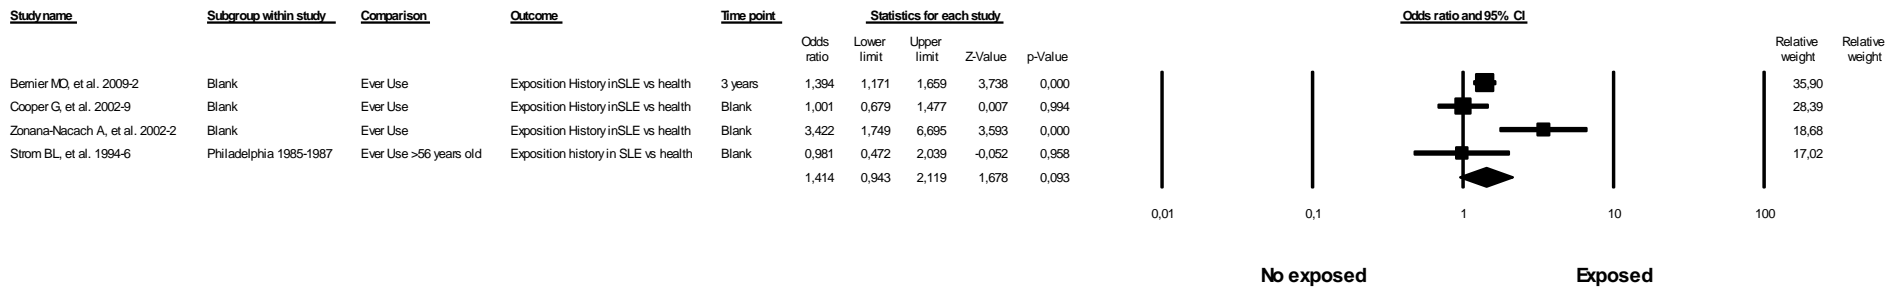







Funnel Plot of Standard Error by Log odds ratio

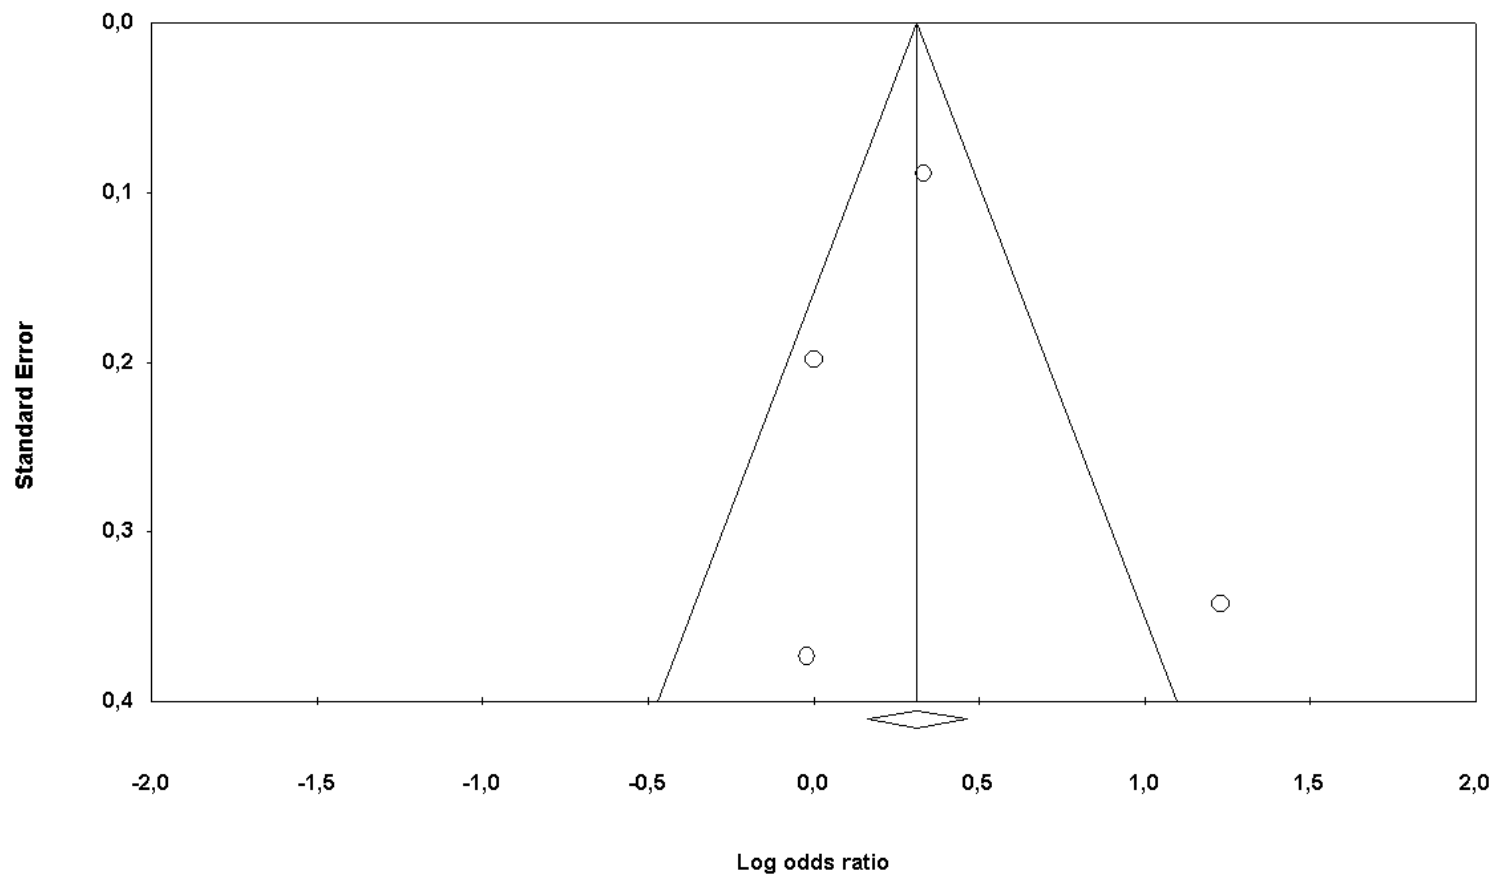

### Classic fail-safe N

|                                                               |          |
|---------------------------------------------------------------|----------|
| Z-value for observed studies                                  | 3,64304  |
| P-value for observed studies                                  | 0,00027  |
| Alpha                                                         | 0,05000  |
| Tails                                                         | 2,00000  |
| Z for alpha                                                   | 1,95996  |
| Number of observed studies                                    | 4,00000  |
| Number of missing studies that would bring p-value to > alpha | 10,00000 |

Edit

### Orwin's fail-safe N

|                                      |         |
|--------------------------------------|---------|
| Odds ratio in observed studies       | 1,36707 |
| Criterion for a 'trivial' odds ratio | 1,00000 |
| Mean odds ratio in missing studies   | 1,00000 |

Criterion must fall between other values



### **Begg and Mazumdar rank correlation**

**Kendall's S statistic (P-Q)** 0,00000

### **Kendall's tau without continuity correction**

Tau 0,00000  
z-value for tau 0,00000  
P-value (1-tailed) 0,50000  
P-value (2-tailed) 1,00000

### **Kendall's tau with continuity correction**

Tau 0,00000  
z-value for tau 0,00000  
P-value (1-tailed) 0,50000  
P-value (2-tailed) 1,00000

### **Egger's regression intercept**

|                            |          |
|----------------------------|----------|
| Intercept                  | 0,38581  |
| Standard error             | 2,12584  |
| 95% lower limit (2-tailed) | -8,76096 |
| 95% upper limit (2-tailed) | 9,53257  |
| t-value                    | 0,18148  |
| df                         | 2,00000  |
| P-value (1-tailed)         | 0,43636  |
| P-value (2-tailed)         | 0,87271  |

### Duval and Tweedie's trim and fill

|                        |                 | Fixed Effects  |             | Random Effects |                |             | Q Value     |          |
|------------------------|-----------------|----------------|-------------|----------------|----------------|-------------|-------------|----------|
|                        | Studies Trimmed | Point Estimate | Lower Limit | Upper Limit    | Point Estimate | Lower Limit | Upper Limit |          |
| <b>Observed values</b> |                 | 1,36707        | 1,17506     | 1,59045        | 1,41373        | 0,94338     | 2,11859     | 10,48964 |
| <b>Adjusted values</b> | 0               | 1,36707        | 1,17506     | 1,59045        | 1,41373        | 0,94338     | 2,11859     | 10,48964 |

#### Look for missing studies where?

- Not specified
- To left of mean
- To right of mean

#### Look for missing studies using which model?

- Not specified
- Fixed effect model
- Random effects model

|                 |                                                                |
|-----------------|----------------------------------------------------------------|
| <b>Articles</b> | <b>C&amp;C SLE vs<br/>Healthy and<br/>Cohorte using<br/>OC</b> |
| Outcomes        | SLE                                                            |
| Limits          | Ever use<br>1-11 Mo                                            |
| Effect measure  | OR                                                             |





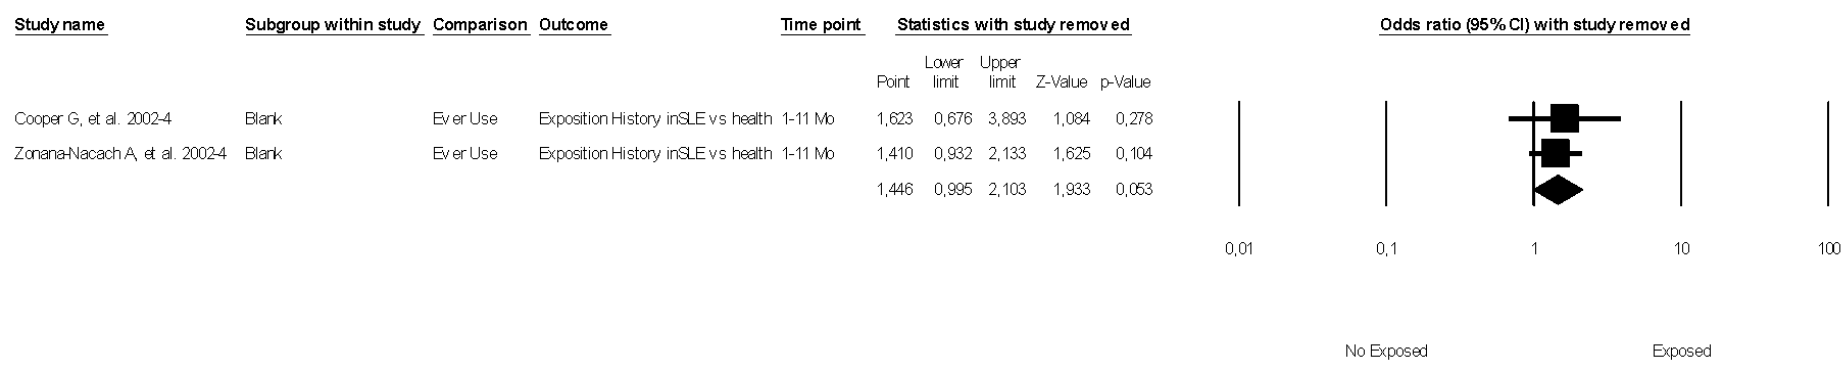

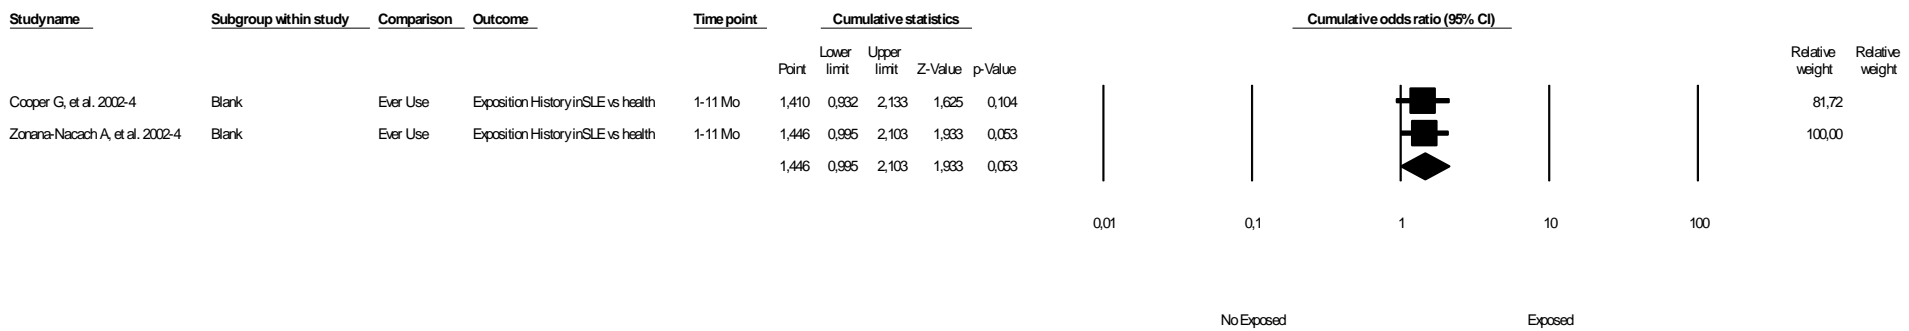



There are not enough data to realice Funnel Plot and the others estimates

|                 |                                                                |
|-----------------|----------------------------------------------------------------|
| <b>Articles</b> | <b>C&amp;C SLE vs<br/>Healthy and<br/>Cohorte using<br/>OC</b> |
| Outcomes        | SLE                                                            |
| Limits          | Ever use<br>12 + Mo                                            |
| Effect measure  | OR                                                             |

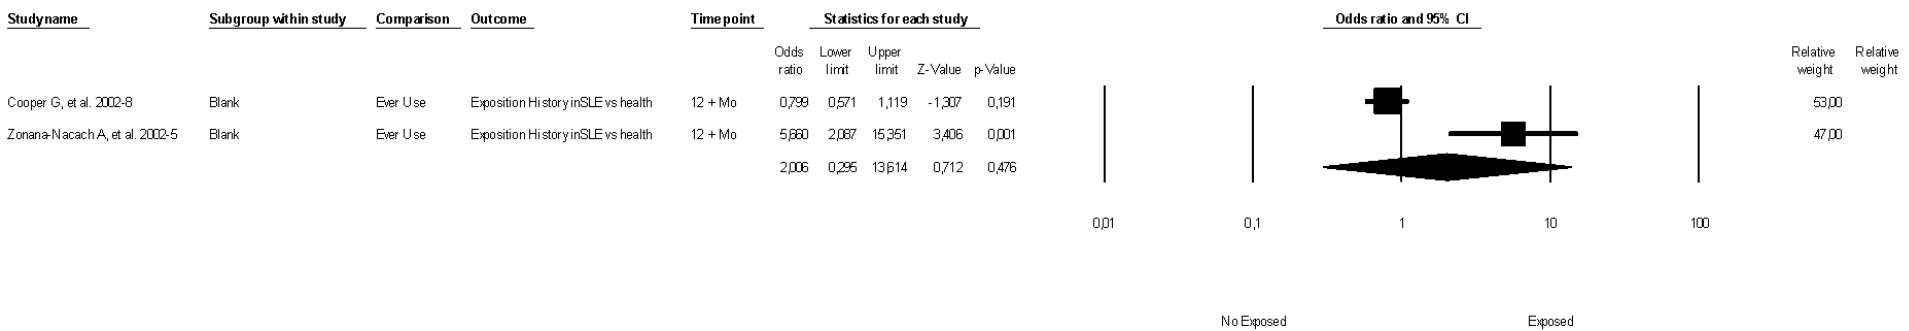



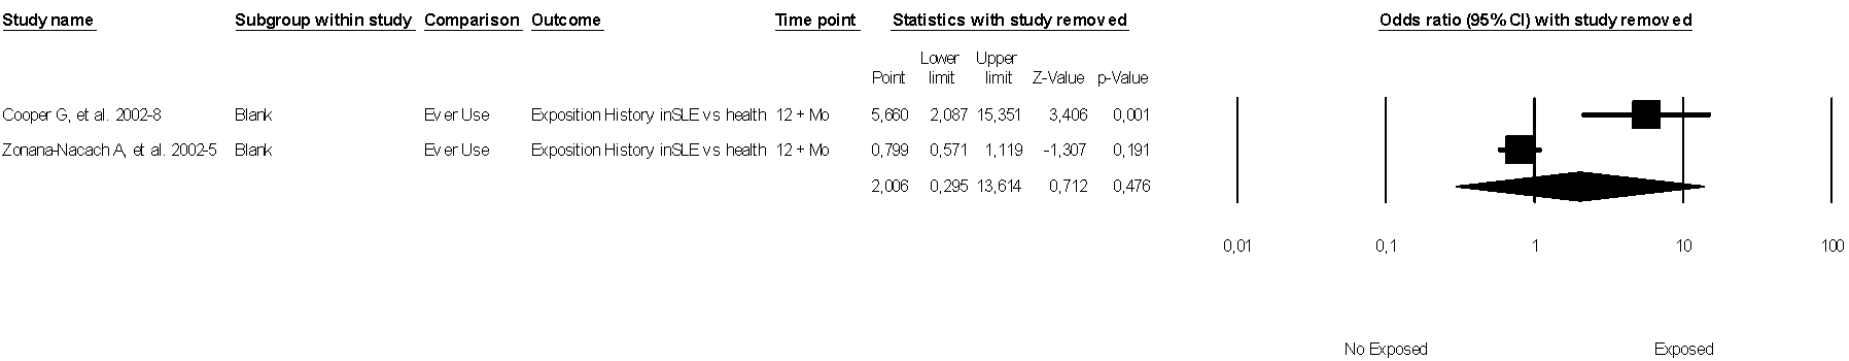

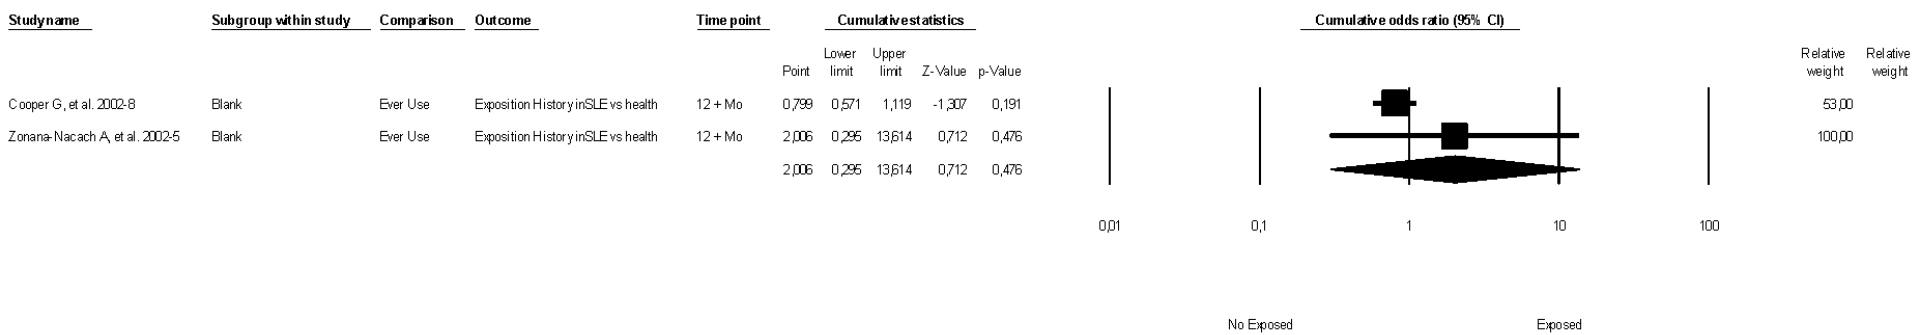

There are not enough data to realice Funnel Plot and the others estimates

|                 |                                                                |
|-----------------|----------------------------------------------------------------|
| <b>Articles</b> | <b>C&amp;C SLE vs<br/>Healthy and<br/>Cohorte using<br/>OC</b> |
| Outcomes        | SLE                                                            |
| Limits          | Past Use<br>only exposition                                    |
| Effect measure  | OR                                                             |



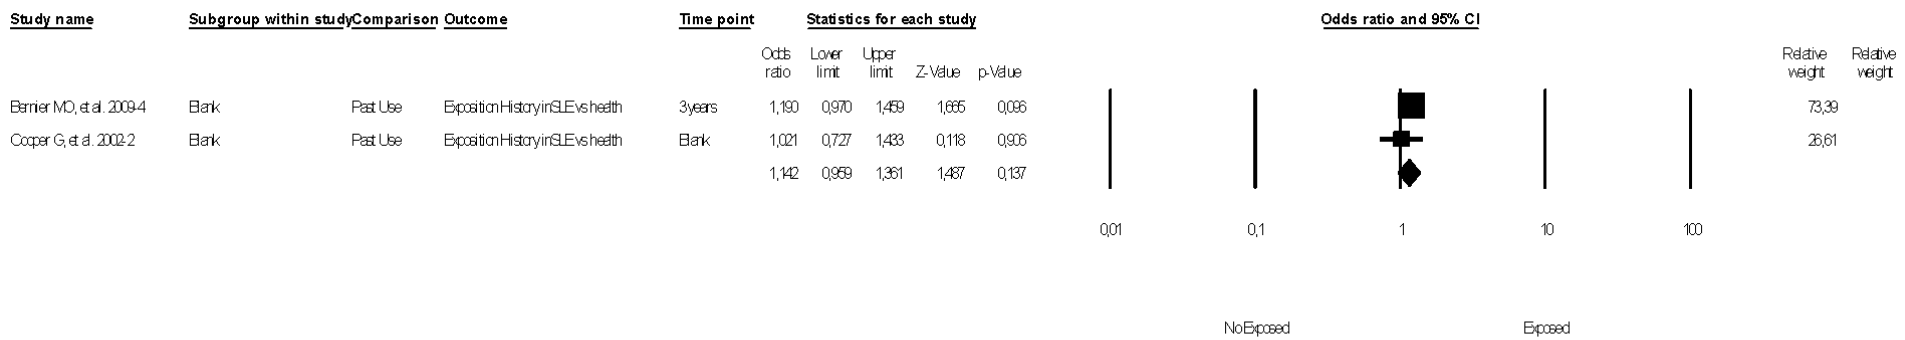



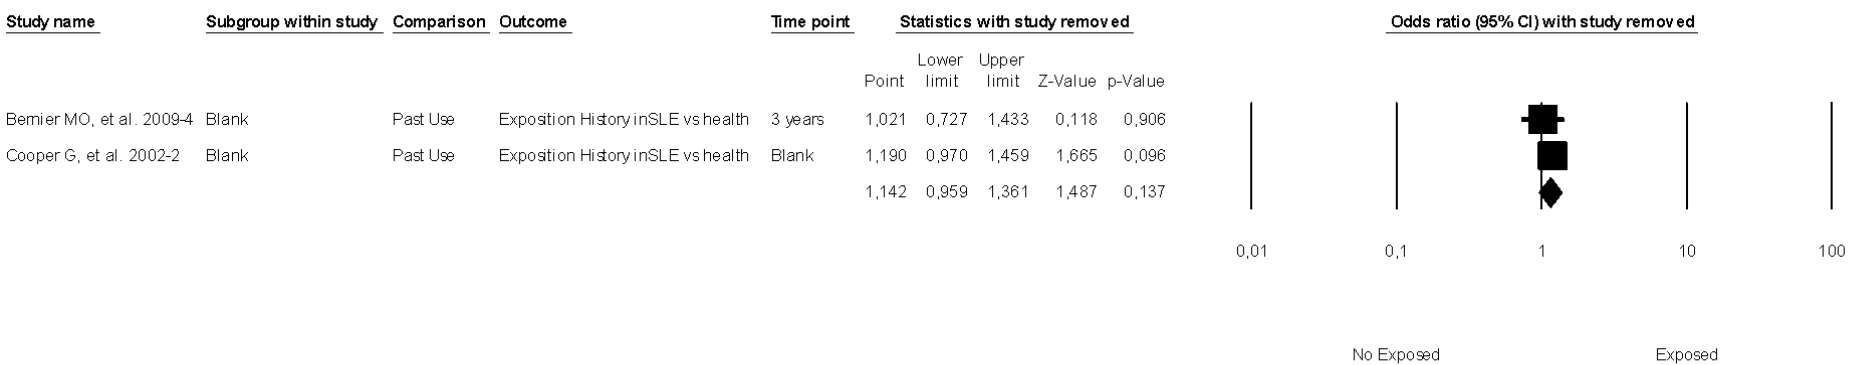

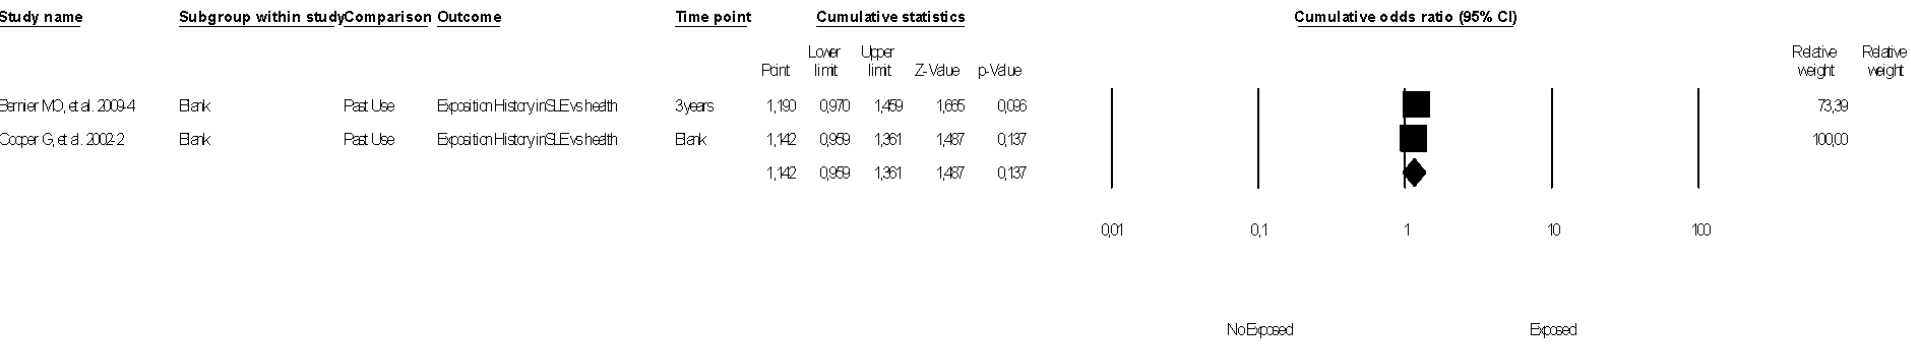

There are not enough data to realice Funnel Plot and the others estimates

|                       |                                              |
|-----------------------|----------------------------------------------|
| <b>Articles</b>       | <b>SLE C&amp;C and Cohort exposed to OC</b>  |
| <b>Outcomes</b>       | <b>SLE</b>                                   |
| <b>Limits</b>         | <b>Past Use and 3 years before Diagnosis</b> |
| <b>Effect measure</b> | <b>OR</b>                                    |

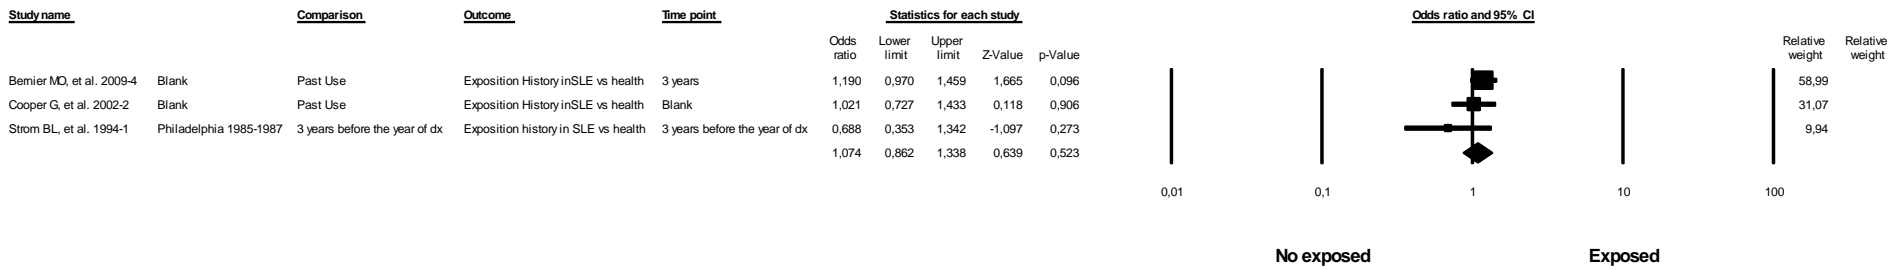









Funnel Plot of Standard Error by Log odds ratio

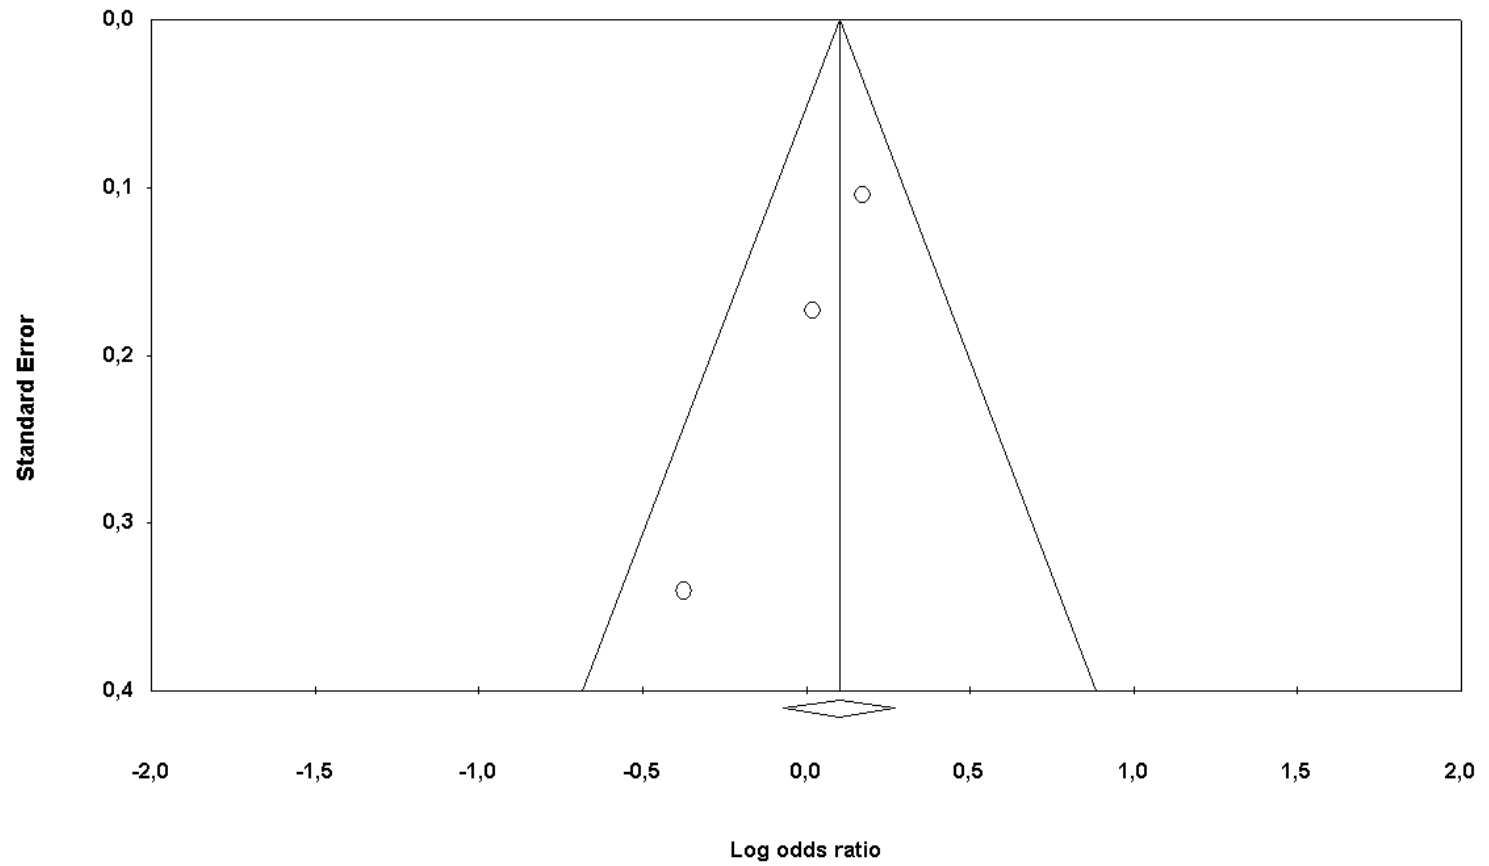

### Classic fail-safe N

|                                                               |         |
|---------------------------------------------------------------|---------|
| Z-value for observed studies                                  | 0,39570 |
| P-value for observed studies                                  | 0,69233 |
| Alpha                                                         | 0,05000 |
| Tails                                                         | 2,00000 |
| Z for alpha                                                   | 1,95996 |
| Number of observed studies                                    | 3,00000 |
| Number of missing studies that would bring p-value to > alpha | 0,00000 |

Edit

### Orwin's fail-safe N

|                                      |         |
|--------------------------------------|---------|
| Odds ratio in observed studies       | 1,10542 |
| Criterion for a 'trivial' odds ratio | 1,00000 |
| Mean odds ratio in missing studies   | 1,00000 |

Criterion must fall between other values

### **Begg and Mazumdar rank correlation**

**Kendall's S statistic (P-Q)** -3,00000

### **Kendall's tau without continuity correction**

Tau -1,00000  
z-value for tau 1,56670  
P-value (1-tailed) 0,05859  
P-value (2-tailed) 0,11719

### **Kendall's tau with continuity correction**

Tau -0,66667  
z-value for tau 1,04447  
P-value (1-tailed) 0,14813  
P-value (2-tailed) 0,29627

### **Egger's regression intercept**

|                            |          |
|----------------------------|----------|
| Intercept                  | -2,30125 |
| Standard error             | 0,04233  |
| 95% lower limit (2-tailed) | -2,83906 |
| 95% upper limit (2-tailed) | -1,76343 |
| t-value                    | 54,36848 |
| df                         | 1,00000  |
| P-value (1-tailed)         | 0,00585  |
| P-value (2-tailed)         | 0,01171  |

### Duval and Tweedie's trim and fill

|                        | Fixed Effects   |                |             |             | Random Effects |             |             | Q Value |
|------------------------|-----------------|----------------|-------------|-------------|----------------|-------------|-------------|---------|
|                        | Studies Trimmed | Point Estimate | Lower Limit | Upper Limit | Point Estimate | Lower Limit | Upper Limit |         |
| <b>Observed values</b> |                 | 1,10542        | 0,93316     | 1,30948     | 1,07428        | 0,86246     | 1,33811     | 2,64396 |
| <b>Adjusted values</b> | 0               | 1,10542        | 0,93316     | 1,30948     | 1,07428        | 0,86246     | 1,33811     | 2,64396 |

#### Look for missing studies where?

- Not specified
- To left of mean
- To right of mean

#### Look for missing studies using which model?

- Not specified
- Fixed effect model
- Random effects model

|                       |                                                                          |
|-----------------------|--------------------------------------------------------------------------|
| <b>Articles</b>       | <b>SLE Cohort nested<br/>Cross-sectional &amp;<br/>RCT exposed to OC</b> |
| <b>Outcomes</b>       | <b>Thrombosis</b>                                                        |
| <b>Limits</b>         | <b>Use during the<br/>study</b>                                          |
| <b>Effect measure</b> | <b>OR</b>                                                                |



| Study name                  | Subgroup within study | Comparison | Outcome                                     | Time point | Statistics for each study |             |             |         |         |
|-----------------------------|-----------------------|------------|---------------------------------------------|------------|---------------------------|-------------|-------------|---------|---------|
|                             |                       |            |                                             |            | Odds ratio                | Lower limit | Upper limit | Z-Value | p-Value |
| Petri M, et al. 2005-13     | SLE                   | RDBCT      | Venous Thrombosis Requiring hospitalization | 12 Months  | 2,045                     | 0,182       | 22,955      | 0,580   | 0,562   |
| Choojitaram K, et al 2008-1 | SLE                   | Ever Use   | Thrombosis                                  | Blank      | 13,533                    | 0,669       | 273,619     | 1,698   | 0,089   |
|                             |                       |            |                                             |            | 4,296                     | 0,653       | 28,275      | 1,516   | 0,129   |

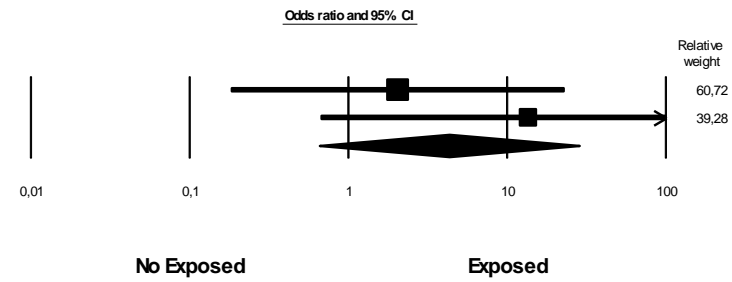



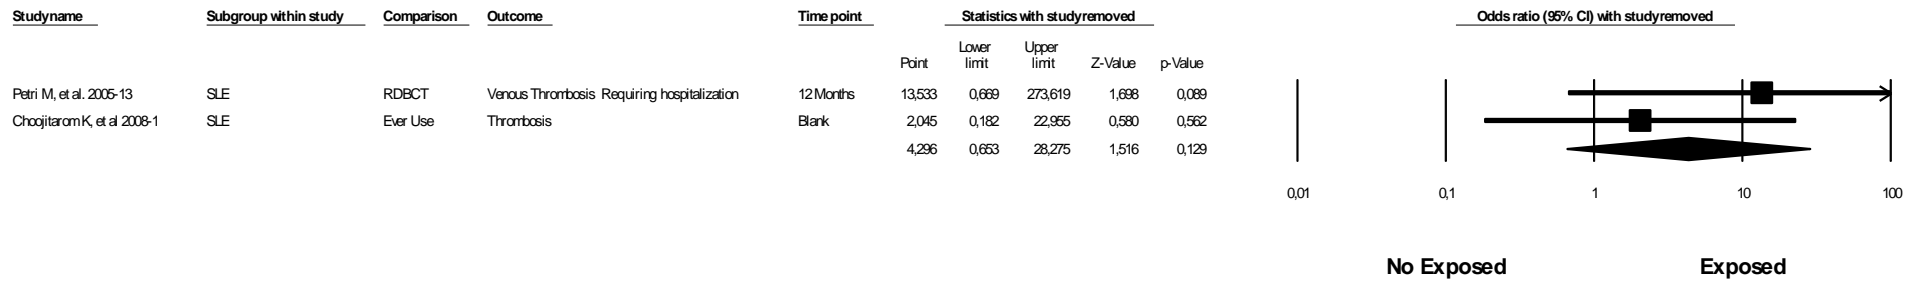



There are not enough data to realice Funnel Plot and the others estimates

|                       |                                                                              |
|-----------------------|------------------------------------------------------------------------------|
| <b>Articles</b>       | <b>SLE Cohort nested<br/>Cross-sectional &amp;<br/>RCT exposed to<br/>OC</b> |
| <b>Outcomes</b>       | <b>Thrombosis</b>                                                            |
| <b>Limits</b>         | Any time<br>independent<br>thrombosis which<br>introduced                    |
| <b>Effect measure</b> | <b>OR</b>                                                                    |

| Study name                         | Subgroup within study | Comparison       | Outcome                                           | Time point              | Statistics for each study |             |             |         |         |
|------------------------------------|-----------------------|------------------|---------------------------------------------------|-------------------------|---------------------------|-------------|-------------|---------|---------|
|                                    |                       |                  |                                                   |                         | Odds ratio                | Lower limit | Upper limit | Z-Value | p-Value |
| Sanchez-Guerrero J, et al. 2005-30 | All SLE               | RCT Single blind | Deep thrombosis (arterial and venous)             | After Tto               | 1,000                     | 0,136       | 7,369       | 0,000   | 1,000   |
| Petri M, et al. 2005-13            | SLE                   | RDBCT            | Venous Thrombosis Requiring hospitalization       | 12 Months               | 2,045                     | 0,182       | 22,955      | 0,580   | 0,562   |
| Petri M, et al. 2005-15            | SLE                   | RDBCT            | Venous Thrombosis Requiring withdrawal medication | After discontinued drug | 0,198                     | 0,009       | 4,178       | -1,041  | 0,298   |
| Choojitarom K, et al 2008-1        | SLE                   | Ever Use         | Thrombosis                                        | Blank                   | 13,533                    | 0,669       | 273,619     | 1,698   | 0,089   |
|                                    |                       |                  |                                                   |                         | 1,475                     | 0,341       | 6,376       | 0,521   | 0,603   |

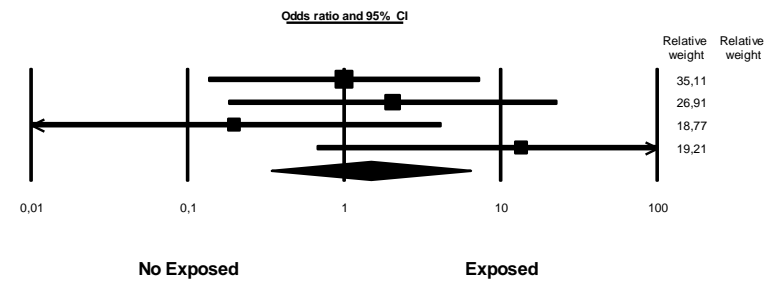







| Study name                         | Subgroup within study | Comparison       | Outcome                                           | Time point              | Cumulative statistics |             |             |         |         |
|------------------------------------|-----------------------|------------------|---------------------------------------------------|-------------------------|-----------------------|-------------|-------------|---------|---------|
|                                    |                       |                  |                                                   |                         | Point                 | Lower limit | Upper limit | Z-Value | p-Value |
| Sanchez-Guerrero J, et al. 2005-30 | All SLE               | RCT Single blind | Deep thrombosis (arterial and venous)             | After Tto               | 1,000                 | 0,136       | 7,369       | 0,000   | 1,000   |
| Petri M, et al. 2005-13            | SLE                   | RDBCT            | Venous Thrombosis Requiring hospitalization       | 12 Months               | 1,337                 | 0,287       | 6,234       | 0,369   | 0,712   |
| Petri M, et al. 2005-15            | SLE                   | RDBCT            | Venous Thrombosis Requiring withdrawal medication | After discontinued drug | 0,907                 | 0,229       | 3,585       | -0,140  | 0,889   |
| Choojitaram K, et al 2008-1        | SLE                   | Ever Use         | Thrombosis                                        | Blank                   | 1,475                 | 0,341       | 6,376       | 0,521   | 0,603   |
|                                    |                       |                  |                                                   |                         | 1,475                 | 0,341       | 6,376       | 0,521   | 0,603   |

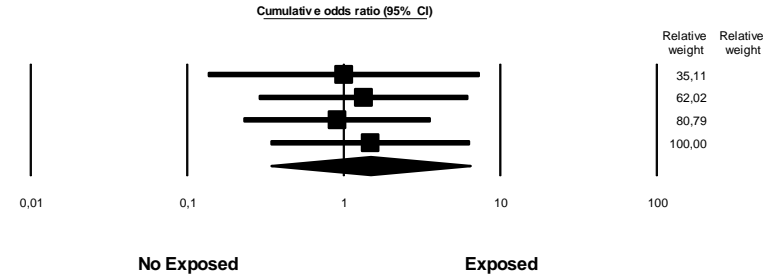

Funnel Plot of Standard Error by Log odds ratio

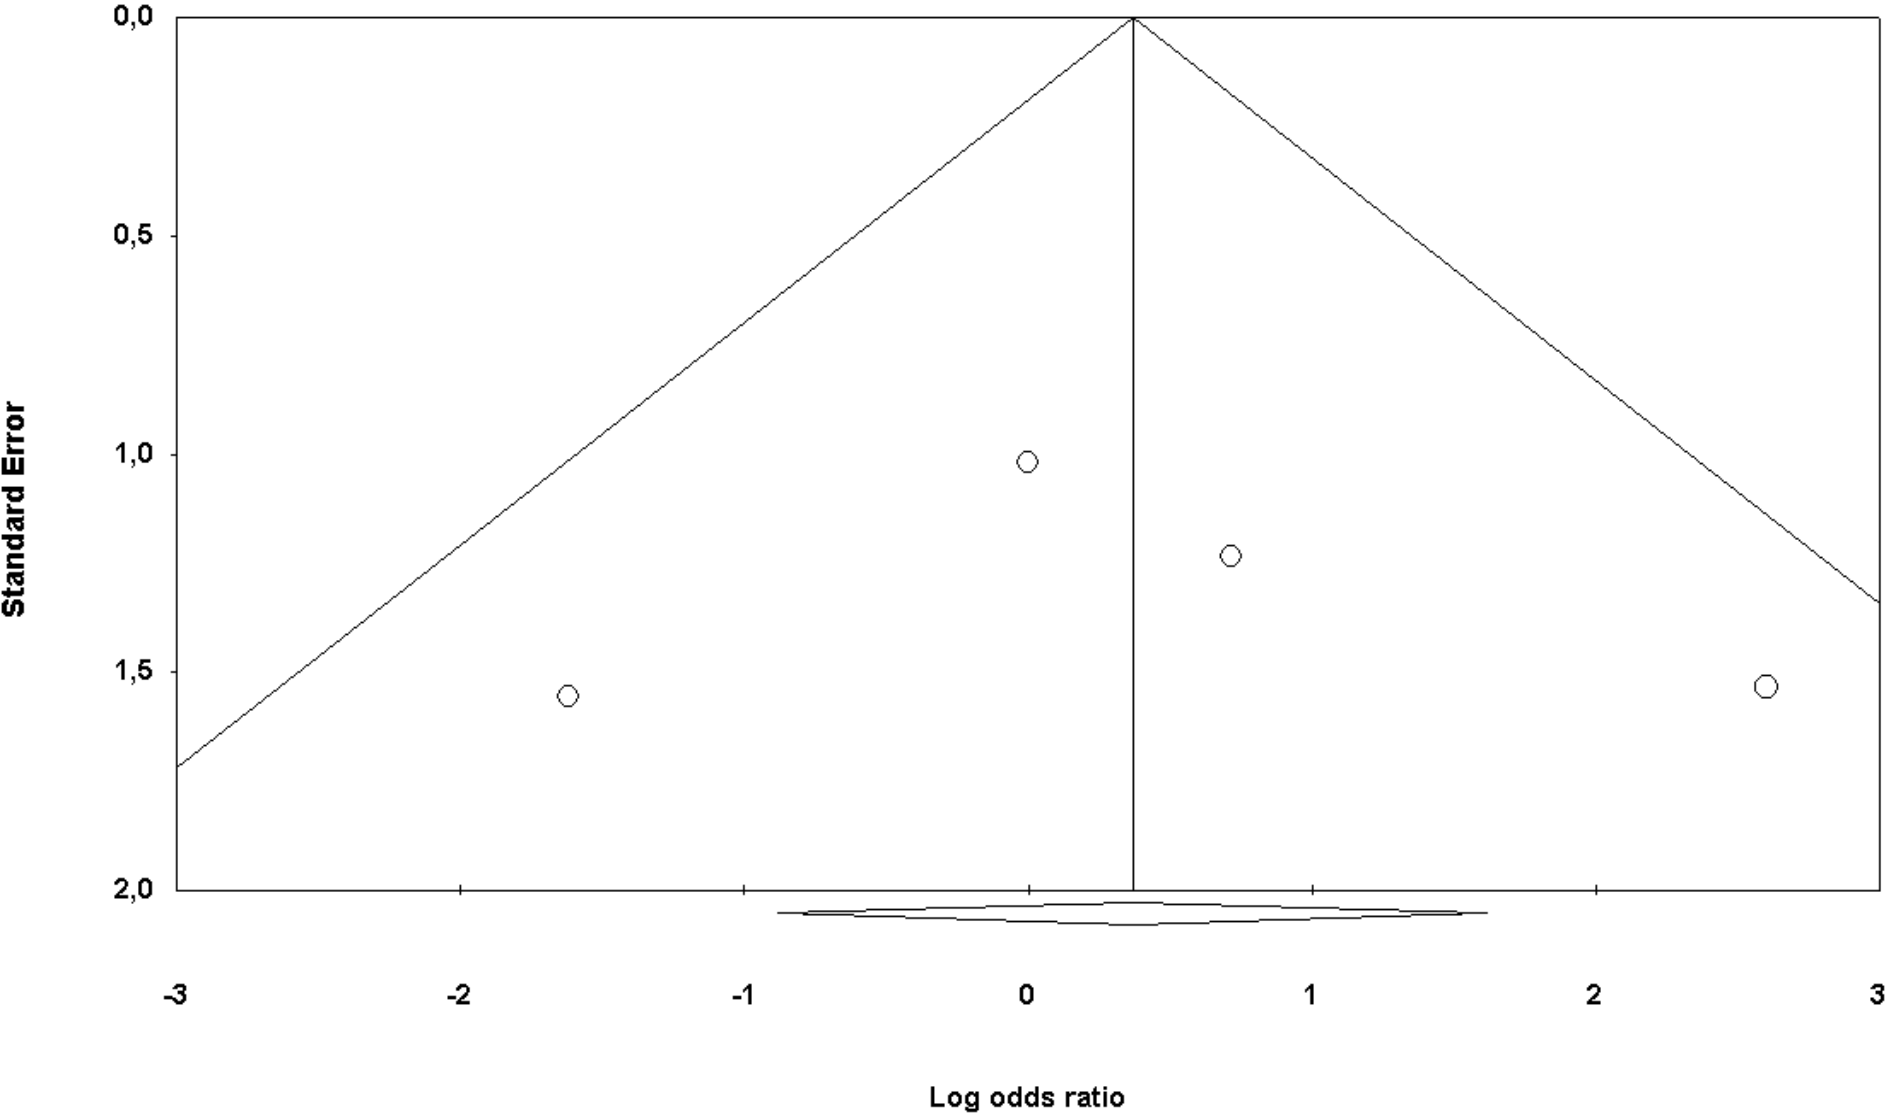

### Classic fail-safe N

|                                                               |         |
|---------------------------------------------------------------|---------|
| Z-value for observed studies                                  | 0,61844 |
| P-value for observed studies                                  | 0,53629 |
| Alpha                                                         | 0,05000 |
| Tails                                                         | 2,00000 |
| Z for alpha                                                   | 1,95996 |
| Number of observed studies                                    | 4,00000 |
| Number of missing studies that would bring p-value to > alpha | 0,00000 |

Edit

### Orwin's fail-safe N

|                                      |         |
|--------------------------------------|---------|
| Odds ratio in observed studies       | 1,44693 |
| Criterion for a 'trivial' odds ratio | 1,00000 |
| Mean odds ratio in missing studies   | 1,00000 |

Criterion must fall between other values

### **Begg and Mazumdar rank correlation**

**Kendall's S statistic (P-Q)** 0,00000

### **Kendall's tau without continuity correction**

Tau 0,00000  
z-value for tau 0,00000  
P-value (1-tailed) 0,50000  
P-value (2-tailed) 1,00000

### **Kendall's tau with continuity correction**

Tau 0,00000  
z-value for tau 0,00000  
P-value (1-tailed) 0,50000  
P-value (2-tailed) 1,00000

### **Egger's regression intercept**

|                            |           |
|----------------------------|-----------|
| Intercept                  | 0,77675   |
| Standard error             | 3,95518   |
| 95% lower limit (2-tailed) | -16,24103 |
| 95% upper limit (2-tailed) | 17,79453  |
| t-value                    | 0,19639   |
| df                         | 2,00000   |
| P-value (1-tailed)         | 0,43123   |
| P-value (2-tailed)         | 0,86245   |

### Duval and Tweedie's trim and fill

|                        |                 | Fixed Effects  |             |             | Random Effects |             |             | Q Value |
|------------------------|-----------------|----------------|-------------|-------------|----------------|-------------|-------------|---------|
|                        | Studies Trimmed | Point Estimate | Lower Limit | Upper Limit | Point Estimate | Lower Limit | Upper Limit |         |
| <b>Observed values</b> |                 | 1,44693        | 0,41446     | 5,05140     | 1,47538        | 0,34137     | 6,37656     | 3,96904 |
| <b>Adjusted values</b> | 0               | 1,44693        | 0,41446     | 5,05140     | 1,47538        | 0,34137     | 6,37656     | 3,96904 |

#### Look for missing studies where?

- Not specified
- To left of mean
- To right of mean

#### Look for missing studies using which model?

- Not specified
- Fixed effect model
- Random effects model

|                |                          |
|----------------|--------------------------|
| Articles       | RCT exposed to OC        |
| Outcomes       | Thrombosis After Therapy |
| Limits         | SLE and All SLE          |
| Effect measure | RR                       |



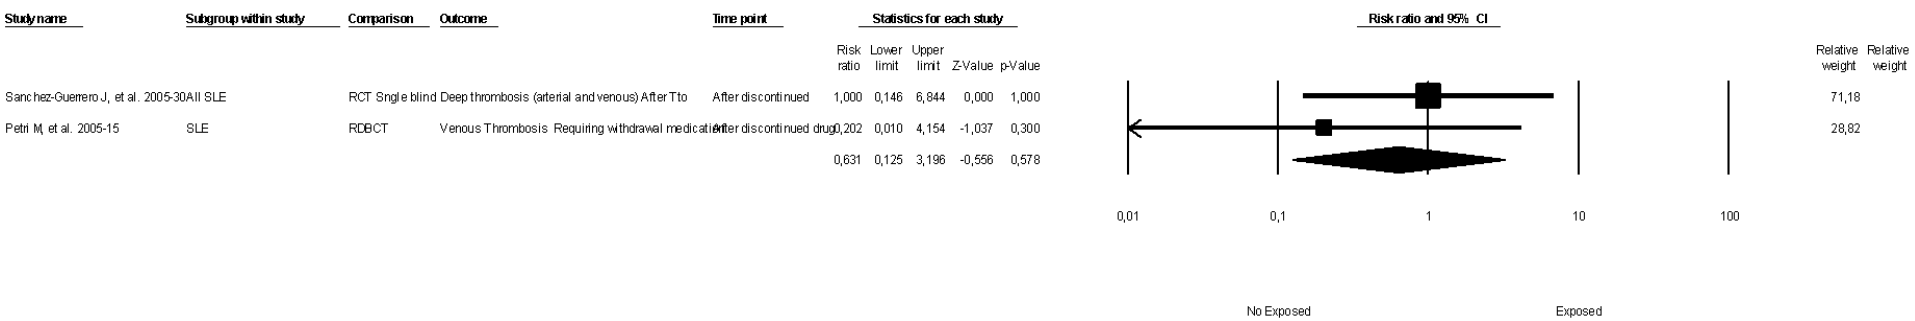



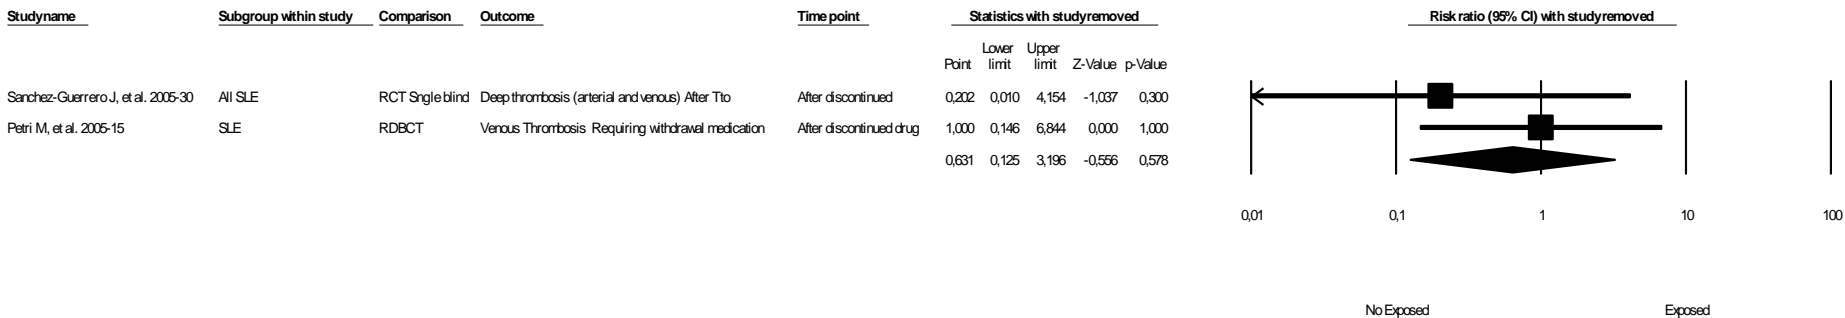



There are not enough data to realice Funnel Plot and the others estimates

|                 |                                                 |
|-----------------|-------------------------------------------------|
| <b>Articles</b> | <b>RCT Women<br/>with SLE<br/>exposed to OC</b> |
| Outcomes        | Flares                                          |
| Limits          | All flares<br>combining<br>subtypes             |
| Effect measure  | RR                                              |

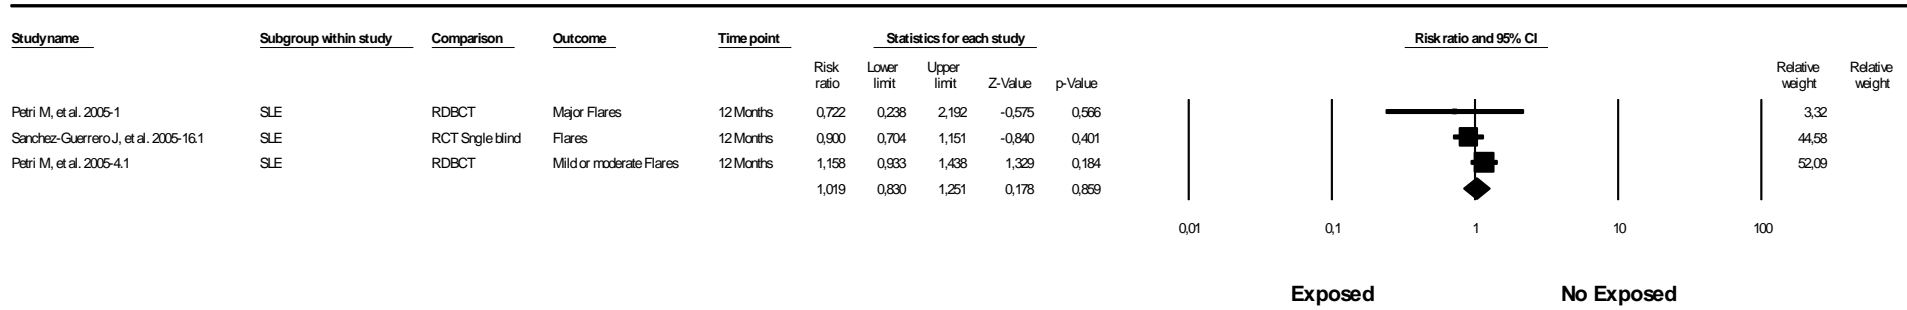





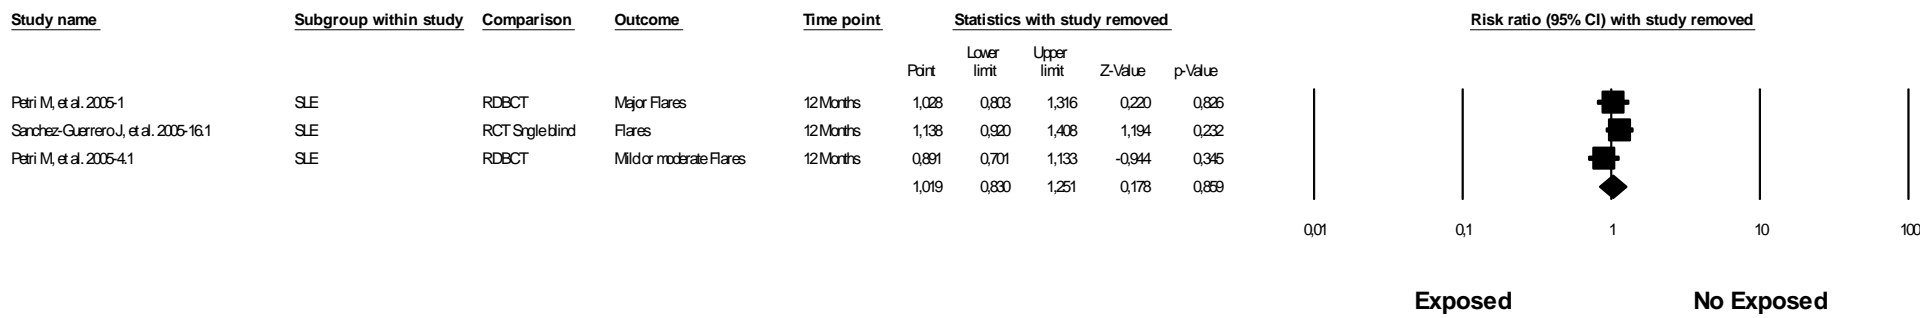



Funnel Plot of Standard Error by Log risk ratio

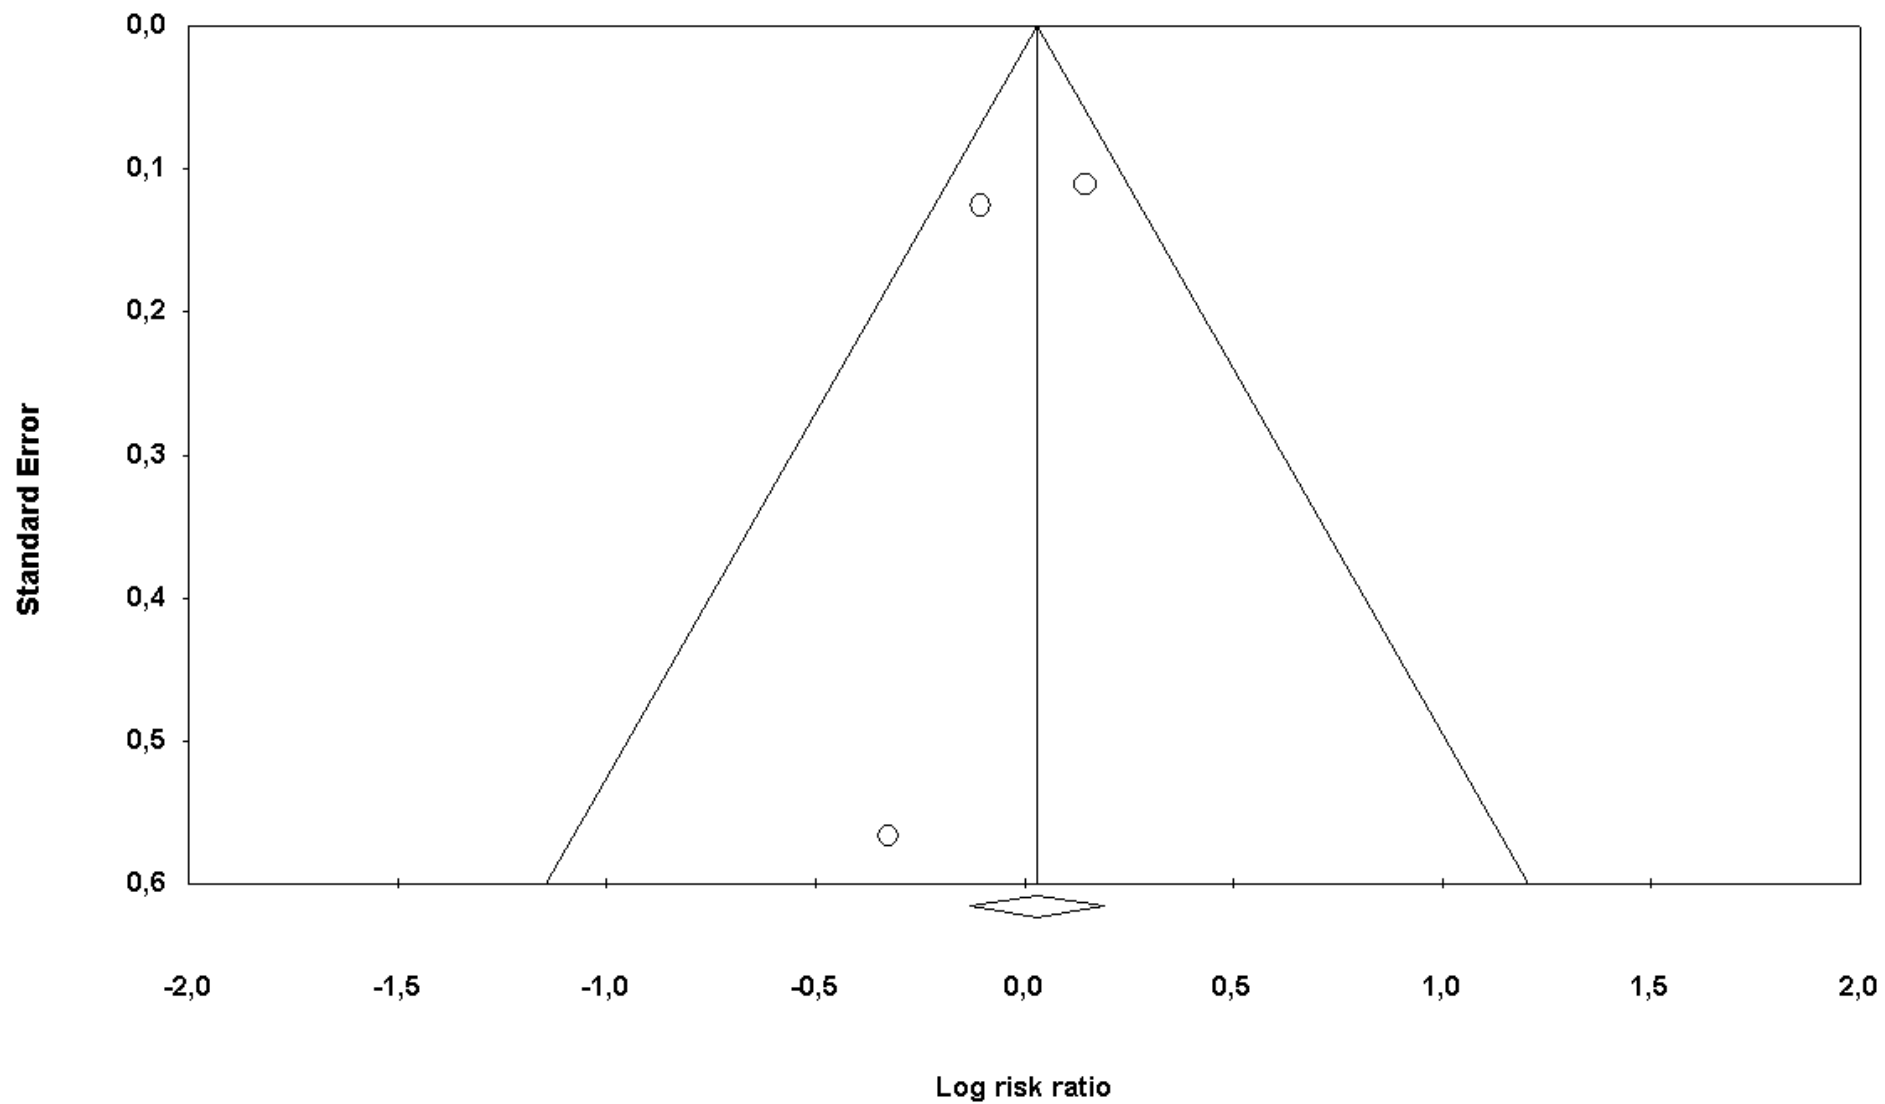

### Classic fail-safe N

|                                                               |          |
|---------------------------------------------------------------|----------|
| Z-value for observed studies                                  | -0,04950 |
| P-value for observed studies                                  | 0,96052  |
| Alpha                                                         | 0,05000  |
| Tails                                                         | 2,00000  |
| Z for alpha                                                   | 1,95996  |
| Number of observed studies                                    | 3,00000  |
| Number of missing studies that would bring p-value to > alpha | 0,00000  |

Edit

### Orwin's fail-safe N

|                                      |         |
|--------------------------------------|---------|
| Risk ratio in observed studies       | 1,02951 |
| Criterion for a 'trivial' risk ratio | 1,00000 |
| Mean risk ratio in missing studies   | 1,00000 |

Criterion must fall between other values

### **Begg and Mazumdar rank correlation**

**Kendall's S statistic (P-Q)** -1,00000

### **Kendall's tau without continuity correction**

Tau -0,33333  
z-value for tau 0,52223  
P-value (1-tailed) 0,30075  
P-value (2-tailed) 0,60151

### **Kendall's tau with continuity correction**

Tau 0,00000  
z-value for tau 0,00000  
P-value (1-tailed) 0,50000  
P-value (2-tailed) 1,00000

### **Egger's regression intercept**

|                            |           |
|----------------------------|-----------|
| Intercept                  | -1,01237  |
| Standard error             | 1,80506   |
| 95% lower limit (2-tailed) | -23,94779 |
| 95% upper limit (2-tailed) | 21,92304  |
| t-value                    | 0,56085   |
| df                         | 1,00000   |
| P-value (1-tailed)         | 0,33730   |
| P-value (2-tailed)         | 0,67460   |

### Duval and Tweedie's trim and fill

|                        |                 | Fixed Effects  |             |             | Random Effects |             |             | Q Value |
|------------------------|-----------------|----------------|-------------|-------------|----------------|-------------|-------------|---------|
|                        | Studies Trimmed | Point Estimate | Lower Limit | Upper Limit | Point Estimate | Lower Limit | Upper Limit |         |
| <b>Observed values</b> |                 | 1,02951        | 0,87662     | 1,20907     | 1,01881        | 0,82975     | 1,25094     | 2,67493 |
| <b>Adjusted values</b> | 0               | 1,02951        | 0,87662     | 1,20907     | 1,01881        | 0,82975     | 1,25094     | 2,67493 |

#### Look for missing studies where?

- Not specified
- To left of mean
- To right of mean

#### Look for missing studies using which model?

- Not specified
- Fixed effect model
- Random effects model

|                 |                                                 |
|-----------------|-------------------------------------------------|
| <b>Articles</b> | <b>RCT Women<br/>with SLE<br/>exposed to OC</b> |
| Outcomes        | Major Flares                                    |
| Limits          | Major or severe<br>flares                       |
| Effect measure  | RR                                              |







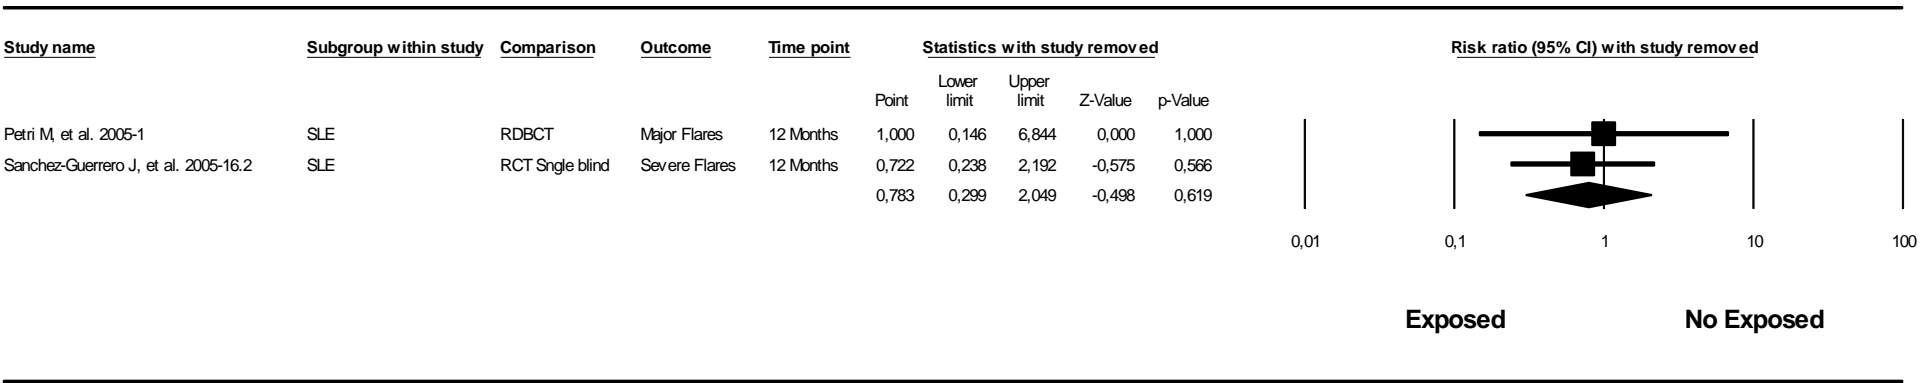



There are not enough data to realice Funnel Plot and the others estimates

|                 |                                           |
|-----------------|-------------------------------------------|
| <b>Articles</b> | <b>SLE RCT<br/>exposed to OC</b>          |
| Outcomes        | Disease Activity                          |
| Limits          | SLE any change<br>in activity<br>(SLEDAI) |
| Effect measure  | Difference mean                           |

| Studyname                         | Subgroup within study | Comparison       | Outcome            | Time point | Statistics for each study |                |          |             |             |         | Difference in means and 95% CI |  | Relative weight | Relative weight |  |
|-----------------------------------|-----------------------|------------------|--------------------|------------|---------------------------|----------------|----------|-------------|-------------|---------|--------------------------------|--|-----------------|-----------------|--|
|                                   |                       |                  |                    |            | Difference in means       | Standard error | Variance | Lower limit | Upper limit | Z-Value | p-Value                        |  |                 |                 |  |
| Sanchez-Guerrero J, et al. 2005-8 | SLE                   | RCT Single blind | Max SLEDAI         | 12 Months  | 0,400                     | 0,943          | 0,889    | -1,448      | 2,248       | 0,424   | 0,671                          |  |                 | 49,75           |  |
| Petri M, et al. 2005-11           | SLE                   | RDBCT            | Mean Change SLEDAI | 12 Months  | 12,110                    | 0,457          | 0,209    | 11,215      | 13,005      | 26,510  | 0,000                          |  |                 | 50,25           |  |
|                                   |                       |                  |                    |            | 6,284                     | 5,855          | 34,280   | -5,191      | 17,760      | 1,073   | 0,283                          |  |                 |                 |  |

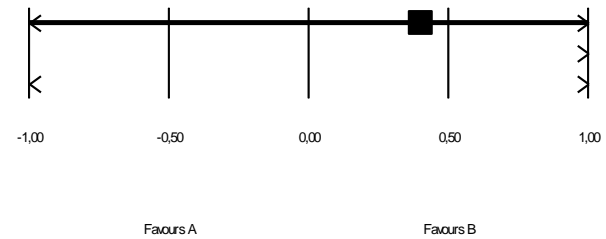









There are not enough data to realice Funnel Plot and the others estimates

|                 |                          |
|-----------------|--------------------------|
| <b>Articles</b> | <b>RCT exposed to OC</b> |
| Outcomes        | Hospitalized             |
| Limits          | SLE and All SLE          |
| Effect measure  | RR                       |

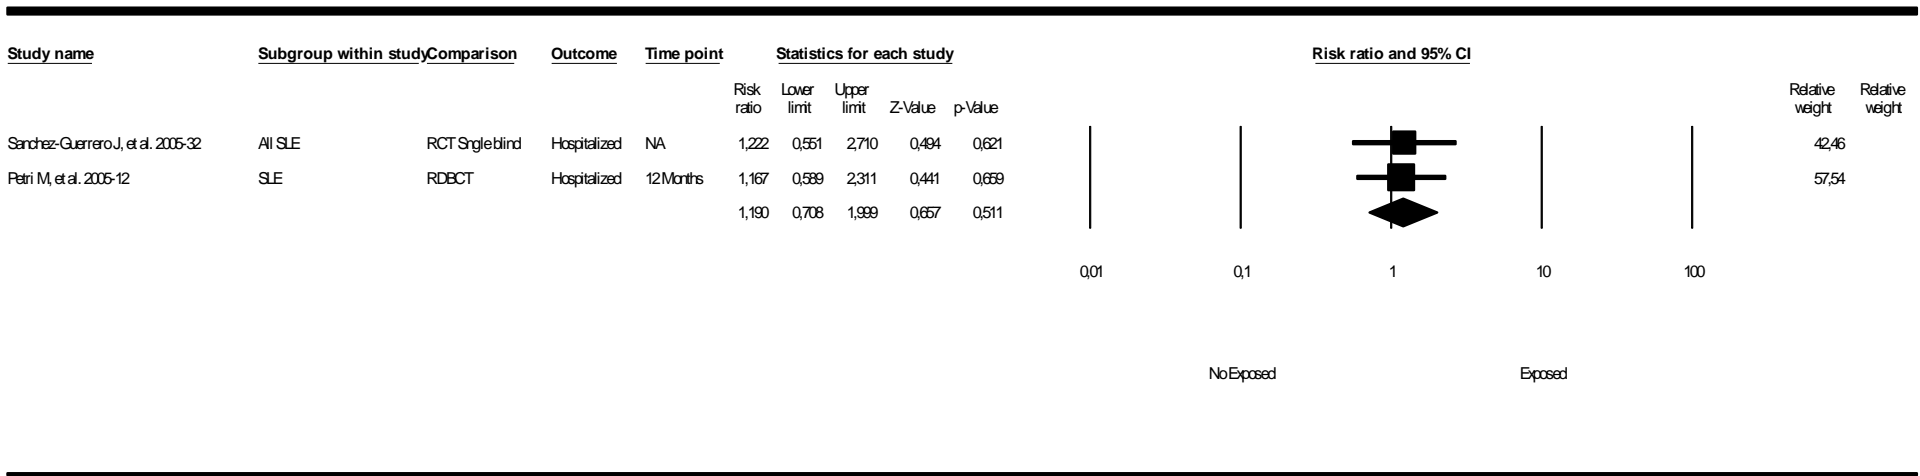



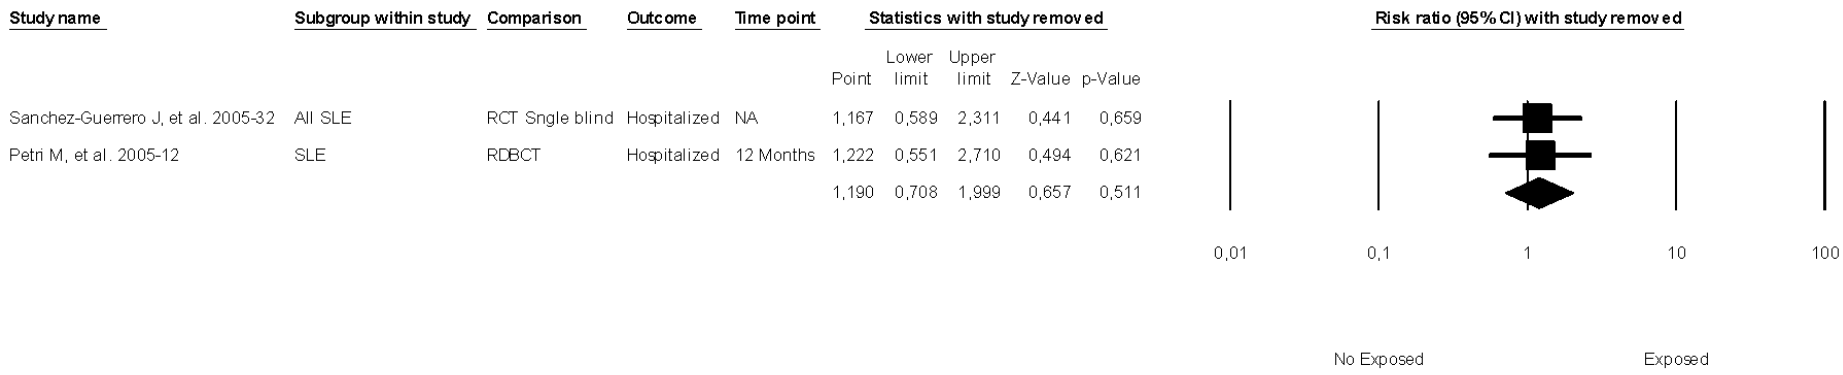

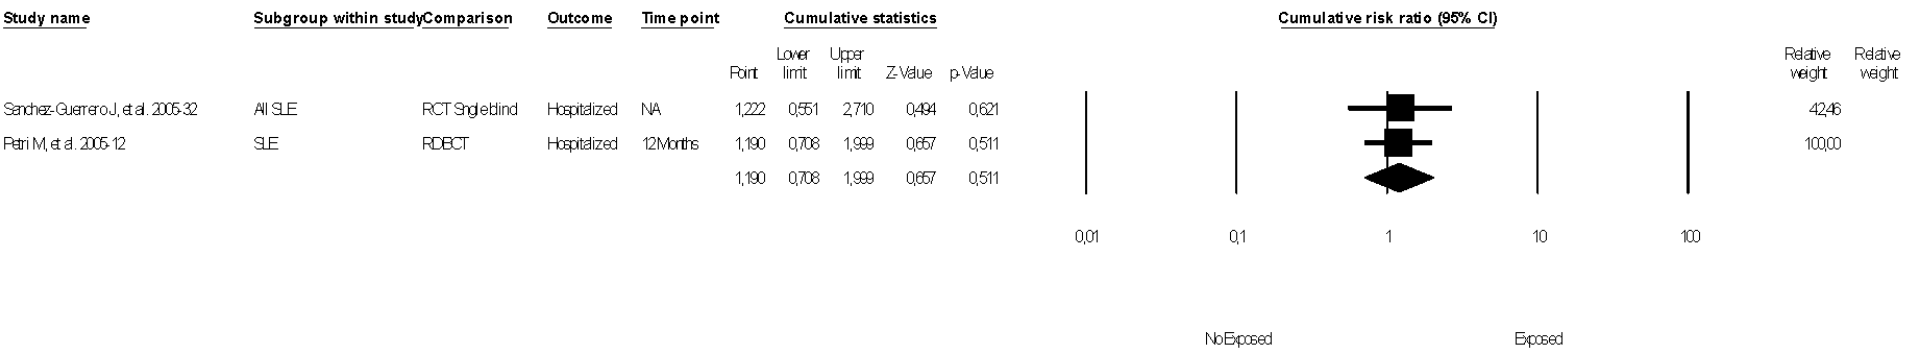



There are not enough data to realice Funnel Plot and the others estimates

|                 |                          |
|-----------------|--------------------------|
| <b>Articles</b> | <b>RCT exposed to OC</b> |
| Outcomes        | Death                    |
| Limits          | SLE and All SLE          |
| Effect measure  | RR                       |

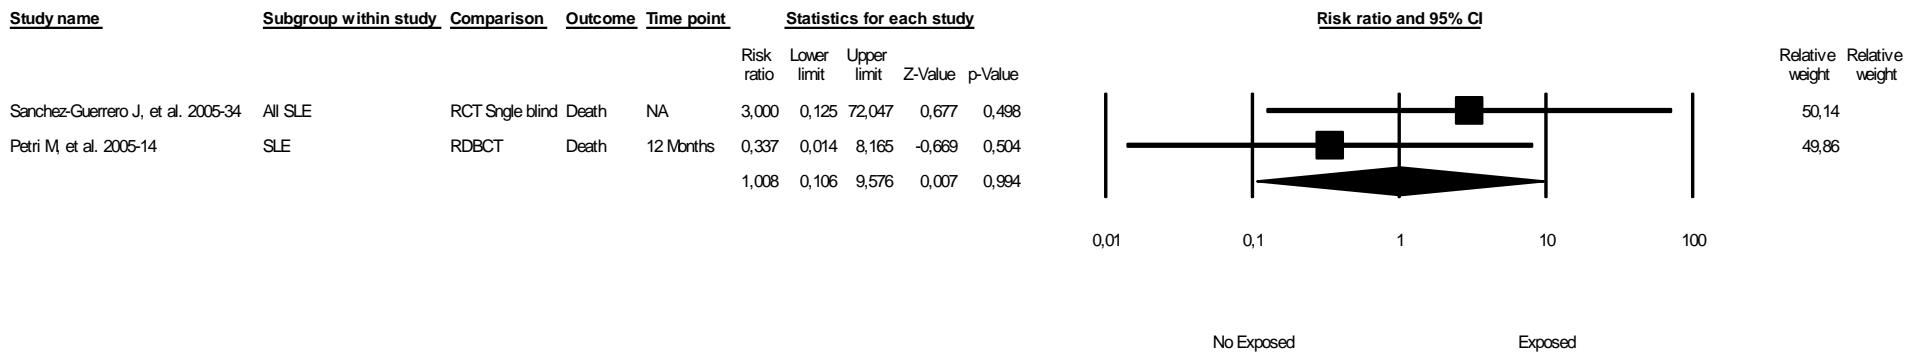



| Study name                         | Subgroup within study | Comparison       | Outcome | Time point | Statistics with study removed |             |             |         |         |
|------------------------------------|-----------------------|------------------|---------|------------|-------------------------------|-------------|-------------|---------|---------|
|                                    |                       |                  |         |            | Point                         | Lower limit | Upper limit | Z-Value | p-Value |
| Sanchez-Guerrero J, et al. 2005-34 | All SLE               | RCT Single blind | Death   | NA         | 0,337                         | 0,014       | 8,165       | -0,669  | 0,504   |
| Petri M, et al. 2005-14            | SLE                   | RDBCT            | Death   | 12 Months  | 3,000                         | 0,125       | 72,047      | 0,677   | 0,498   |
|                                    |                       |                  |         |            | 1,008                         | 0,106       | 9,576       | 0,007   | 0,994   |

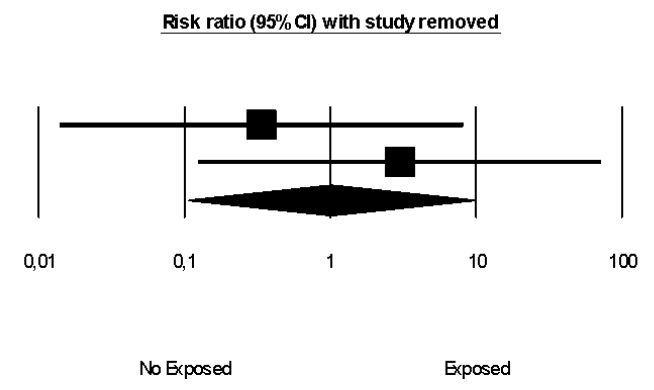



There are not enough data to realice Funnel Plot and the others estimates
